# Supplementary material for: Mixed guanine, adenine base quartets: possible roles of protons and metal ions in their stabilization
Source: PubMed Central journal article supplement (PMC5756560; doi:10.1007/s00775-017-1507-7), 2017-12-07
Supplement: 775_2017_1507_MOESM1_ESM.pdf [file 775_2017_1507_MOESM1_ESM.pdf]

## **Supplemental Material**

### **Mixed guanine, adenine base quartets: Possible roles of protons and metal ions in their stabilization**

Dominik A. Megger, Patrick M. Lax, Jeroen Paauwe, Célia Fonseca Guerra, Bernhard Lippert

#### Table of Contents:

1. Computational details
2. Figure S1
3. Figure S2
4. Figure S3
5. Table S1
6. Table S2
7. Table S3
8. Cartesian coordinates of all calculated quartets and nucleobases

### **Full computational details.**

All calculations were performed with the Amsterdam Density Functional (ADF) program.<sup>1</sup> The numerical integration was carried out using the procedure developed by te Velde et al..<sup>2</sup> The molecular orbitals were expanded in a large uncontracted set of Slater type orbitals (STOs): TZ2P for geometry optimization (that is: triple- $\xi$  quality, augmented by two sets of polarization functions) and QZ4P for energies (that is: quadruple- $\xi$  quality, augmented by four sets of polarization functions).<sup>3</sup> An auxiliary set of s, p, d, f and g STOs were used to fit the molecular density and to represent the Coulomb and exchange potentials accurately in each self-consistent field (SCF) cycle. Equilibrium structures were obtained by optimizations using analytical gradient techniques.<sup>4</sup> Geometries and energies were calculated at the BLYP level of generalized gradient approximation (GGA). BLYP described the exchange by Slater's  $X\alpha$  potential,<sup>5</sup> with nonlocal corrections due to Becke<sup>6</sup> added self-consistently, and the gradient-corrected functional of Lee, Yang and Parr<sup>7</sup> is used for the correlation. Dispersion corrections are applied using the DFT-D method, developed by Grimme.<sup>8</sup> In this approach, the density functional is augmented with an empirical term correcting for long-range dispersion effects, described by a sum of damped interatomic potentials of the form  $C6/(R6+c)$  added to the usual DFT energy. Scalar relativistic effects were accounted for using the zeroth-order regular approximation (ZORA).<sup>9</sup> Solvation in water is simulated using the conductor-like screening model (COSMO).<sup>10</sup> Radii of cations have been computed according to the procedure presented in Ref 11 to reproduce the solvation energy of the cation.<sup>12</sup> (The ionic radii parameter in COSMO were set to 1.364 Å for  $\text{Li}^+$ , 1.775 for  $\text{Na}^+$  and 2.200 for  $\text{K}^+$ ).

- 1 (a) G. te Velde, F. M. Bickelhaupt, E. J. Baerends, C. Fonseca Guerra, S. J. A. van Gisbergen, J. G. Snijders and T. Ziegler, *J. Comput. Chem.*, 2001, **22**, 931-967; (b) C. Fonseca Guerra, J. G. Snijders, G. te Velde and E. J. Baerends, *Theor. Chem. Acc.*, 1998, **99**, 391-403. (c) ADF2013, SCM, Theoretical Chemistry, Vrije Universiteit, Amsterdam, The Netherlands, <http://www.scm.com>, E. J. Baerends, T. Ziegler, J. Autschbach, D. Bashford, A. Bérces, F. M. Bickelhaupt, C. Bo, P. M. Boerrigter, L. Cavallo, D. P. Chong, L. Deng, R. M. Dickson, D. E. Ellis, M. van Faassen, L. Fan, T. H. Fischer, C. Fonseca Guerra, A. Ghysels, A. Giammona, S. J. A. van Gisbergen, A. W. Götz, J. A. Groeneveld, O. V. Gritsenko, M. Grüning, S. Gusarov, F. E. Harris, P. van den Hoek, C. R. Jacob, H. Jacobsen, L. Jensen, J. W. Kaminski, G. van Kessel, F. Kootstra, A. Kovalenko, M. V. Krykunov, E. van Lenthe, D. A. McCormack, A. Michalak, M. Mitoraj, J. Neugebauer, V. P. Nicu, L. Noodleman, V. P. Osinga, S. Patchkovskii, P. H. T. Philipsen, D. Post, C. C. Pye, W. Ravenek, J. I. Rodríguez, P. Ros, P. R. T. Schipper, G. Schreckenbach, J. S. Seldenthuis, M. Seth, J. G. Snijders, M. Solà, M. Swart, D. Swerhone, G. te Velde, P. Vernooijs, L. Versluis, L. Visscher, O. Visser, F. Wang, T. A. Wesolowski, E. M. van Wezenbeek, G. Wiesenekker, S. K. Wolff, T. K. Woo and A. L. Yakovlev.
- 2 (a) P. M. Boerrigter, G. te Velde and E. J. Baerends, *Int. J. Quantum Chem.*, 1988, **33**, 87-113; (b) G. te Velde and E. J. Baerends, *J. Comput. Phys.*, 1992, **99**, 84-98.
- 3 E. van Lenthe and E. J. Baerends, *J. Comput. Chem.*, 2003, **24**, 1142-1156.
- 4 L. Versluis and T. Ziegler, *J. Chem. Phys.*, 1988, **88**, 322-328.
- 5 J. C. Slater, *Quantum Theory of Molecules and Solids*. McGraw-Hill: New York, 1974; Vol. 4.
- 6 (a) A. D. Becke, *J. Chem. Phys.*, 1986, **84**, 4524-4529; (b) A. D. Becke, *Phys. Rev. A*, 1988, **38**, 3098-3100.
- 7 C. Lee, W. Yang and R. G. Parr, *Phys. Rev. B*, 1988, **37**, 785-789.
- 8 S. Grimme, J. Anthony, S. Ehrlich, and H. Krieg, *J. Chem. Phys.* 2010, **132**, 154104.
- 9 (a) E. van Lenthe, E. J. Baerends and J. G. Snijders, *J. Chem. Phys.*, 1994, **101**, 9783-9792; (b) E. van Lenthe, R. van Leeuwen, E. J. Baerends and J. G. Snijders, *Int. J. Quantum Chem.*, 1996, **57**, 281-293.
- 10 (a) A. Klamt, *J. Phys. Chem.*, 1995, **99**, 2224-2235; (b) C. C. Pye and T. Ziegler, *Theor. Chem. Acc.*, 1999, **101**, 396-408.
- 11 T. van der Wijst, C. Fonseca Guerra, M. Swart, F. M. Bickelhaupt and B. Lippert, *Angew. Chem. Int. Ed.* 2009, **48**, 3285-3287
- 12 Y. Marcus, *J. Chem. Soc., Faraday Trans.*, 1991, **87**, 2995-2999

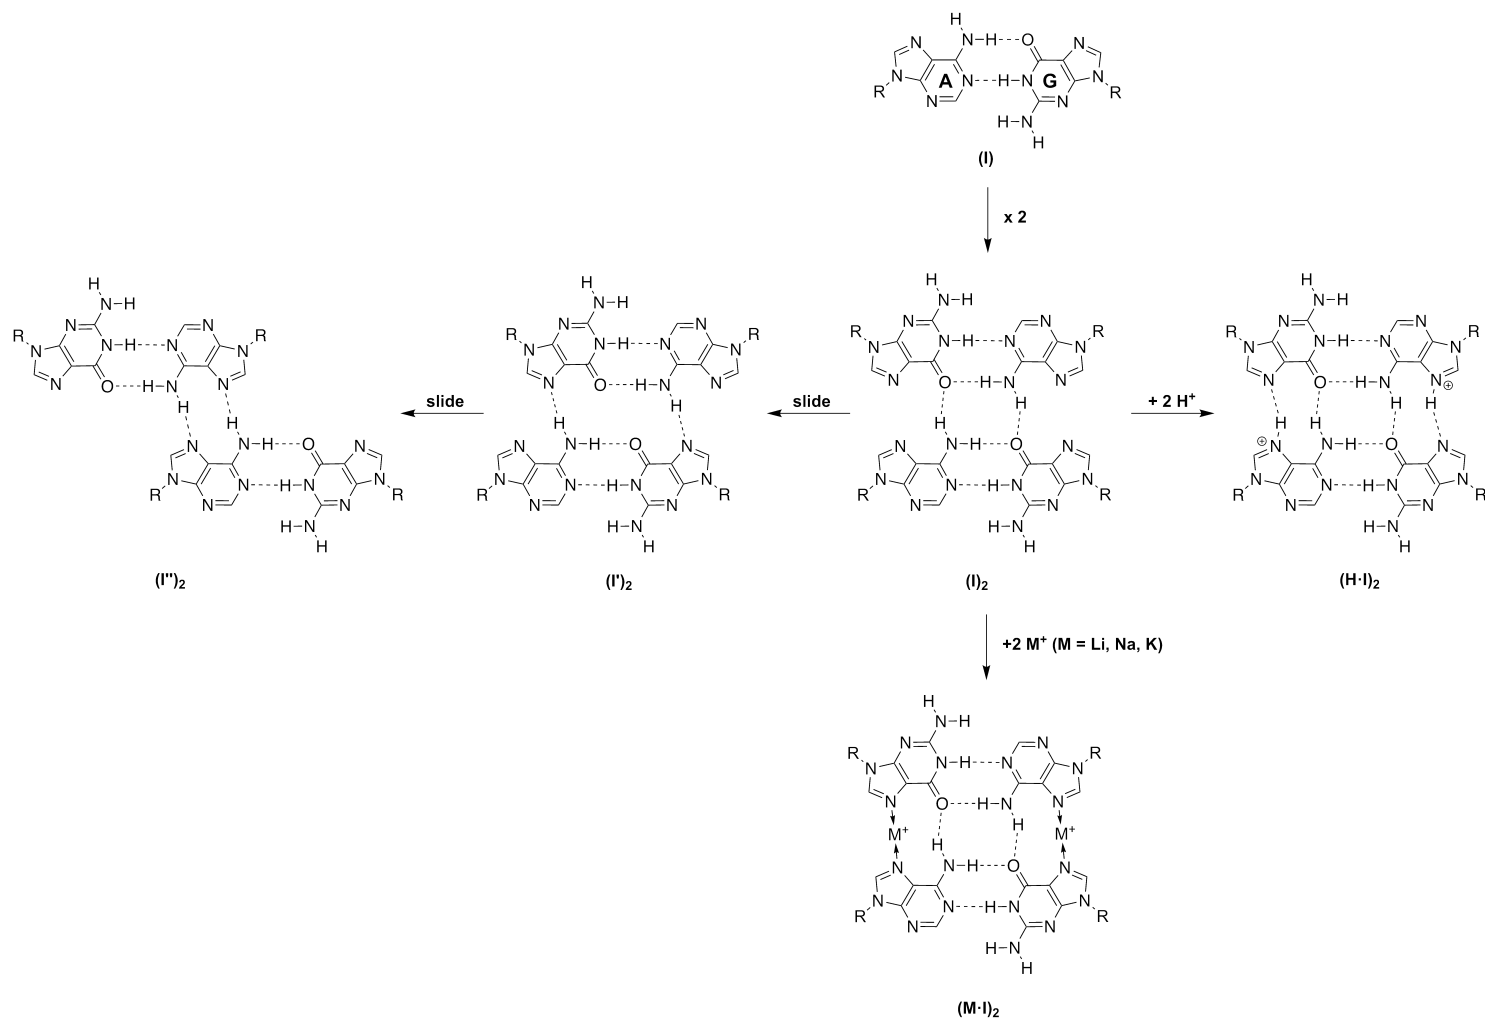

Figure S1. Schematic representation of possible AGAG quartets derived from the A · G mismatch pair (I).

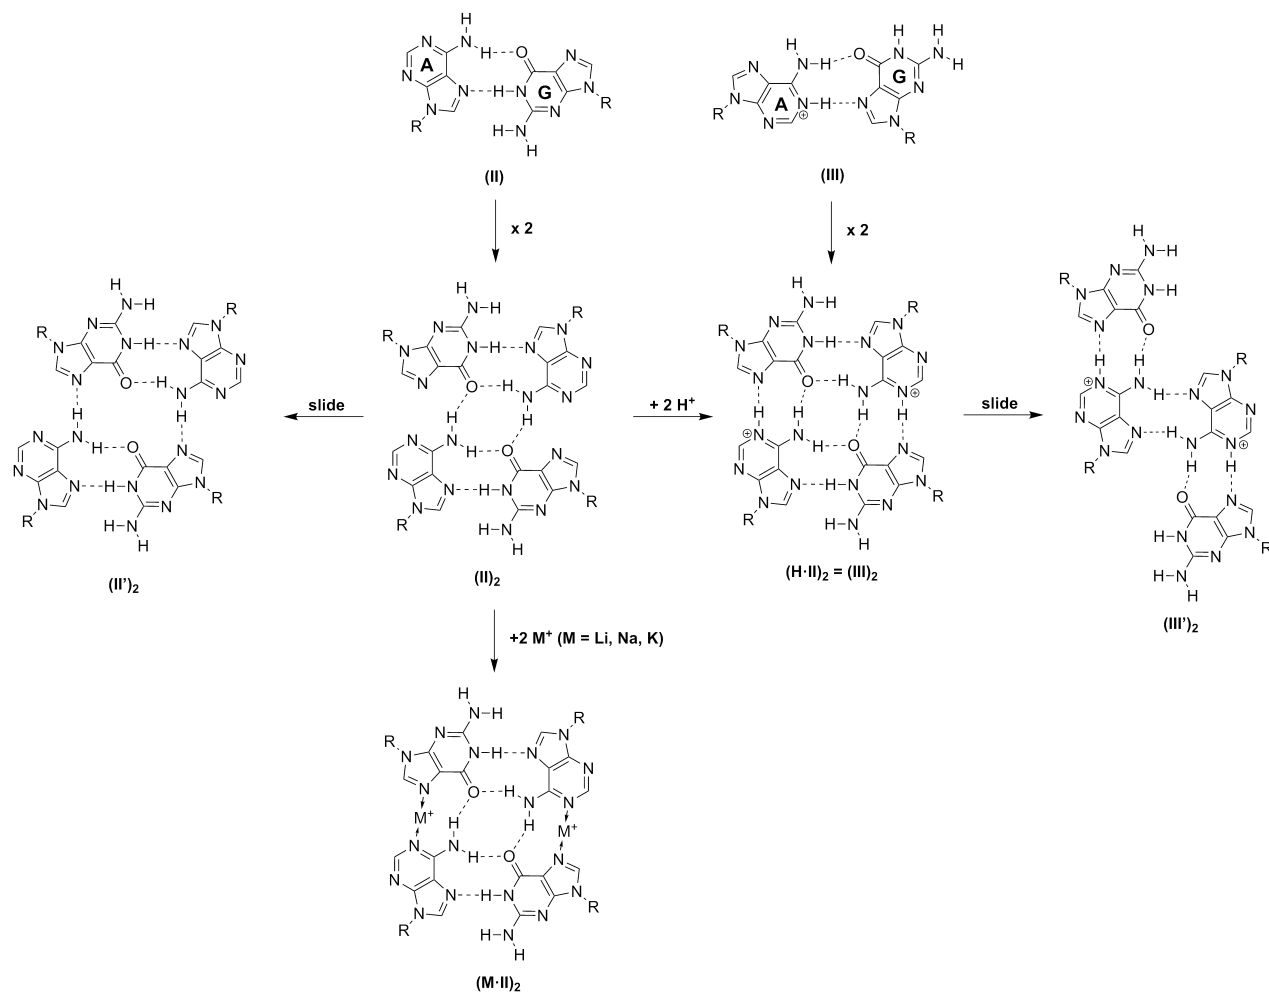

Figure S2. Schematic representation of possible AGAG quartets derived from the A · G mismatch pairs (II) and (III).

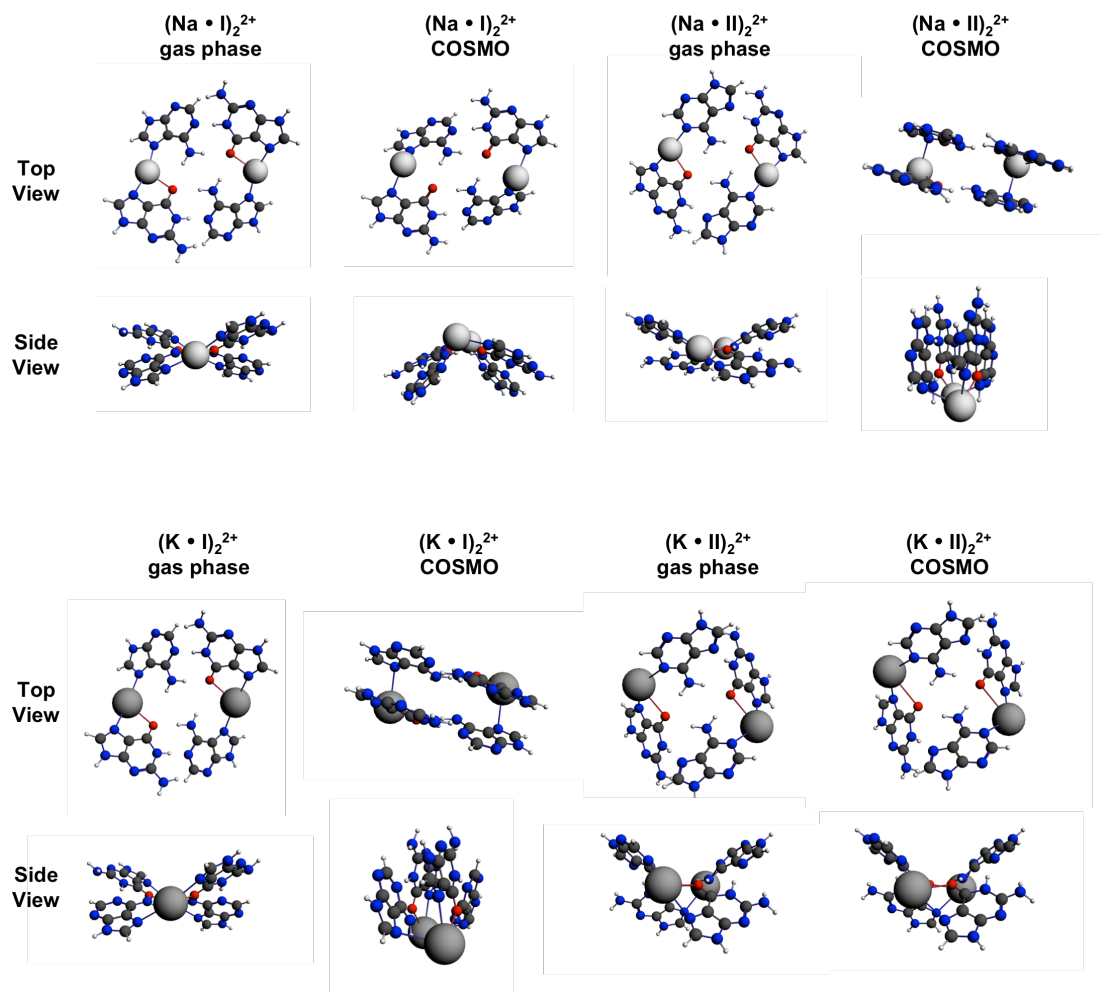

Figure S3. Geometry-optimized structures (ZORA-BLYP-D3/TZ2P) of AGAG quartets containing the alkali metal ions  $\text{Na}^+$  and  $\text{K}^+$ .

Table S1. Selected geometrical properties<sup>a</sup> and bond energies<sup>b</sup> of neutral quartets.

| Quartet            | Symmetry        | Environment     | $\Delta E$<br>(kcal mol <sup>-1</sup> ) | Hydrogen bonds           |                          |                   |                   |                          |                          |
|--------------------|-----------------|-----------------|-----------------------------------------|--------------------------|--------------------------|-------------------|-------------------|--------------------------|--------------------------|
|                    |                 |                 |                                         | Distance (Å)             |                          | Angle (°)         |                   | Distance (Å)             |                          |
| (I) <sub>2</sub>   | C <sub>2</sub>  | Gas phase       | -45,8                                   | O6(g)-N6H(a) (Hoogsteen) | O6(g)-N6H(a) (Hoogsteen) | O6(g)-N6H(a) (WC) | O6(g)-N6H(a) (WC) | N1H(g)-N1(a) (WC)        | N1H(g)-N1(a) (WC)        |
|                    |                 | C <sub>2h</sub> | Gas phase                               | -42,6                    | 2.900                    | 144.6             | 2.908             | 178.0                    | 2.855                    |
|                    | C <sub>2h</sub> | Water           | -15,2                                   | 2.949                    | 148.9                    | 2.922             | 179.5             | 2.917                    | 176.1                    |
|                    |                 | Water           | -9,3                                    | 2.945                    | 147.9                    | 2.920             | 178.0             | 2.874                    | 175.6                    |
| (I') <sub>2</sub>  | C <sub>2</sub>  | Gas phase       | -54,0                                   | N7(g)-N6H(a) (Hoogsteen) | N7(g)-N6H(a) (Hoogsteen) | O6(g)-N6H(a) (WC) | O6(g)-N6H(a) (WC) | N1H(g)-N1(a) (WC)        | N1H(g)-N1(a) (WC)        |
|                    |                 | C <sub>2h</sub> | Gas phase                               | -52,2                    | 2.913                    | 167.8             | 2.920             | 172.9                    | 2.860                    |
|                    | C <sub>2h</sub> | Water           | -18,7                                   | 2.951                    | 170.6                    | 2.870             | 175.0             | 2.921                    | 178.4                    |
|                    |                 | Water           | -16,5                                   | 2.944                    | 169.0                    | 2.957             | 174.6             | 2.873                    | 175.0                    |
| (I'') <sub>2</sub> | C <sub>2</sub>  | Gas phase       | -51,9                                   | N7(a)-N6H(a) (Hoogsteen) | N7(a)-N6H(a) (Hoogsteen) | O6(g)-N6H(a) (WC) | O6(g)-N6H(a) (WC) | N1H(g)-N1(a) (WC)        | N1H(g)-N1(a) (WC)        |
|                    |                 | C <sub>2h</sub> | Gas phase                               | -51,3                    | 2.934                    | 149.3             | 2.892             | 159.7                    | 2.891                    |
|                    | C <sub>2h</sub> | Water           | -18,5                                   | 2.906                    | 155.7                    | 2.816             | 173.7             | 2.970                    | 176.0                    |
|                    |                 | Water           | -17,5                                   | 2.961                    | 159.2                    | 2.889             | 171.1             | 2.897                    | 171.0                    |
| (II) <sub>2</sub>  | C <sub>2</sub>  | Gas phase       | n.d. <sup>c</sup>                       | O6(g)-N6H(a) (Hoogsteen) | O6(g)-N6H(a) (Hoogsteen) | O6(g)-N6H(a) (WC) | O6(g)-N6H(a) (WC) | N1H(g)-N7(a) (Hoogsteen) | N1H(g)-N7(a) (Hoogsteen) |
|                    |                 | C <sub>2h</sub> | Gas phase                               | n.d. <sup>c</sup>        | n.d.                     | n.d.              | n.d.              | n.d.                     | n.d.                     |
|                    | C <sub>2h</sub> | Water           | -14,4                                   | 2.897                    | 163.9                    | 2.903             | 149.4             | 2.883                    | 172.6                    |
|                    |                 | Water           | -7,3                                    | 2.907                    | 165.0                    | 3.010             | 166.3             | 2.960                    | 173.2                    |
| (II') <sub>2</sub> | C <sub>2</sub>  | Gas phase       | -50,1                                   | O6(g)-N6H(a) (Hoogsteen) | O6(g)-N6H(a) (Hoogsteen) | N7(g)-N6H(a) (WC) | N7(g)-N6H(a) (WC) | N1H(g)-N7(a) (Hoogsteen) | N1H(g)-N7(a) (Hoogsteen) |
|                    |                 | C <sub>2h</sub> | Gas phase                               | -46,3                    | 2.876                    | 165.1             | 2.924             | 165.6                    | 2.898                    |
|                    | C <sub>2h</sub> | Water           | -17,6                                   | 2.827                    | 165.0                    | 2.916             | 177.7             | 2.992                    | 176.4                    |
|                    |                 | Water           | -13,7                                   | 2.942                    | 166.2                    | 3.010             | 155.7             | 2.878                    | 175.1                    |
|                    |                 |                 |                                         | 2.847                    | 163.7                    | 2.933             | 178.1             | 2.980                    | 177.3                    |

a) Geometries were optimized at ZORA-BLYP-D3/TZ2P level of theory.

b) Energies were calculated at ZORA-BLYP-D3/QZ4P level of theory.

c) In the gas phase, the quartet (II)<sub>2</sub> collapsed into (II')<sub>2</sub>. Hence, no bond energies and geometrical properties could be assessed.

Table S2. Selected geometrical properties<sup>a</sup> and bond energies<sup>b</sup> of protonated quartets.

| Quartet                                    | Symmetry        | Environment | $\Delta E$<br>(kcal mol <sup>-1</sup> ) | Hydrogen bonds           |       |                          |       |                          |       |                          |       |
|--------------------------------------------|-----------------|-------------|-----------------------------------------|--------------------------|-------|--------------------------|-------|--------------------------|-------|--------------------------|-------|
|                                            |                 |             |                                         | Distance (Å)             |       | Angle (°)                |       | Distance (Å)             |       | Angle (°)                |       |
| (H • I) <sub>2</sub>                       | C <sub>2</sub>  | Gas phase   | -73.6                                   | N1H(g)-N1(a) (WC)        | 170.7 | O6(g)-N6H(a) (WC)        | 169.7 | O6(g)-N6H(a) (Hoogsteen) | 152.7 | N7(g)-N7H(a) (Hoogsteen) | 166.9 |
|                                            |                 | Gas phase   | -73.9                                   | N1H(g)-N1(a) (WC)        | 177.0 | O6(g)-N6H(a) (WC)        | 173.6 | O6(g)-N6H(a) (Hoogsteen) | 152.3 | N7(g)-N7H(a) (Hoogsteen) | 167.5 |
|                                            | C <sub>2h</sub> | Water       | -30.3                                   | N1H(g)-N1(a) (WC)        | 168.6 | O6(g)-N6H(a) (WC)        | 174.9 | O6(g)-N6H(a) (Hoogsteen) | 153.0 | N7(g)-N7H(a) (Hoogsteen) | 168.2 |
|                                            |                 | Water       | -28.6                                   | N1H(g)-N1(a) (WC)        | 177.3 | O6(g)-N6H(a) (WC)        | 174.0 | O6(g)-N6H(a) (Hoogsteen) | 148.2 | N7(g)-N7H(a) (Hoogsteen) | 168.4 |
| (H • II) <sub>2</sub> / (III) <sub>2</sub> | C <sub>2</sub>  | Gas phase   | -73.9                                   | N1H(g)-N7(a) (Hoogsteen) | 171.0 | O6(g)-N6H(a) (WC)        | 162.8 | O6(g)-N6H(a) (Hoogsteen) | 160.3 | N7(g)-N1H(a) (WC)        | 175.9 |
|                                            |                 | Gas phase   | -73.2                                   | N1H(g)-N7(a) (Hoogsteen) | 178.6 | O6(g)-N6H(a) (WC)        | 165.0 | O6(g)-N6H(a) (Hoogsteen) | 160.2 | N7(g)-N1H(a) (WC)        | 174.4 |
|                                            | C <sub>2h</sub> | Water       | -30.3                                   | N1H(g)-N7(a) (Hoogsteen) | 171.0 | O6(g)-N6H(a) (WC)        | 164.0 | O6(g)-N6H(a) (Hoogsteen) | 162.0 | N7(g)-N1H(a) (WC)        | 173.5 |
|                                            |                 | Water       | -29.0                                   | N1H(g)-N7(a) (Hoogsteen) | 179.3 | O6(g)-N6H(a) (WC)        | 162.4 | O6(g)-N6H(a) (Hoogsteen) | 160.9 | N7(g)-N1H(a) (WC)        | 177.0 |
| (III') <sub>2</sub>                        | C <sub>2</sub>  | Gas phase   | -68.0                                   | O6(g)-N6H(a) (WC)        | 164.6 | N7(a)-N6H(a) (Hoogsteen) | 159.6 | N7(g)-N1H(a) (WC)        | 175.2 |                          |       |
|                                            |                 | Gas phase   | -68.0                                   | O6(g)-N6H(a) (WC)        | 164.6 | N7(a)-N6H(a) (Hoogsteen) | 159.5 | N7(g)-N1H(a) (WC)        | 175.3 |                          |       |
|                                            | C <sub>2h</sub> | Water       | -23.6                                   | O6(g)-N6H(a) (WC)        | 162.0 | N7(a)-N6H(a) (Hoogsteen) | 158.9 | N7(g)-N1H(a) (WC)        | 176.8 |                          |       |
|                                            |                 | Water       | -23.4                                   | O6(g)-N6H(a) (WC)        | 162.0 | N7(a)-N6H(a) (Hoogsteen) | 158.9 | N7(g)-N1H(a) (WC)        | 176.9 |                          |       |

a) Geometries were optimized at ZORA-BLYP-D3/TZ2P level of theory.

b) Energies were calculated at ZORA-BLYP-D3/QZ4P level of theory.



Table S3. Selected geometrical properties<sup>a</sup> and bond energies<sup>b</sup> of metalated quartets.

| Quartet                | Symmetry        | Environment | $\Delta E$<br>(kcal mol <sup>-1</sup> ) | Coordinative bonds |                 |                 |                   | Hydrogen bonds              |                             |                      |                      |                             |                             |
|------------------------|-----------------|-------------|-----------------------------------------|--------------------|-----------------|-----------------|-------------------|-----------------------------|-----------------------------|----------------------|----------------------|-----------------------------|-----------------------------|
|                        |                 |             |                                         | Distance<br>(Å)    | Distance<br>(Å) | Distance<br>(Å) | Angle (°)         | Distance (Å)                | Angle (°)                   | Distance (Å)         | Angle (°)            | Distance (Å)                | Angle (°)                   |
| (Li • I) <sub>2</sub>  | C <sub>2</sub>  | Gas phase   | -209.3                                  | N7(g)-Metal        | N7(a)-Metal     | O6(g)-Metal     | N7(g)-Metal-N7(a) | N1H(g)-N1(a)<br>(WC)        | N1H(g)-N1(a)<br>(WC)        | O6(g)-N6H(a)<br>(WC) | O6(g)-N6H(a)<br>(WC) | O6(g)-N6H(a)<br>(Hoogsteen) | O6(g)-N6H(a)<br>(Hoogsteen) |
|                        | C <sub>2h</sub> | Gas phase   | -207.9                                  | 2.037              | 1.979           | 2.041           | 141.3             | 2.829                       | 175.0                       | 3.044                | 173.9                | 3.027                       | 175.2                       |
|                        | C <sub>2</sub>  | Water       | -120.7                                  | 2.021              | 1.965           | 2.023           | 135.7             | 2.910                       | 178.7                       | 2.954                | 178.2                | 3.280                       | 176.2                       |
|                        | C <sub>2h</sub> | Water       | -114.8                                  | 2.120              | 2.055           | 2.202           | 98.8              | 2.882                       | 177.0                       | 2.988                | 176.8                | 3.133                       | 152.6                       |
| (Na • I) <sub>2</sub>  | C <sub>2</sub>  | Gas phase   | -161.1                                  | 2.047              | 1.984           | 2.076           | 135.5             | 2.909                       | 179.3                       | 2.921                | 178.8                | 3.341                       | 173.7                       |
|                        | C <sub>2h</sub> | Gas phase   | -157.3                                  | 2.354              | 2.359           | 2.422           | 163.0             | 2.811                       | 175.6                       | 3.138                | 171.3                | 3.184                       | 162.1                       |
|                        | C <sub>2</sub>  | Water       | -126.3                                  | 2.361              | 2.366           | 2.374           | 147.1             | 2.914                       | 179.2                       | 2.902                | 179.7                | 4.088                       | 172.0                       |
|                        | C <sub>2h</sub> | Water       | -118.5                                  | 2.390              | 2.419           | 2.947           | 103.7             | 2.861                       | 175.0                       | 2.989                | 176.9                | 3.003                       | 165.7                       |
| (K • I) <sub>2</sub>   | C <sub>2</sub>  | Gas phase   | -119.8                                  | 2.431              | 2.393           | 2.447           | 148.3             | 2.971                       | 179.9                       | 2.874                | 179.7                | 4.255                       | 170.9                       |
|                        | C <sub>2h</sub> | Gas phase   | -117.0                                  | 2.762              | 2.836           | 2.777           | 170.1             | 2.822                       | 175.2                       | 3.019                | 172.4                | 3.854                       | 134.6                       |
|                        | C <sub>2</sub>  | Water       | -125.6                                  | 2.765              | 2.877           | 2.752           | 156.4             | 2.931                       | 179.2                       | 2.866                | 179.4                | 5.130                       | 169.0                       |
|                        | C <sub>2h</sub> | Water       | -112.5                                  | 2.099              | 2.999           | 2.857           | 73.0              | 2.843                       | 174.2                       | 2.884                | 174.3                | 3.347                       | 73.7                        |
|                        |                 |             |                                         | 2.883              | 2.887           | 2.880           | 157.0             | 2.932                       | 179.6                       | 2.849                | 179.6                | 5.307                       | 168.1                       |
| (Li • II) <sub>2</sub> | C <sub>2</sub>  | Gas phase   | -207.3                                  | N7(g)-Metal        | N1(a)-Metal     | O6(g)-Metal     | N7(g)-Metal-N1(a) | N1H(g)-N7(a)<br>(Hoogsteen) | N1H(g)-N7(a)<br>(Hoogsteen) | O6(g)-N6H(a)<br>(WC) | O6(g)-N6H(a)<br>(WC) | O6(g)-N6H(a)<br>(Hoogsteen) | O6(g)-N6H(a)<br>(Hoogsteen) |
|                        | C <sub>2h</sub> | Gas phase   | -204.1                                  | 2.030              | 1.990           | 2.079           | 147.0             | 2.849                       | 170.8                       | 3.092                | 165.0                | 3.002                       | 162.9                       |
|                        | C <sub>2</sub>  | Water       | -121.3                                  | 2.013              | 1.975           | 2.074           | 143.5             | 2.990                       | 172.3                       | 3.256                | 165.3                | 2.926                       | 159.1                       |
|                        | C <sub>2h</sub> | Water       | -112.6                                  | 1.999              | 2.030           | 3.119           | 112.2             | 2.844                       | 176.1                       | 2.926                | 165.1                | 2.959                       | 167.0                       |
| (Na • II) <sub>2</sub> | C <sub>2</sub>  | Gas phase   | -159.9                                  | 2.038              | 2.003           | 2.105           | 143.5             | 2.967                       | 173.0                       | 3.294                | 166.9                | 2.919                       | 160.0                       |
|                        | C <sub>2h</sub> | Gas phase   | -155.6                                  | 2.350              | 2.371           | 2.455           | 172.9             | 2.837                       | 170.8                       | 3.333                | 172.6                | 3.062                       | 166.1                       |
|                        | C <sub>2</sub>  | Water       | -130.3                                  | 2.354              | 2.376           | 2.398           | 154.6             | 2.969                       | 173.7                       | 4.088                | 166.7                | 2.863                       | 163.0                       |
|                        | C <sub>2h</sub> | Water       | -117.6                                  | 2.491              | 2.640           | 2.487           | 88.0              | 2.897                       | 176.7                       | 3.352                | 64.9                 | 2.841                       | 165.5                       |
| (K • II) <sub>2</sub>  | C <sub>2</sub>  | Gas phase   | -121.8                                  | 2.408              | 2.411           | 2.451           | 154.4             | 2.950                       | 175.1                       | 4.201                | 167.4                | 2.853                       | 163.5                       |
|                        | C <sub>2h</sub> | Gas phase   | -116.3                                  | 2.776              | 2.814           | 3.003           | 141.4             | 2.851                       | 172.7                       | 3.046                | 178.4                | 3.187                       | 169.1                       |
|                        | C <sub>2</sub>  | Water       | -120.2                                  | 2.765              | 2.853           | 2.779           | 166.1             | 2.984                       | 174.0                       | 5.073                | 165.6                | 2.834                       | 162.6                       |
|                        | C <sub>2h</sub> | Water       | -112.3                                  | 2.829              | 2.870           | 3.311           | 132.7             | 2.846                       | 173.7                       | 2.965                | 169.6                | 3.053                       | 168.3                       |
|                        |                 |             |                                         | 2.854              | 2.904           | 2.872           | 163.4             | 2.953                       | 176.3                       | 5.245                | 167.2                | 2.830                       | 163.9                       |

a) Geometries were optimized at ZORA-BLYP-D3/TZ2P level of theory.

b) Energies were calculated at ZORA-BLYP-D3/QZ4P level of theory.

**(I)<sub>2</sub> gas phase C<sub>2</sub> E = -9557.8787**

|   |           |           |           |
|---|-----------|-----------|-----------|
| N | -0.501700 | -3.785600 | 0.129000  |
| C | -0.404100 | -5.106900 | 0.397500  |
| N | 0.692900  | -5.839000 | 0.622500  |
| C | 1.802600  | -5.073400 | 0.560600  |
| C | 1.869100  | -3.698300 | 0.284700  |
| C | 0.639600  | -3.033600 | 0.028200  |
| N | 3.117500  | -5.458000 | 0.744900  |
| C | 3.893500  | -4.316300 | 0.577700  |
| N | 3.182000  | -3.244000 | 0.301900  |
| N | 0.548400  | -1.738200 | -0.298300 |
| N | -3.041900 | -2.492900 | -0.037000 |
| C | -4.123700 | -3.204500 | 0.414600  |
| N | -5.383400 | -2.832000 | 0.254900  |
| C | -5.490100 | -1.661700 | -0.421000 |
| C | -4.466400 | -0.825000 | -0.897100 |
| C | -3.108400 | -1.231900 | -0.684600 |
| N | -6.659300 | -1.025000 | -0.771100 |
| C | -6.294500 | 0.144800  | -1.437400 |
| N | -4.993500 | 0.295000  | -1.528200 |
| O | -2.054600 | -0.641500 | -0.990300 |
| N | -3.848400 | -4.407900 | 1.040800  |
| N | 0.501700  | 3.785600  | 0.129000  |
| C | 0.404100  | 5.106900  | 0.397500  |
| N | -0.692900 | 5.839000  | 0.622500  |
| C | -1.802600 | 5.073400  | 0.560600  |
| C | -1.869100 | 3.698300  | 0.284700  |
| C | -0.639600 | 3.033600  | 0.028200  |
| N | -3.117500 | 5.458000  | 0.744900  |
| C | -3.893500 | 4.316300  | 0.577700  |
| N | -3.182000 | 3.244000  | 0.301900  |
| N | -0.548400 | 1.738200  | -0.298300 |
| N | 3.041900  | 2.492900  | -0.037000 |
| C | 4.123700  | 3.204500  | 0.414600  |
| N | 5.383400  | 2.832000  | 0.254900  |
| C | 5.490100  | 1.661700  | -0.421000 |
| C | 4.466400  | 0.825000  | -0.897100 |
| C | 3.108400  | 1.231900  | -0.684600 |
| N | 6.659300  | 1.025000  | -0.771100 |
| C | 6.294500  | -0.144800 | -1.437400 |
| N | 4.993500  | -0.295000 | -1.528200 |
| O | 2.054600  | 0.641500  | -0.990300 |
| N | 3.848400  | 4.407900  | 1.040800  |
| H | -1.350100 | -5.646000 | 0.418000  |
| H | 3.434400  | -6.397100 | 0.951900  |
| H | 4.970700  | -4.346800 | 0.674900  |
| H | 1.382200  | -1.180300 | -0.479200 |
| H | -0.360800 | -1.342700 | -0.562100 |
| H | -2.086700 | -2.935400 | 0.031800  |
| H | -7.593500 | -1.364800 | -0.578400 |

|   |           |           |           |
|---|-----------|-----------|-----------|
| H | -7.038900 | 0.826500  | -1.826400 |
| H | -2.972800 | -4.467700 | 1.548900  |
| H | -4.646500 | -4.803100 | 1.525500  |
| H | 1.350100  | 5.646000  | 0.418000  |
| H | -3.434400 | 6.397100  | 0.951900  |
| H | -4.970700 | 4.346800  | 0.674900  |
| H | -1.382200 | 1.180300  | -0.479200 |
| H | 0.360800  | 1.342700  | -0.562100 |
| H | 2.086700  | 2.935400  | 0.031800  |
| H | 7.593500  | 1.364800  | -0.578400 |
| H | 7.038900  | -0.826500 | -1.826400 |
| H | 2.972800  | 4.467700  | 1.548900  |
| H | 4.646500  | 4.803100  | 1.525500  |

**(I)<sub>2</sub> gas phase C<sub>2h</sub> E = -9554.6754**

|   |           |           |          |
|---|-----------|-----------|----------|
| N | -0.512200 | -3.973800 | 0.000000 |
| C | -0.367400 | -5.317000 | 0.000000 |
| N | 0.745500  | -6.056100 | 0.000000 |
| C | 1.840200  | -5.266400 | 0.000000 |
| C | 1.864600  | -3.863900 | 0.000000 |
| C | 0.613400  | -3.189000 | 0.000000 |
| N | 3.169800  | -5.641800 | 0.000000 |
| C | 3.913200  | -4.464500 | 0.000000 |
| N | 3.165400  | -3.383300 | 0.000000 |
| N | 0.502700  | -1.854100 | 0.000000 |
| N | -3.127300 | -2.681600 | 0.000000 |
| C | -4.213400 | -3.524400 | 0.000000 |
| N | -5.474700 | -3.117700 | 0.000000 |
| C | -5.577500 | -1.769100 | 0.000000 |
| C | -4.554300 | -0.803900 | 0.000000 |
| C | -3.194100 | -1.260500 | 0.000000 |
| N | -6.748800 | -1.046400 | 0.000000 |
| C | -6.387600 | 0.301100  | 0.000000 |
| N | -5.088200 | 0.480100  | 0.000000 |
| O | -2.136600 | -0.600600 | 0.000000 |
| N | -3.958800 | -4.866900 | 0.000000 |
| N | 0.512200  | 3.973800  | 0.000000 |
| C | 0.367400  | 5.317000  | 0.000000 |
| N | -0.745500 | 6.056100  | 0.000000 |
| C | -1.840200 | 5.266400  | 0.000000 |
| C | -1.864600 | 3.863900  | 0.000000 |
| C | -0.613400 | 3.189000  | 0.000000 |
| N | -3.169800 | 5.641800  | 0.000000 |
| C | -3.913200 | 4.464500  | 0.000000 |
| N | -3.165400 | 3.383300  | 0.000000 |
| N | -0.502700 | 1.854100  | 0.000000 |
| N | 3.127300  | 2.681600  | 0.000000 |
| C | 4.213400  | 3.524400  | 0.000000 |
| N | 5.474700  | 3.117700  | 0.000000 |

|   |           |           |          |
|---|-----------|-----------|----------|
| C | 5.577500  | 1.769100  | 0.000000 |
| C | 4.554300  | 0.803900  | 0.000000 |
| C | 3.194100  | 1.260500  | 0.000000 |
| N | 6.748800  | 1.046400  | 0.000000 |
| C | 6.387600  | -0.301100 | 0.000000 |
| N | 5.088200  | -0.480100 | 0.000000 |
| O | 2.136600  | 0.600600  | 0.000000 |
| N | 3.958800  | 4.866900  | 0.000000 |
| H | -1.292600 | -5.894300 | 0.000000 |
| H | 3.515200  | -6.593500 | 0.000000 |
| H | 4.995200  | -4.479400 | 0.000000 |
| H | 1.333200  | -1.260700 | 0.000000 |
| H | -0.421200 | -1.409200 | 0.000000 |
| H | -2.168000 | -3.105100 | 0.000000 |
| H | -7.681100 | -1.441700 | 0.000000 |
| H | -7.135400 | 1.083000  | 0.000000 |
| H | -3.020300 | -5.231100 | 0.000000 |
| H | -4.744900 | -5.499300 | 0.000000 |
| H | 1.292600  | 5.894300  | 0.000000 |
| H | -3.515200 | 6.593500  | 0.000000 |
| H | -4.995200 | 4.479400  | 0.000000 |
| H | -1.333200 | 1.260700  | 0.000000 |
| H | 0.421200  | 1.409200  | 0.000000 |
| H | 2.168000  | 3.105100  | 0.000000 |
| H | 7.681100  | 1.441700  | 0.000000 |
| H | 7.135400  | -1.083000 | 0.000000 |
| H | 3.020300  | 5.231100  | 0.000000 |
| H | 4.744900  | 5.499300  | 0.000000 |

**(I)<sub>2</sub> water C<sub>2</sub>                    E = -9607.7009**

|   |           |           |           |
|---|-----------|-----------|-----------|
| N | -0.502400 | -3.754500 | 0.130500  |
| C | -0.397600 | -5.083100 | 0.346200  |
| N | 0.714500  | -5.815400 | 0.508400  |
| C | 1.826100  | -5.046700 | 0.441600  |
| C | 1.870200  | -3.659500 | 0.220100  |
| C | 0.631600  | -2.996400 | 0.039800  |
| N | 3.143900  | -5.428300 | 0.564600  |
| C | 3.908800  | -4.289500 | 0.420900  |
| N | 3.185100  | -3.200400 | 0.209800  |
| N | 0.515200  | -1.676600 | -0.202500 |
| N | -3.064500 | -2.456200 | 0.040300  |
| C | -4.139800 | -3.162200 | 0.528200  |
| N | -5.405700 | -2.785700 | 0.364600  |
| C | -5.522900 | -1.638200 | -0.347000 |
| C | -4.495500 | -0.833000 | -0.869200 |
| C | -3.146300 | -1.242900 | -0.665400 |
| N | -6.687900 | -1.005900 | -0.706600 |
| C | -6.334800 | 0.123800  | -1.423400 |
| N | -5.027000 | 0.265300  | -1.542800 |

|   |           |           |           |
|---|-----------|-----------|-----------|
| O | -2.092600 | -0.664700 | -1.040900 |
| N | -3.856900 | -4.340100 | 1.168900  |
| N | 0.502400  | 3.754500  | 0.130500  |
| C | 0.397600  | 5.083100  | 0.346200  |
| N | -0.714500 | 5.815400  | 0.508400  |
| C | -1.826100 | 5.046700  | 0.441600  |
| C | -1.870200 | 3.659500  | 0.220100  |
| C | -0.631600 | 2.996400  | 0.039800  |
| N | -3.143900 | 5.428300  | 0.564600  |
| C | -3.908800 | 4.289500  | 0.420900  |
| N | -3.185100 | 3.200400  | 0.209800  |
| N | -0.515200 | 1.676600  | -0.202500 |
| N | 3.064500  | 2.456200  | 0.040300  |
| C | 4.139800  | 3.162200  | 0.528200  |
| N | 5.405700  | 2.785700  | 0.364600  |
| C | 5.522900  | 1.638200  | -0.347000 |
| C | 4.495500  | 0.833000  | -0.869200 |
| C | 3.146300  | 1.242900  | -0.665400 |
| N | 6.687900  | 1.005900  | -0.706600 |
| C | 6.334800  | -0.123800 | -1.423400 |
| N | 5.027000  | -0.265300 | -1.542800 |
| O | 2.092600  | 0.664700  | -1.040900 |
| N | 3.856900  | 4.340100  | 1.168900  |
| H | -1.339500 | -5.625700 | 0.384000  |
| H | 3.488000  | -6.367300 | 0.731700  |
| H | 4.987400  | -4.324400 | 0.484400  |
| H | 1.338400  | -1.113200 | -0.409100 |
| H | -0.399700 | -1.304400 | -0.480500 |
| H | -2.113200 | -2.895800 | 0.108300  |
| H | -7.629800 | -1.315800 | -0.494000 |
| H | -7.082700 | 0.790900  | -1.827500 |
| H | -2.960000 | -4.418900 | 1.635000  |
| H | -4.630500 | -4.753400 | 1.678800  |
| H | 1.339500  | 5.625700  | 0.384000  |
| H | -3.488000 | 6.367300  | 0.731700  |
| H | -4.987400 | 4.324400  | 0.484400  |
| H | -1.338400 | 1.113200  | -0.409100 |
| H | 0.399700  | 1.304400  | -0.480500 |
| H | 2.113200  | 2.895800  | 0.108300  |
| H | 7.629800  | 1.315800  | -0.494000 |
| H | 7.082700  | -0.790900 | -1.827500 |
| H | 2.960000  | 4.418900  | 1.635000  |
| H | 4.630500  | 4.753400  | 1.678800  |

**(I)<sub>2</sub> water C<sub>2h</sub>                    E = -9601.7804**

|   |           |           |          |
|---|-----------|-----------|----------|
| N | -0.542000 | -3.937600 | 0.000000 |
| C | -0.387600 | -5.279000 | 0.000000 |
| N | 0.742800  | -5.999400 | 0.000000 |
| C | 1.833600  | -5.198700 | 0.000000 |

|   |           |           |          |
|---|-----------|-----------|----------|
| C | 1.832100  | -3.795100 | 0.000000 |
| C | 0.573100  | -3.143500 | 0.000000 |
| N | 3.164800  | -5.553200 | 0.000000 |
| C | 3.892500  | -4.380200 | 0.000000 |
| N | 3.130700  | -3.297600 | 0.000000 |
| N | 0.436200  | -1.805200 | 0.000000 |
| N | -3.207400 | -2.702900 | 0.000000 |
| C | -4.291000 | -3.556700 | 0.000000 |
| N | -5.558100 | -3.140600 | 0.000000 |
| C | -5.666400 | -1.792500 | 0.000000 |
| C | -4.635700 | -0.835100 | 0.000000 |
| C | -3.284800 | -1.294600 | 0.000000 |
| N | -6.830800 | -1.064100 | 0.000000 |
| C | -6.474300 | 0.273600  | 0.000000 |
| N | -5.167000 | 0.455500  | 0.000000 |
| O | -2.226500 | -0.612500 | 0.000000 |
| N | -4.034900 | -4.886600 | 0.000000 |
| N | 0.542000  | 3.937600  | 0.000000 |
| C | 0.387600  | 5.279000  | 0.000000 |
| N | -0.742800 | 5.999400  | 0.000000 |
| C | -1.833600 | 5.198700  | 0.000000 |
| C | -1.832100 | 3.795100  | 0.000000 |
| C | -0.573100 | 3.143500  | 0.000000 |
| N | -3.164800 | 5.553200  | 0.000000 |
| C | -3.892500 | 4.380200  | 0.000000 |
| N | -3.130700 | 3.297600  | 0.000000 |
| N | -0.436200 | 1.805200  | 0.000000 |
| N | 3.207400  | 2.702900  | 0.000000 |
| C | 4.291000  | 3.556700  | 0.000000 |
| N | 5.558100  | 3.140600  | 0.000000 |
| C | 5.666400  | 1.792500  | 0.000000 |
| C | 4.635700  | 0.835100  | 0.000000 |
| C | 3.284800  | 1.294600  | 0.000000 |
| N | 6.830800  | 1.064100  | 0.000000 |
| C | 6.474300  | -0.273600 | 0.000000 |
| N | 5.167000  | -0.455500 | 0.000000 |
| O | 2.226500  | 0.612500  | 0.000000 |
| N | 4.034900  | 4.886600  | 0.000000 |
| H | -1.304300 | -5.863700 | 0.000000 |
| H | 3.539400  | -6.495500 | 0.000000 |
| H | 4.973400  | -4.387900 | 0.000000 |
| H | 1.255300  | -1.199600 | 0.000000 |
| H | -0.499400 | -1.384800 | 0.000000 |
| H | -2.247600 | -3.118300 | 0.000000 |
| H | -7.772700 | -1.439900 | 0.000000 |
| H | -7.221800 | 1.054300  | 0.000000 |
| H | -3.096100 | -5.251800 | 0.000000 |
| H | -4.807600 | -5.538100 | 0.000000 |
| H | 1.304300  | 5.863700  | 0.000000 |
| H | -3.539400 | 6.495500  | 0.000000 |

|   |           |           |          |
|---|-----------|-----------|----------|
| H | -4.973400 | 4.387900  | 0.000000 |
| H | -1.255300 | 1.199600  | 0.000000 |
| H | 0.499400  | 1.384800  | 0.000000 |
| H | 2.247600  | 3.118300  | 0.000000 |
| H | 7.772700  | 1.439900  | 0.000000 |
| H | 7.221800  | -1.054300 | 0.000000 |
| H | 3.096100  | 5.251800  | 0.000000 |
| H | 4.807600  | 5.538100  | 0.000000 |

**(I')<sub>2</sub> gas phase C<sub>2</sub> E = -9566.0925**

|   |           |           |           |
|---|-----------|-----------|-----------|
| N | 3.637200  | -2.313700 | -0.585900 |
| C | 4.731800  | -3.083200 | -0.414600 |
| N | 5.998900  | -2.709300 | -0.199300 |
| C | 6.098400  | -1.363400 | -0.161700 |
| C | 5.067800  | -0.425100 | -0.331000 |
| C | 3.760200  | -0.944200 | -0.582400 |
| N | 7.238000  | -0.607800 | 0.046100  |
| C | 6.849900  | 0.722200  | -0.004800 |
| N | 5.559800  | 0.876200  | -0.228000 |
| N | 2.691500  | -0.182000 | -0.812900 |
| N | 1.018800  | -3.370200 | -0.132500 |
| C | 0.892800  | -4.506700 | 0.625600  |
| N | -0.263300 | -5.051000 | 0.981300  |
| C | -1.326500 | -4.341800 | 0.526200  |
| C | -1.321600 | -3.160800 | -0.222100 |
| C | -0.067000 | -2.576900 | -0.600300 |
| N | -2.664000 | -4.607400 | 0.754300  |
| C | -3.392900 | -3.582800 | 0.159000  |
| N | -2.613900 | -2.705500 | -0.434600 |
| O | 0.136000  | -1.531600 | -1.230100 |
| N | 2.070100  | -5.130100 | 0.998700  |
| N | -3.637200 | 2.313700  | -0.585900 |
| C | -4.731800 | 3.083200  | -0.414600 |
| N | -5.998900 | 2.709300  | -0.199300 |
| C | -6.098400 | 1.363400  | -0.161700 |
| C | -5.067800 | 0.425100  | -0.331000 |
| C | -3.760200 | 0.944200  | -0.582400 |
| N | -7.238000 | 0.607800  | 0.046100  |
| C | -6.849900 | -0.722200 | -0.004800 |
| N | -5.559800 | -0.876200 | -0.228000 |
| N | -2.691500 | 0.182000  | -0.812900 |
| N | -1.018800 | 3.370200  | -0.132500 |
| C | -0.892800 | 4.506700  | 0.625600  |
| N | 0.263300  | 5.051000  | 0.981300  |
| C | 1.326500  | 4.341800  | 0.526200  |
| C | 1.321600  | 3.160800  | -0.222100 |
| C | 0.067000  | 2.576900  | -0.600300 |
| N | 2.664000  | 4.607400  | 0.754300  |
| C | 3.392900  | 3.582800  | 0.159000  |

|   |           |           |           |
|---|-----------|-----------|-----------|
| N | 2.613900  | 2.705500  | -0.434600 |
| O | -0.136000 | 1.531600  | -1.230100 |
| N | -2.070100 | 5.130100  | 0.998700  |
| H | 4.554800  | -4.157700 | -0.467500 |
| H | 8.169400  | -0.975900 | 0.193800  |
| H | 7.564200  | 1.523800  | 0.129500  |
| H | 2.766200  | 0.844400  | -0.777300 |
| H | 1.777500  | -0.602600 | -1.019800 |
| H | 1.978800  | -3.010200 | -0.372500 |
| H | -3.025700 | -5.393500 | 1.280100  |
| H | -4.470400 | -3.516700 | 0.210000  |
| H | 2.885400  | -4.537900 | 1.114800  |
| H | 1.947800  | -5.830800 | 1.721100  |
| H | -4.554800 | 4.157700  | -0.467500 |
| H | -8.169400 | 0.975900  | 0.193800  |
| H | -7.564200 | -1.523800 | 0.129500  |
| H | -2.766200 | -0.844400 | -0.777300 |
| H | -1.777500 | 0.602600  | -1.019800 |
| H | -1.978800 | 3.010200  | -0.372500 |
| H | 3.025700  | 5.393500  | 1.280100  |
| H | 4.470400  | 3.516700  | 0.210000  |
| H | -2.885400 | 4.537900  | 1.114800  |
| H | -1.947800 | 5.830800  | 1.721100  |

**(I')<sub>2</sub> gas phase C<sub>2h</sub> E = -9564.2519**

|   |           |           |          |
|---|-----------|-----------|----------|
| N | 3.701000  | -2.169100 | 0.000000 |
| C | 4.837000  | -2.893700 | 0.000000 |
| N | 6.110600  | -2.485900 | 0.000000 |
| C | 6.175200  | -1.136800 | 0.000000 |
| C | 5.101100  | -0.235500 | 0.000000 |
| C | 3.784900  | -0.793900 | 0.000000 |
| N | 7.308000  | -0.343600 | 0.000000 |
| C | 6.871700  | 0.973100  | 0.000000 |
| N | 5.558100  | 1.082400  | 0.000000 |
| N | 2.678500  | -0.053800 | 0.000000 |
| N | 1.115100  | -3.528300 | 0.000000 |
| C | 1.019500  | -4.899900 | 0.000000 |
| N | -0.123500 | -5.577800 | 0.000000 |
| C | -1.207400 | -4.763700 | 0.000000 |
| C | -1.235100 | -3.367200 | 0.000000 |
| C | -0.000200 | -2.643300 | 0.000000 |
| N | -2.538400 | -5.139100 | 0.000000 |
| C | -3.294600 | -3.968800 | 0.000000 |
| N | -2.538400 | -2.893800 | 0.000000 |
| O | 0.159100  | -1.417700 | 0.000000 |
| N | 2.194500  | -5.600400 | 0.000000 |
| N | -3.701000 | 2.169100  | 0.000000 |
| C | -4.837000 | 2.893700  | 0.000000 |
| N | -6.110600 | 2.485900  | 0.000000 |



|   |           |           |          |
|---|-----------|-----------|----------|
| C | -6.175200 | 1.136800  | 0.000000 |
| C | -5.101100 | 0.235500  | 0.000000 |
| C | -3.784900 | 0.793900  | 0.000000 |
| N | -7.308000 | 0.343600  | 0.000000 |
| C | -6.871700 | -0.973100 | 0.000000 |
| N | -5.558100 | -1.082400 | 0.000000 |
| N | -2.678500 | 0.053800  | 0.000000 |
| N | -1.115100 | 3.528300  | 0.000000 |
| C | -1.019500 | 4.899900  | 0.000000 |
| N | 0.123500  | 5.577800  | 0.000000 |
| C | 1.207400  | 4.763700  | 0.000000 |
| C | 1.235100  | 3.367200  | 0.000000 |
| C | 0.000200  | 2.643300  | 0.000000 |
| N | 2.538400  | 5.139100  | 0.000000 |
| C | 3.294600  | 3.968800  | 0.000000 |
| N | 2.538400  | 2.893800  | 0.000000 |
| O | -0.159100 | 1.417700  | 0.000000 |
| N | -2.194500 | 5.600400  | 0.000000 |
| H | 4.704100  | -3.977100 | 0.000000 |
| H | 8.263000  | -0.679600 | 0.000000 |
| H | 7.571200  | 1.798600  | 0.000000 |
| H | 2.739300  | 0.973200  | 0.000000 |
| H | 1.748600  | -0.491700 | 0.000000 |
| H | 2.054100  | -3.055800 | 0.000000 |
| H | -2.881500 | -6.091700 | 0.000000 |
| H | -4.375500 | -3.967600 | 0.000000 |
| H | 3.089800  | -5.138300 | 0.000000 |
| H | 2.149200  | -6.608300 | 0.000000 |
| H | -4.704100 | 3.977100  | 0.000000 |
| H | -8.263000 | 0.679600  | 0.000000 |
| H | -7.571200 | -1.798600 | 0.000000 |
| H | -2.739300 | -0.973200 | 0.000000 |
| H | -1.748600 | 0.491700  | 0.000000 |
| H | -2.054100 | 3.055800  | 0.000000 |
| H | 2.881500  | 6.091700  | 0.000000 |
| H | 4.375500  | 3.967600  | 0.000000 |
| H | -3.089800 | 5.138300  | 0.000000 |
| H | -2.149200 | 6.608300  | 0.000000 |

**(I')<sub>2</sub> water C<sub>2</sub>            E = -9611.1227**

|   |          |           |           |
|---|----------|-----------|-----------|
| N | 3.645100 | -2.312300 | -0.654500 |
| C | 4.721200 | -3.080600 | -0.385900 |
| N | 5.980600 | -2.693500 | -0.139100 |
| C | 6.100100 | -1.346100 | -0.188100 |
| C | 5.078500 | -0.423100 | -0.467100 |
| C | 3.782900 | -0.950800 | -0.715700 |
| N | 7.228100 | -0.582000 | 0.012300  |
| C | 6.857500 | 0.735400  | -0.152700 |
| N | 5.573700 | 0.880400  | -0.443900 |

|   |           |           |           |
|---|-----------|-----------|-----------|
| N | 2.714500  | -0.193800 | -1.011400 |
| N | 1.003900  | -3.269600 | -0.052400 |
| C | 0.870900  | -4.309800 | 0.837400  |
| N | -0.300800 | -4.815800 | 1.215500  |
| C | -1.354000 | -4.187100 | 0.638000  |
| C | -1.324600 | -3.115400 | -0.263600 |
| C | -0.064100 | -2.579500 | -0.659700 |
| N | -2.691200 | -4.440800 | 0.843600  |
| C | -3.405000 | -3.529300 | 0.089900  |
| N | -2.616400 | -2.718400 | -0.593200 |
| O | 0.157700  | -1.618900 | -1.432400 |
| N | 2.032800  | -4.868000 | 1.307400  |
| N | -3.645100 | 2.312300  | -0.654500 |
| C | -4.721200 | 3.080600  | -0.385900 |
| N | -5.980600 | 2.693500  | -0.139100 |
| C | -6.100100 | 1.346100  | -0.188100 |
| C | -5.078500 | 0.423100  | -0.467100 |
| C | -3.782900 | 0.950800  | -0.715700 |
| N | -7.228100 | 0.582000  | 0.012300  |
| C | -6.857500 | -0.735400 | -0.152700 |
| N | -5.573700 | -0.880400 | -0.443900 |
| N | -2.714500 | 0.193800  | -1.011400 |
| N | -1.003900 | 3.269600  | -0.052400 |
| C | -0.870900 | 4.309800  | 0.837400  |
| N | 0.300800  | 4.815800  | 1.215500  |
| C | 1.354000  | 4.187100  | 0.638000  |
| C | 1.324600  | 3.115400  | -0.263600 |
| C | 0.064100  | 2.579500  | -0.659700 |
| N | 2.691200  | 4.440800  | 0.843600  |
| C | 3.405000  | 3.529300  | 0.089900  |
| N | 2.616400  | 2.718400  | -0.593200 |
| O | -0.157700 | 1.618900  | -1.432400 |
| N | -2.032800 | 4.868000  | 1.307400  |
| H | 4.535900  | -4.153400 | -0.370300 |
| H | 8.156700  | -0.924100 | 0.234700  |
| H | 7.573300  | 1.539300  | -0.048700 |
| H | 2.775200  | 0.832300  | -0.960300 |
| H | 1.800600  | -0.631800 | -1.169000 |
| H | 1.966800  | -2.950800 | -0.321000 |
| H | -3.079900 | -5.153600 | 1.451700  |
| H | -4.484500 | -3.492200 | 0.093900  |
| H | 2.851300  | -4.270300 | 1.355600  |
| H | 1.919900  | -5.476500 | 2.112000  |
| H | -4.535900 | 4.153400  | -0.370300 |
| H | -8.156700 | 0.924100  | 0.234700  |
| H | -7.573300 | -1.539300 | -0.048700 |
| H | -2.775200 | -0.832300 | -0.960300 |
| H | -1.800600 | 0.631800  | -1.169000 |
| H | -1.966800 | 2.950800  | -0.321000 |
| H | 3.079900  | 5.153600  | 1.451700  |

|   |           |          |          |
|---|-----------|----------|----------|
| H | 4.484500  | 3.492200 | 0.093900 |
| H | -2.851300 | 4.270300 | 1.355600 |
| H | -1.919900 | 5.476500 | 2.112000 |

**(I')<sub>2</sub> water C<sub>2h</sub>                    E = -9608.9406**

|   |           |           |          |
|---|-----------|-----------|----------|
| N | 3.706800  | -2.168500 | 0.000000 |
| C | 4.840400  | -2.898300 | 0.000000 |
| N | 6.113700  | -2.477900 | 0.000000 |
| C | 6.183900  | -1.125800 | 0.000000 |
| C | 5.100300  | -0.234700 | 0.000000 |
| C | 3.795100  | -0.798700 | 0.000000 |
| N | 7.306000  | -0.326600 | 0.000000 |
| C | 6.868800  | 0.981000  | 0.000000 |
| N | 5.548400  | 1.086600  | 0.000000 |
| N | 2.676800  | -0.060000 | 0.000000 |
| N | 1.104500  | -3.559100 | 0.000000 |
| C | 1.017000  | -4.936000 | 0.000000 |
| N | -0.138600 | -5.606200 | 0.000000 |
| C | -1.221600 | -4.792700 | 0.000000 |
| C | -1.238000 | -3.393600 | 0.000000 |
| C | -0.002800 | -2.686900 | 0.000000 |
| N | -2.549000 | -5.160300 | 0.000000 |
| C | -3.299500 | -3.997400 | 0.000000 |
| N | -2.543900 | -2.914300 | 0.000000 |
| O | 0.157000  | -1.446100 | 0.000000 |
| N | 2.180900  | -5.629200 | 0.000000 |
| N | -3.706800 | 2.168500  | 0.000000 |
| C | -4.840400 | 2.898300  | 0.000000 |
| N | -6.113700 | 2.477900  | 0.000000 |
| C | -6.183900 | 1.125800  | 0.000000 |
| C | -5.100300 | 0.234700  | 0.000000 |
| C | -3.795100 | 0.798700  | 0.000000 |
| N | -7.306000 | 0.326600  | 0.000000 |
| C | -6.868800 | -0.981000 | 0.000000 |
| N | -5.548400 | -1.086600 | 0.000000 |
| N | -2.676800 | 0.060000  | 0.000000 |
| N | -1.104500 | 3.559100  | 0.000000 |
| C | -1.017000 | 4.936000  | 0.000000 |
| N | 0.138600  | 5.606200  | 0.000000 |
| C | 1.221600  | 4.792700  | 0.000000 |
| C | 1.238000  | 3.393600  | 0.000000 |
| C | 0.002800  | 2.686900  | 0.000000 |
| N | 2.549000  | 5.160300  | 0.000000 |
| C | 3.299500  | 3.997400  | 0.000000 |
| N | 2.543900  | 2.914300  | 0.000000 |
| O | -0.157000 | 1.446100  | 0.000000 |
| N | -2.180900 | 5.629200  | 0.000000 |
| H | 4.707400  | -3.978600 | 0.000000 |
| H | 8.270500  | -0.639900 | 0.000000 |

|   |           |           |          |
|---|-----------|-----------|----------|
| H | 7.565800  | 1.807900  | 0.000000 |
| H | 2.728800  | 0.968000  | 0.000000 |
| H | 1.756300  | -0.516600 | 0.000000 |
| H | 2.041700  | -3.092600 | 0.000000 |
| H | -2.910500 | -6.108000 | 0.000000 |
| H | -4.380000 | -4.008200 | 0.000000 |
| H | 3.080000  | -5.171500 | 0.000000 |
| H | 2.152900  | -6.639800 | 0.000000 |
| H | -4.707400 | 3.978600  | 0.000000 |
| H | -8.270500 | 0.639900  | 0.000000 |
| H | -7.565800 | -1.807900 | 0.000000 |
| H | -2.728800 | -0.968000 | 0.000000 |
| H | -1.756300 | 0.516600  | 0.000000 |
| H | -2.041700 | 3.092600  | 0.000000 |
| H | 2.910500  | 6.108000  | 0.000000 |
| H | 4.380000  | 4.008200  | 0.000000 |
| H | -3.080000 | 5.171500  | 0.000000 |
| H | -2.152900 | 6.639800  | 0.000000 |

**(I'')<sub>2</sub> gas phase C<sub>2</sub> E = -9563.9575**

|   |           |           |           |
|---|-----------|-----------|-----------|
| N | 3.133500  | 2.329100  | 0.643500  |
| C | 2.927800  | 3.506000  | 0.006600  |
| N | 1.777700  | 4.156300  | -0.205800 |
| C | 0.733400  | 3.480200  | 0.313900  |
| C | 0.786200  | 2.265400  | 1.012600  |
| C | 2.060000  | 1.659600  | 1.164900  |
| N | -0.614100 | 3.790200  | 0.245800  |
| C | -1.300700 | 2.769100  | 0.879900  |
| N | -0.491300 | 1.841500  | 1.360500  |
| N | 2.240100  | 0.476000  | 1.784000  |
| N | -5.407900 | -0.668700 | -0.011000 |
| C | -6.455600 | -1.320000 | -0.613100 |
| N | -7.447800 | -0.715200 | -1.245800 |
| C | -7.307700 | 0.633600  | -1.248100 |
| C | -6.308000 | 1.414600  | -0.646300 |
| C | -5.253000 | 0.746300  | 0.061300  |
| N | -8.156800 | 1.541500  | -1.841000 |
| C | -7.639400 | 2.807800  | -1.578000 |
| N | -6.536300 | 2.768600  | -0.864500 |
| O | -4.293600 | 1.235300  | 0.680400  |
| N | -6.420700 | -2.701400 | -0.570300 |
| N | -3.133500 | -2.329100 | 0.643500  |
| C | -2.927800 | -3.506000 | 0.006600  |
| N | -1.777700 | -4.156300 | -0.205800 |
| C | -0.733400 | -3.480200 | 0.313900  |
| C | -0.786200 | -2.265400 | 1.012600  |
| C | -2.060000 | -1.659600 | 1.164900  |
| N | 0.614100  | -3.790200 | 0.245800  |
| C | 1.300700  | -2.769100 | 0.879900  |

|   |           |           |           |
|---|-----------|-----------|-----------|
| N | 0.491300  | -1.841500 | 1.360500  |
| N | -2.240100 | -0.476000 | 1.784000  |
| N | 5.407900  | 0.668700  | -0.011000 |
| C | 6.455600  | 1.320000  | -0.613100 |
| N | 7.447800  | 0.715200  | -1.245800 |
| C | 7.307700  | -0.633600 | -1.248100 |
| C | 6.308000  | -1.414600 | -0.646300 |
| C | 5.253000  | -0.746300 | 0.061300  |
| N | 8.156800  | -1.541500 | -1.841000 |
| C | 7.639400  | -2.807800 | -1.578000 |
| N | 6.536300  | -2.768600 | -0.864500 |
| O | 4.293600  | -1.235300 | 0.680400  |
| N | 6.420700  | 2.701400  | -0.570300 |
| H | 3.819300  | 3.973900  | -0.407300 |
| H | -1.015300 | 4.594600  | -0.220900 |
| H | -2.382800 | 2.739400  | 0.927900  |
| H | 1.423400  | -0.140900 | 1.865800  |
| H | 3.099800  | -0.040900 | 1.567100  |
| H | -4.605700 | -1.252700 | 0.329300  |
| H | 7.291100  | 3.143400  | -0.843700 |
| H | -8.126200 | 3.702700  | -1.942000 |
| H | -5.953500 | -3.125300 | 0.223300  |
| H | -7.291100 | -3.143400 | -0.843700 |
| H | -3.819300 | -3.973900 | -0.407300 |
| H | 1.015300  | -4.594600 | -0.220900 |
| H | 2.382800  | -2.739400 | 0.927900  |
| H | -1.423400 | 0.140900  | 1.865800  |
| H | -3.099800 | 0.040900  | 1.567100  |
| H | 4.605700  | 1.252700  | 0.329300  |
| H | 5.953500  | 3.125300  | 0.223300  |
| H | 8.126200  | -3.702700 | -1.942000 |
| H | 8.991600  | -1.309800 | -2.365500 |
| H | -8.991600 | 1.309800  | -2.365500 |

**(I'')<sub>2</sub> gas phase C<sub>2h</sub> E = -9563.3165**

|   |           |           |          |
|---|-----------|-----------|----------|
| N | 3.368700  | 2.324300  | 0.000000 |
| C | 3.293500  | 3.673400  | 0.000000 |
| N | 2.216000  | 4.467200  | 0.000000 |
| C | 1.081300  | 3.736700  | 0.000000 |
| C | 0.987900  | 2.340200  | 0.000000 |
| C | 2.202600  | 1.600000  | 0.000000 |
| N | -0.231500 | 4.180000  | 0.000000 |
| C | -1.039600 | 3.056600  | 0.000000 |
| N | -0.340700 | 1.935600  | 0.000000 |
| N | 2.237600  | 0.266500  | 0.000000 |
| N | -5.809800 | -0.632700 | 0.000000 |
| C | -6.997300 | -1.327100 | 0.000000 |
| N | -8.194000 | -0.758400 | 0.000000 |
| C | -8.120000 | 0.594000  | 0.000000 |

|   |            |           |          |
|---|------------|-----------|----------|
| C | -6.979800  | 1.414200  | 0.000000 |
| C | -5.689800  | 0.788700  | 0.000000 |
| N | -9.183900  | 1.468600  | 0.000000 |
| C | -8.647800  | 2.755500  | 0.000000 |
| N | -7.334300  | 2.759200  | 0.000000 |
| O | -4.565300  | 1.318600  | 0.000000 |
| N | -6.908400  | -2.690800 | 0.000000 |
| N | -3.368700  | -2.324300 | 0.000000 |
| C | -3.293500  | -3.673400 | 0.000000 |
| N | -2.216000  | -4.467200 | 0.000000 |
| C | -1.081300  | -3.736700 | 0.000000 |
| C | -0.987900  | -2.340200 | 0.000000 |
| C | -2.202600  | -1.600000 | 0.000000 |
| N | 0.231500   | -4.180000 | 0.000000 |
| C | 1.039600   | -3.056600 | 0.000000 |
| N | 0.340700   | -1.935600 | 0.000000 |
| N | -2.237600  | -0.266500 | 0.000000 |
| N | 5.809800   | 0.632700  | 0.000000 |
| C | 6.997300   | 1.327100  | 0.000000 |
| N | 8.194000   | 0.758400  | 0.000000 |
| C | 8.120000   | -0.594000 | 0.000000 |
| C | 6.979800   | -1.414200 | 0.000000 |
| C | 5.689800   | -0.788700 | 0.000000 |
| N | 9.183900   | -1.468600 | 0.000000 |
| C | 8.647800   | -2.755500 | 0.000000 |
| N | 7.334300   | -2.759200 | 0.000000 |
| O | 4.565300   | -1.318600 | 0.000000 |
| N | 6.908400   | 2.690800  | 0.000000 |
| H | 4.249200   | 4.199500  | 0.000000 |
| H | -0.530700  | 5.147500  | 0.000000 |
| H | -2.121400  | 3.115500  | 0.000000 |
| H | 1.379500   | -0.297000 | 0.000000 |
| H | 3.127300   | -0.252500 | 0.000000 |
| H | -4.926600  | -1.187300 | 0.000000 |
| H | 7.763500   | 3.226200  | 0.000000 |
| H | -9.283300  | 3.630900  | 0.000000 |
| H | -6.017300  | -3.161200 | 0.000000 |
| H | -7.763500  | -3.226200 | 0.000000 |
| H | -4.249200  | -4.199500 | 0.000000 |
| H | 0.530700   | -5.147500 | 0.000000 |
| H | 2.121400   | -3.115500 | 0.000000 |
| H | -1.379500  | 0.297000  | 0.000000 |
| H | -3.127300  | 0.252500  | 0.000000 |
| H | 4.926600   | 1.187300  | 0.000000 |
| H | 6.017300   | 3.161200  | 0.000000 |
| H | 9.283300   | -3.630900 | 0.000000 |
| H | 10.161400  | -1.204200 | 0.000000 |
| H | -10.161400 | 1.204200  | 0.000000 |

| <b>(I'')<sub>2</sub> water C<sub>2</sub></b> |           | <b>E = -9610.9181</b> |           |
|----------------------------------------------|-----------|-----------------------|-----------|
| N                                            | 3.457100  | 2.188400              | 0.526700  |
| C                                            | 3.422700  | 3.512500              | 0.266000  |
| N                                            | 2.354700  | 4.321600              | 0.186300  |
| C                                            | 1.205000  | 3.644000              | 0.406600  |
| C                                            | 1.087300  | 2.273800              | 0.687100  |
| C                                            | 2.284400  | 1.515300              | 0.738900  |
| N                                            | -0.089600 | 4.119700              | 0.389600  |
| C                                            | -0.916900 | 3.052800              | 0.649600  |
| N                                            | -0.251800 | 1.921000              | 0.836800  |
| N                                            | 2.317500  | 0.194900              | 0.993600  |
| N                                            | -5.884800 | -0.667700             | 0.091800  |
| C                                            | -7.023600 | -1.388800             | -0.186500 |
| N                                            | -8.123700 | -0.860300             | -0.715900 |
| C                                            | -8.004100 | 0.469100              | -0.953600 |
| C                                            | -6.908900 | 1.301600              | -0.675500 |
| C                                            | -5.737100 | 0.720000              | -0.105200 |
| N                                            | -8.950400 | 1.298400              | -1.506300 |
| C                                            | -8.409700 | 2.569500              | -1.542200 |
| N                                            | -7.182800 | 2.616400              | -1.050800 |
| O                                            | -4.664100 | 1.294000              | 0.206100  |
| N                                            | -6.969700 | -2.735900             | 0.065800  |
| N                                            | -3.457100 | -2.188400             | 0.526700  |
| C                                            | -3.422700 | -3.512500             | 0.266000  |
| N                                            | -2.354700 | -4.321600             | 0.186300  |
| C                                            | -1.205000 | -3.644000             | 0.406600  |
| C                                            | -1.087300 | -2.273800             | 0.687100  |
| C                                            | -2.284400 | -1.515300             | 0.738900  |
| N                                            | 0.089600  | -4.119700             | 0.389600  |
| C                                            | 0.916900  | -3.052800             | 0.649600  |
| N                                            | 0.251800  | -1.921000             | 0.836800  |
| N                                            | -2.317500 | -0.194900             | 0.993600  |
| N                                            | 5.884800  | 0.667700              | 0.091800  |
| C                                            | 7.023600  | 1.388800              | -0.186500 |
| N                                            | 8.123700  | 0.860300              | -0.715900 |
| C                                            | 8.004100  | -0.469100             | -0.953600 |
| C                                            | 6.908900  | -1.301600             | -0.675500 |
| C                                            | 5.737100  | -0.720000             | -0.105200 |
| N                                            | 8.950400  | -1.298400             | -1.506300 |
| C                                            | 8.409700  | -2.569500             | -1.542200 |
| N                                            | 7.182800  | -2.616400             | -1.050800 |
| O                                            | 4.664100  | -1.294000             | 0.206100  |
| N                                            | 6.969700  | 2.735900              | 0.065800  |
| H                                            | 4.387500  | 3.980800              | 0.088200  |
| H                                            | -0.379500 | 5.074400              | 0.208700  |
| H                                            | -1.992200 | 3.159700              | 0.685900  |
| H                                            | 1.448600  | -0.353200             | 0.991600  |
| H                                            | 3.187900  | -0.319700             | 0.808400  |
| H                                            | -5.020800 | -1.198300             | 0.357000  |
| H                                            | 7.862900  | 3.215600              | 0.022000  |

|   |           |           |           |
|---|-----------|-----------|-----------|
| H | -8.964600 | 3.407700  | -1.938600 |
| H | -6.372400 | -3.043800 | 0.825200  |
| H | -7.862900 | -3.215600 | 0.022000  |
| H | -4.387500 | -3.980800 | 0.088200  |
| H | 0.379500  | -5.074400 | 0.208700  |
| H | 1.992200  | -3.159700 | 0.685900  |
| H | -1.448600 | 0.353200  | 0.991600  |
| H | -3.187900 | 0.319700  | 0.808400  |
| H | 5.020800  | 1.198300  | 0.357000  |
| H | 6.372400  | 3.043800  | 0.825200  |
| H | 8.964600  | -3.407700 | -1.938600 |
| H | 9.874100  | -1.027500 | -1.825500 |
| H | -9.874100 | 1.027500  | -1.825500 |

**(I'')<sub>2</sub> water C<sub>2h</sub>            E = -9609.9236**

|   |           |           |          |
|---|-----------|-----------|----------|
| N | 3.466300  | 2.232800  | 0.000000 |
| C | 3.431400  | 3.581600  | 0.000000 |
| N | 2.366800  | 4.397900  | 0.000000 |
| C | 1.209900  | 3.695800  | 0.000000 |
| C | 1.086700  | 2.299000  | 0.000000 |
| C | 2.284600  | 1.537100  | 0.000000 |
| N | -0.085100 | 4.171300  | 0.000000 |
| C | -0.918200 | 3.077500  | 0.000000 |
| N | -0.255800 | 1.928500  | 0.000000 |
| N | 2.304900  | 0.197700  | 0.000000 |
| N | -5.979100 | -0.678000 | 0.000000 |
| C | -7.166500 | -1.381400 | 0.000000 |
| N | -8.368600 | -0.802100 | 0.000000 |
| C | -8.300300 | 0.549600  | 0.000000 |
| C | -7.153100 | 1.358300  | 0.000000 |
| C | -5.874800 | 0.728400  | 0.000000 |
| N | -9.355700 | 1.430600  | 0.000000 |
| C | -8.824200 | 2.707100  | 0.000000 |
| N | -7.502200 | 2.709400  | 0.000000 |
| O | -4.746700 | 1.281800  | 0.000000 |
| N | -7.083200 | -2.733100 | 0.000000 |
| N | -3.466300 | -2.232800 | 0.000000 |
| C | -3.431400 | -3.581600 | 0.000000 |
| N | -2.366800 | -4.397900 | 0.000000 |
| C | -1.209900 | -3.695800 | 0.000000 |
| C | -1.086700 | -2.299000 | 0.000000 |
| C | -2.284600 | -1.537100 | 0.000000 |
| N | 0.085100  | -4.171300 | 0.000000 |
| C | 0.918200  | -3.077500 | 0.000000 |
| N | 0.255800  | -1.928500 | 0.000000 |
| N | -2.304900 | -0.197700 | 0.000000 |
| N | 5.979100  | 0.678000  | 0.000000 |
| C | 7.166500  | 1.381400  | 0.000000 |
| N | 8.368600  | 0.802100  | 0.000000 |



|   |            |           |          |
|---|------------|-----------|----------|
| C | 8.300300   | -0.549600 | 0.000000 |
| C | 7.153100   | -1.358300 | 0.000000 |
| C | 5.874800   | -0.728400 | 0.000000 |
| N | 9.355700   | -1.430600 | 0.000000 |
| C | 8.824200   | -2.707100 | 0.000000 |
| N | 7.502200   | -2.709400 | 0.000000 |
| O | 4.746700   | -1.281800 | 0.000000 |
| N | 7.083200   | 2.733100  | 0.000000 |
| H | 4.397500   | 4.081800  | 0.000000 |
| H | -0.371300  | 5.144100  | 0.000000 |
| H | -1.994500  | 3.179300  | 0.000000 |
| H | 1.438700   | -0.353700 | 0.000000 |
| H | 3.201000   | -0.306200 | 0.000000 |
| H | -5.083200  | -1.215900 | 0.000000 |
| H | 7.932700   | 3.280900  | 0.000000 |
| H | -9.458200  | 3.582100  | 0.000000 |
| H | -6.198000  | -3.215300 | 0.000000 |
| H | -7.932700  | -3.280900 | 0.000000 |
| H | -4.397500  | -4.081800 | 0.000000 |
| H | 0.371300   | -5.144100 | 0.000000 |
| H | 1.994500   | -3.179300 | 0.000000 |
| H | -1.438700  | 0.353700  | 0.000000 |
| H | -3.201000  | 0.306200  | 0.000000 |
| H | 5.083200   | 1.215900  | 0.000000 |
| H | 6.198000   | 3.215300  | 0.000000 |
| H | 9.458200   | -3.582100 | 0.000000 |
| H | 10.340400  | -1.188000 | 0.000000 |
| H | -10.340400 | 1.188000  | 0.000000 |

**(H)<sub>2</sub> water C<sub>2</sub>                    E = -9606.8426**

|   |           |           |           |
|---|-----------|-----------|-----------|
| N | -4.094200 | -0.458800 | -0.523100 |
| C | -5.456900 | -0.338300 | -0.677000 |
| N | -6.062300 | 0.788500  | -1.042400 |
| C | -5.192400 | 1.805200  | -1.262700 |
| C | -3.791100 | 1.776700  | -1.173600 |
| C | -3.164100 | 0.565200  | -0.763700 |
| N | -5.496900 | 3.087100  | -1.652200 |
| C | -4.299600 | 3.767300  | -1.788300 |
| N | -3.248900 | 3.015100  | -1.510700 |
| O | -1.936000 | 0.346900  | -0.603300 |
| N | -6.204600 | -1.449700 | -0.381000 |
| H | -6.425200 | 3.462100  | -1.814000 |
| H | -3.715600 | -1.346200 | -0.116000 |
| N | 4.094200  | 0.458800  | -0.523100 |
| C | 5.456900  | 0.338300  | -0.677000 |
| N | 6.062300  | -0.788500 | -1.042400 |
| C | 5.192400  | -1.805200 | -1.262700 |
| C | 3.791100  | -1.776700 | -1.173600 |
| C | 3.164100  | -0.565200 | -0.763700 |

|   |           |           |           |
|---|-----------|-----------|-----------|
| N | 5.496900  | -3.087100 | -1.652200 |
| C | 4.299600  | -3.767300 | -1.788300 |
| N | 3.248900  | -3.015100 | -1.510700 |
| O | 1.936000  | -0.346900 | -0.603300 |
| N | 6.204600  | 1.449700  | -0.381000 |
| H | 6.425200  | -3.462100 | -1.814000 |
| H | 3.715600  | 1.346200  | -0.116000 |
| N | -0.346300 | 4.017600  | 0.865800  |
| C | -0.051700 | 5.126000  | 1.571500  |
| N | 1.145600  | 5.546900  | 2.023900  |
| C | 2.128400  | 4.689900  | 1.672700  |
| C | 1.978900  | 3.509800  | 0.926800  |
| C | 0.661800  | 3.165000  | 0.519800  |
| N | 3.475800  | 4.765200  | 1.965700  |
| C | 4.076500  | 3.666100  | 1.407000  |
| N | 3.216800  | 2.883300  | 0.767200  |
| N | 0.373700  | 2.056900  | -0.189900 |
| H | 3.937600  | 5.493100  | 2.499600  |
| N | 0.346300  | -4.017600 | 0.865800  |
| C | 0.051700  | -5.126000 | 1.571500  |
| N | -1.145600 | -5.546900 | 2.023900  |
| C | -2.128400 | -4.689900 | 1.672700  |
| C | -1.978900 | -3.509800 | 0.926800  |
| C | -0.661800 | -3.165000 | 0.519800  |
| N | -3.475800 | -4.765200 | 1.965700  |
| C | -4.076500 | -3.666100 | 1.407000  |
| N | -3.216800 | -2.883300 | 0.767200  |
| N | -0.373700 | -2.056900 | -0.189900 |
| H | -3.937600 | -5.493100 | 2.499600  |
| H | -0.598900 | 1.777300  | -0.335900 |
| H | 1.073900  | 1.319700  | -0.314500 |
| H | -1.073900 | -1.319700 | -0.314500 |
| H | 0.598900  | -1.777300 | -0.335900 |
| H | -7.174400 | -1.403000 | -0.676200 |
| H | -5.770500 | -2.353600 | -0.534300 |
| H | 5.770500  | 2.353600  | -0.534300 |
| H | 7.174400  | 1.403000  | -0.676200 |
| H | 5.136800  | 3.484000  | 1.505600  |
| H | -5.136800 | -3.484000 | 1.505600  |
| H | -4.272100 | 4.803100  | -2.095300 |
| H | 4.272100  | -4.803100 | -2.095300 |
| H | -0.899000 | 5.764500  | 1.813300  |
| H | 0.899000  | -5.764500 | 1.813300  |

**(II)<sub>2</sub> water C<sub>2h</sub>            E = -9599.7698**

|   |           |           |          |
|---|-----------|-----------|----------|
| N | -4.344200 | -0.341000 | 0.000000 |
| C | -5.719900 | -0.225500 | 0.000000 |
| N | -6.362500 | 0.942700  | 0.000000 |
| C | -5.523100 | 2.003100  | 0.000000 |

|   |           |           |          |
|---|-----------|-----------|----------|
| C | -4.116700 | 1.999100  | 0.000000 |
| C | -3.442000 | 0.742100  | 0.000000 |
| N | -5.876900 | 3.330300  | 0.000000 |
| C | -4.702600 | 4.064100  | 0.000000 |
| N | -3.623800 | 3.304200  | 0.000000 |
| O | -2.203500 | 0.518900  | 0.000000 |
| N | -6.440300 | -1.372000 | 0.000000 |
| H | -6.821300 | 3.699800  | 0.000000 |
| H | -3.927200 | -1.296000 | 0.000000 |
| N | 4.344200  | 0.341000  | 0.000000 |
| C | 5.719900  | 0.225500  | 0.000000 |
| N | 6.362500  | -0.942700 | 0.000000 |
| C | 5.523100  | -2.003100 | 0.000000 |
| C | 4.116700  | -1.999100 | 0.000000 |
| C | 3.442000  | -0.742100 | 0.000000 |
| N | 5.876900  | -3.330300 | 0.000000 |
| C | 4.702600  | -4.064100 | 0.000000 |
| N | 3.623800  | -3.304200 | 0.000000 |
| O | 2.203500  | -0.518900 | 0.000000 |
| N | 6.440300  | 1.372000  | 0.000000 |
| H | 6.821300  | -3.699800 | 0.000000 |
| H | 3.927200  | 1.296000  | 0.000000 |
| N | -0.265000 | 4.031700  | 0.000000 |
| C | -0.022300 | 5.351400  | 0.000000 |
| N | 1.165600  | 5.989300  | 0.000000 |
| C | 2.187400  | 5.107600  | 0.000000 |
| C | 2.092300  | 3.703800  | 0.000000 |
| C | 0.780100  | 3.156500  | 0.000000 |
| N | 3.540000  | 5.379300  | 0.000000 |
| C | 4.195300  | 4.176300  | 0.000000 |
| N | 3.371300  | 3.136200  | 0.000000 |
| N | 0.502500  | 1.838100  | 0.000000 |
| H | 3.971600  | 6.296800  | 0.000000 |
| N | 0.265000  | -4.031700 | 0.000000 |
| C | 0.022300  | -5.351400 | 0.000000 |
| N | -1.165600 | -5.989300 | 0.000000 |
| C | -2.187400 | -5.107600 | 0.000000 |
| C | -2.092300 | -3.703800 | 0.000000 |
| C | -0.780100 | -3.156500 | 0.000000 |
| N | -3.540000 | -5.379300 | 0.000000 |
| C | -4.195300 | -4.176300 | 0.000000 |
| N | -3.371300 | -3.136200 | 0.000000 |
| N | -0.502500 | -1.838100 | 0.000000 |
| H | -3.971600 | -6.296800 | 0.000000 |
| H | -0.475600 | 1.541100  | 0.000000 |
| H | 1.236900  | 1.126200  | 0.000000 |
| H | -1.236900 | -1.126200 | 0.000000 |
| H | 0.475600  | -1.541100 | 0.000000 |
| H | -7.449600 | -1.320900 | 0.000000 |
| H | -6.002400 | -2.278000 | 0.000000 |

|   |           |           |          |
|---|-----------|-----------|----------|
| H | 6.002400  | 2.278000  | 0.000000 |
| H | 7.449600  | 1.320900  | 0.000000 |
| H | 5.274800  | 4.137300  | 0.000000 |
| H | -5.274800 | -4.137300 | 0.000000 |
| H | -4.715300 | 5.145000  | 0.000000 |
| H | 4.715300  | -5.145000 | 0.000000 |
| H | -0.903800 | 5.989900  | 0.000000 |
| H | 0.903800  | -5.989900 | 0.000000 |

**(II')<sub>2</sub> gas phase C<sub>2</sub> E = -9562.1110**

|   |           |           |           |
|---|-----------|-----------|-----------|
| N | -3.734500 | -0.931400 | -0.028300 |
| C | -4.696600 | -0.541900 | 0.868500  |
| N | -4.931000 | 0.713100  | 1.215700  |
| C | -4.089500 | 1.583300  | 0.600700  |
| C | -3.055600 | 1.305100  | -0.302400 |
| C | -2.809400 | -0.059800 | -0.676500 |
| N | -4.036900 | 2.950300  | 0.790000  |
| C | -2.981500 | 3.429500  | 0.024500  |
| N | -2.379700 | 2.467900  | -0.642500 |
| O | -1.943600 | -0.522700 | -1.427800 |
| N | -5.484400 | -1.552100 | 1.401500  |
| H | -4.640600 | 3.482600  | 1.404400  |
| N | 3.734500  | 0.931400  | -0.028300 |
| C | 4.696600  | 0.541900  | 0.868500  |
| N | 4.931000  | -0.713100 | 1.215700  |
| C | 4.089500  | -1.583300 | 0.600700  |
| C | 3.055600  | -1.305100 | -0.302400 |
| C | 2.809400  | 0.059800  | -0.676500 |
| N | 4.036900  | -2.950300 | 0.790000  |
| C | 2.981500  | -3.429500 | 0.024500  |
| N | 2.379700  | -2.467900 | -0.642500 |
| O | 1.943600  | 0.522700  | -1.427800 |
| N | 5.484400  | 1.552100  | 1.401500  |
| H | 4.640600  | -3.482600 | 1.404400  |
| N | -0.041300 | 5.138900  | -0.286700 |
| C | 0.367000  | 6.373600  | 0.045800  |
| N | 1.619000  | 6.843900  | 0.218000  |
| C | 2.517900  | 5.860900  | 0.043600  |
| C | 2.260300  | 4.519000  | -0.275400 |
| C | 0.893900  | 4.159000  | -0.492900 |
| N | 3.899800  | 5.945600  | 0.153500  |
| C | 4.405800  | 4.685000  | -0.084000 |
| N | 3.455900  | 3.799300  | -0.338800 |
| N | 0.493900  | 2.948100  | -0.889600 |
| H | 4.421800  | 6.788600  | 0.359000  |
| N | 0.041300  | -5.138900 | -0.286700 |
| C | -0.367000 | -6.373600 | 0.045800  |
| N | -1.619000 | -6.843900 | 0.218000  |
| C | -2.517900 | -5.860900 | 0.043600  |

|   |           |           |           |
|---|-----------|-----------|-----------|
| C | -2.260300 | -4.519000 | -0.275400 |
| C | -0.893900 | -4.159000 | -0.492900 |
| N | -3.899800 | -5.945600 | 0.153500  |
| C | -4.405800 | -4.685000 | -0.084000 |
| N | -3.455900 | -3.799300 | -0.338800 |
| N | -0.493900 | -2.948100 | -0.889600 |
| H | -4.421800 | -6.788600 | 0.359000  |
| H | -0.514500 | 2.754400  | -0.969100 |
| H | 1.148700  | 2.186400  | -1.092000 |
| H | -1.148700 | -2.186400 | -1.092000 |
| H | 0.514500  | -2.754400 | -0.969100 |
| H | -6.015400 | -1.252100 | 2.212500  |
| H | -5.031600 | -2.454600 | 1.510100  |
| H | 5.031600  | 2.454600  | 1.510100  |
| H | 6.015400  | 1.252100  | 2.212500  |
| H | 5.467000  | 4.474700  | -0.067500 |
| H | -5.467000 | -4.474700 | -0.067500 |
| H | -2.668000 | 4.464800  | 0.022200  |
| H | 2.668000  | -4.464800 | 0.022200  |
| H | -0.428400 | 7.103400  | 0.191700  |
| H | 0.428400  | -7.103400 | 0.191700  |
| H | 3.626400  | 1.946300  | -0.243400 |
| H | -3.626400 | -1.946300 | -0.243400 |

**(II')<sub>2</sub> gas phase C<sub>2h</sub> E = -9558.3743**

|   |           |           |          |
|---|-----------|-----------|----------|
| N | -3.955200 | -0.847800 | 0.000000 |
| C | -5.268300 | -0.438000 | 0.000000 |
| N | -5.662400 | 0.827700  | 0.000000 |
| C | -4.619300 | 1.694700  | 0.000000 |
| C | -3.252000 | 1.401700  | 0.000000 |
| C | -2.829100 | 0.031500  | 0.000000 |
| N | -4.684700 | 3.075100  | 0.000000 |
| C | -3.375500 | 3.546900  | 0.000000 |
| N | -2.500900 | 2.566100  | 0.000000 |
| O | -1.680100 | -0.418200 | 0.000000 |
| N | -6.220900 | -1.421700 | 0.000000 |
| H | -5.535100 | 3.624700  | 0.000000 |
| N | 3.955200  | 0.847800  | 0.000000 |
| C | 5.268300  | 0.438000  | 0.000000 |
| N | 5.662400  | -0.827700 | 0.000000 |
| C | 4.619300  | -1.694700 | 0.000000 |
| C | 3.252000  | -1.401700 | 0.000000 |
| C | 2.829100  | -0.031500 | 0.000000 |
| N | 4.684700  | -3.075100 | 0.000000 |
| C | 3.375500  | -3.546900 | 0.000000 |
| N | 2.500900  | -2.566100 | 0.000000 |
| O | 1.680100  | 0.418200  | 0.000000 |
| N | 6.220900  | 1.421700  | 0.000000 |
| H | 5.535100  | -3.624700 | 0.000000 |

|   |           |           |          |
|---|-----------|-----------|----------|
| N | -0.054700 | 5.217400  | 0.000000 |
| C | 0.392400  | 6.480800  | 0.000000 |
| N | 1.661200  | 6.938500  | 0.000000 |
| C | 2.529500  | 5.913600  | 0.000000 |
| C | 2.237400  | 4.539900  | 0.000000 |
| C | 0.849300  | 4.186100  | 0.000000 |
| N | 3.915100  | 5.988800  | 0.000000 |
| C | 4.389800  | 4.695800  | 0.000000 |
| N | 3.423600  | 3.792200  | 0.000000 |
| N | 0.391900  | 2.934400  | 0.000000 |
| H | 4.456400  | 6.844200  | 0.000000 |
| N | 0.054700  | -5.217400 | 0.000000 |
| C | -0.392400 | -6.480800 | 0.000000 |
| N | -1.661200 | -6.938500 | 0.000000 |
| C | -2.529500 | -5.913600 | 0.000000 |
| C | -2.237400 | -4.539900 | 0.000000 |
| C | -0.849300 | -4.186100 | 0.000000 |
| N | -3.915100 | -5.988800 | 0.000000 |
| C | -4.389800 | -4.695800 | 0.000000 |
| N | -3.423600 | -3.792200 | 0.000000 |
| N | -0.391900 | -2.934400 | 0.000000 |
| H | -4.456400 | -6.844200 | 0.000000 |
| H | -0.627400 | 2.777300  | 0.000000 |
| H | 1.008700  | 2.117000  | 0.000000 |
| H | -1.008700 | -2.117000 | 0.000000 |
| H | 0.627400  | -2.777300 | 0.000000 |
| H | -7.191700 | -1.146900 | 0.000000 |
| H | -5.971100 | -2.396100 | 0.000000 |
| H | 5.971100  | 2.396100  | 0.000000 |
| H | 7.191700  | 1.146900  | 0.000000 |
| H | 5.452900  | 4.492900  | 0.000000 |
| H | -5.452900 | -4.492900 | 0.000000 |
| H | -3.124000 | 4.598900  | 0.000000 |
| H | 3.124000  | -4.598900 | 0.000000 |
| H | -0.379800 | 7.249300  | 0.000000 |
| H | 0.379800  | -7.249300 | 0.000000 |
| H | 3.727800  | 1.863900  | 0.000000 |
| H | -3.727800 | -1.863900 | 0.000000 |

**(H')<sub>2</sub> water C<sub>2</sub>            E = -9610.0965**

|   |           |           |           |
|---|-----------|-----------|-----------|
| N | -3.242500 | -0.874200 | 0.283000  |
| C | -3.867100 | -0.443200 | 1.430300  |
| N | -4.014400 | 0.840700  | 1.750800  |
| C | -3.486900 | 1.675800  | 0.822500  |
| C | -2.824100 | 1.340600  | -0.369100 |
| C | -2.658100 | -0.040200 | -0.691400 |
| N | -3.470400 | 3.051000  | 0.864900  |
| C | -2.814900 | 3.490200  | -0.266900 |
| N | -2.411200 | 2.493000  | -1.037000 |

|   |           |           |           |
|---|-----------|-----------|-----------|
| O | -2.081800 | -0.549200 | -1.681500 |
| N | -4.395300 | -1.410700 | 2.242200  |
| H | -3.855000 | 3.633200  | 1.600900  |
| N | 3.242500  | 0.874200  | 0.283000  |
| C | 3.867100  | 0.443200  | 1.430300  |
| N | 4.014400  | -0.840700 | 1.750800  |
| C | 3.486900  | -1.675800 | 0.822500  |
| C | 2.824100  | -1.340600 | -0.369100 |
| C | 2.658100  | 0.040200  | -0.691400 |
| N | 3.470400  | -3.051000 | 0.864900  |
| C | 2.814900  | -3.490200 | -0.266900 |
| N | 2.411200  | -2.493000 | -1.037000 |
| O | 2.081800  | 0.549200  | -1.681500 |
| N | 4.395300  | 1.410700  | 2.242200  |
| H | 3.855000  | -3.633200 | 1.600900  |
| N | -0.036200 | 5.256400  | -0.999000 |
| C | 0.326000  | 6.471100  | -0.545300 |
| N | 1.506500  | 6.862300  | -0.026100 |
| C | 2.379500  | 5.833900  | 0.031600  |
| C | 2.140000  | 4.514900  | -0.385200 |
| C | 0.867300  | 4.233200  | -0.947400 |
| N | 3.670300  | 5.828700  | 0.523500  |
| C | 4.147900  | 4.548100  | 0.403800  |
| N | 3.260400  | 3.721500  | -0.135900 |
| N | 0.517600  | 3.029800  | -1.444800 |
| H | 4.171300  | 6.619600  | 0.912900  |
| N | 0.036200  | -5.256400 | -0.999000 |
| C | -0.326000 | -6.471100 | -0.545300 |
| N | -1.506500 | -6.862300 | -0.026100 |
| C | -2.379500 | -5.833900 | 0.031600  |
| C | -2.140000 | -4.514900 | -0.385200 |
| C | -0.867300 | -4.233200 | -0.947400 |
| N | -3.670300 | -5.828700 | 0.523500  |
| C | -4.147900 | -4.548100 | 0.403800  |
| N | -3.260400 | -3.721500 | -0.135900 |
| N | -0.517600 | -3.029800 | -1.444800 |
| H | -4.171300 | -6.619600 | 0.912900  |
| H | -0.477600 | 2.838000  | -1.595000 |
| H | 1.159200  | 2.233000  | -1.417700 |
| H | -1.159200 | -2.233000 | -1.417700 |
| H | 0.477600  | -2.838000 | -1.595000 |
| H | -4.655100 | -1.106300 | 3.174100  |
| H | -3.995200 | -2.341400 | 2.194300  |
| H | 3.995200  | 2.341400  | 2.194300  |
| H | 4.655100  | 1.106300  | 3.174100  |
| H | 5.142200  | 4.274400  | 0.725900  |
| H | -5.142200 | -4.274400 | 0.725900  |
| H | -2.631200 | 4.537300  | -0.456800 |
| H | 2.631200  | -4.537300 | -0.456800 |
| H | -0.439000 | 7.241600  | -0.612400 |

|   |           |           |           |
|---|-----------|-----------|-----------|
| H | 0.439000  | -7.241600 | -0.612400 |
| H | 3.232100  | 1.899300  | 0.077400  |
| H | -3.232100 | -1.899300 | 0.077400  |

**(H')<sub>2</sub> water C<sub>2h</sub>      E = -9606.1398**

|   |           |           |          |
|---|-----------|-----------|----------|
| N | -3.967800 | -0.853600 | 0.000000 |
| C | -5.290500 | -0.456500 | 0.000000 |
| N | -5.680900 | 0.820300  | 0.000000 |
| C | -4.642700 | 1.689400  | 0.000000 |
| C | -3.273700 | 1.390800  | 0.000000 |
| C | -2.863400 | 0.025400  | 0.000000 |
| N | -4.707000 | 3.065400  | 0.000000 |
| C | -3.408500 | 3.538500  | 0.000000 |
| N | -2.520000 | 2.561000  | 0.000000 |
| O | -1.693900 | -0.420200 | 0.000000 |
| N | -6.229200 | -1.432500 | 0.000000 |
| H | -5.551200 | 3.627300  | 0.000000 |
| N | 3.967800  | 0.853600  | 0.000000 |
| C | 5.290500  | 0.456500  | 0.000000 |
| N | 5.680900  | -0.820300 | 0.000000 |
| C | 4.642700  | -1.689400 | 0.000000 |
| C | 3.273700  | -1.390800 | 0.000000 |
| C | 2.863400  | -0.025400 | 0.000000 |
| N | 4.707000  | -3.065400 | 0.000000 |
| C | 3.408500  | -3.538500 | 0.000000 |
| N | 2.520000  | -2.561000 | 0.000000 |
| O | 1.693900  | 0.420200  | 0.000000 |
| N | 6.229200  | 1.432500  | 0.000000 |
| H | 5.551200  | -3.627300 | 0.000000 |
| N | -0.051200 | 5.239400  | 0.000000 |
| C | 0.404100  | 6.504800  | 0.000000 |
| N | 1.677600  | 6.946000  | 0.000000 |
| C | 2.550900  | 5.914600  | 0.000000 |
| C | 2.234000  | 4.546600  | 0.000000 |
| C | 0.851000  | 4.207900  | 0.000000 |
| N | 3.930100  | 5.967900  | 0.000000 |
| C | 4.386100  | 4.674600  | 0.000000 |
| N | 3.405900  | 3.780100  | 0.000000 |
| N | 0.386900  | 2.950000  | 0.000000 |
| H | 4.502200  | 6.804900  | 0.000000 |
| N | 0.051200  | -5.239400 | 0.000000 |
| C | -0.404100 | -6.504800 | 0.000000 |
| N | -1.677600 | -6.946000 | 0.000000 |
| C | -2.550900 | -5.914600 | 0.000000 |
| C | -2.234000 | -4.546600 | 0.000000 |
| C | -0.851000 | -4.207900 | 0.000000 |
| N | -3.930100 | -5.967900 | 0.000000 |
| C | -4.386100 | -4.674600 | 0.000000 |
| N | -3.405900 | -3.780100 | 0.000000 |



|   |           |           |          |
|---|-----------|-----------|----------|
| N | -0.386900 | -2.950000 | 0.000000 |
| H | -4.502200 | -6.804900 | 0.000000 |
| H | -0.633400 | 2.791500  | 0.000000 |
| H | 1.015500  | 2.140900  | 0.000000 |
| H | -1.015500 | -2.140900 | 0.000000 |
| H | 0.633400  | -2.791500 | 0.000000 |
| H | -7.207000 | -1.177000 | 0.000000 |
| H | -5.984300 | -2.409700 | 0.000000 |
| H | 5.984300  | 2.409700  | 0.000000 |
| H | 7.207000  | 1.177000  | 0.000000 |
| H | 5.444900  | 4.459600  | 0.000000 |
| H | -5.444900 | -4.459600 | 0.000000 |
| H | -3.175900 | 4.593700  | 0.000000 |
| H | 3.175900  | -4.593700 | 0.000000 |
| H | -0.362400 | 7.277400  | 0.000000 |
| H | 0.362400  | -7.277400 | 0.000000 |
| H | 3.740000  | 1.870300  | 0.000000 |
| H | -3.740000 | -1.870300 | 0.000000 |

**(H • D)<sub>2</sub> gas phase C<sub>2</sub>      E = -9457.9165**

|   |           |           |           |
|---|-----------|-----------|-----------|
| N | -0.330600 | -3.881900 | -0.201700 |
| C | -0.152900 | -5.178200 | 0.120900  |
| N | 0.990200  | -5.822600 | 0.397700  |
| C | 2.037900  | -4.996600 | 0.342900  |
| C | 2.016600  | -3.631300 | 0.042600  |
| C | 0.751100  | -3.045300 | -0.261700 |
| N | 3.374700  | -5.311900 | 0.591300  |
| C | 4.116500  | -4.192000 | 0.458200  |
| N | 3.332100  | -3.161600 | 0.127800  |
| N | 0.581500  | -1.770200 | -0.593600 |
| N | -3.061400 | -2.605100 | -0.361300 |
| C | -4.205700 | -3.361300 | -0.170800 |
| N | -5.397900 | -2.836600 | 0.075900  |
| C | -5.386300 | -1.492400 | 0.124200  |
| C | -4.302600 | -0.627600 | -0.084700 |
| C | -3.031500 | -1.199500 | -0.364800 |
| N | -6.459800 | -0.660900 | 0.370900  |
| C | -6.000400 | 0.636700  | 0.307300  |
| N | -4.705700 | 0.702400  | 0.035700  |
| O | -1.958400 | -0.593900 | -0.592600 |
| N | -4.059000 | -4.718000 | -0.209300 |
| N | 0.330600  | 3.881900  | -0.201700 |
| C | 0.152900  | 5.178200  | 0.120900  |
| N | -0.990200 | 5.822600  | 0.397700  |
| C | -2.037900 | 4.996600  | 0.342900  |
| C | -2.016600 | 3.631300  | 0.042600  |
| C | -0.751100 | 3.045300  | -0.261700 |
| N | -3.374700 | 5.311900  | 0.591300  |
| C | -4.116500 | 4.192000  | 0.458200  |

|   |           |           |           |
|---|-----------|-----------|-----------|
| N | -3.332100 | 3.161600  | 0.127800  |
| N | -0.581500 | 1.770200  | -0.593600 |
| N | 3.061400  | 2.605100  | -0.361300 |
| C | 4.205700  | 3.361300  | -0.170800 |
| N | 5.397900  | 2.836600  | 0.075900  |
| C | 5.386300  | 1.492400  | 0.124200  |
| C | 4.302600  | 0.627600  | -0.084700 |
| C | 3.031500  | 1.199500  | -0.364800 |
| N | 6.459800  | 0.660900  | 0.370900  |
| C | 6.000400  | -0.636700 | 0.307300  |
| N | 4.705700  | -0.702400 | 0.035700  |
| O | 1.958400  | 0.593900  | -0.592600 |
| N | 4.059000  | 4.718000  | -0.209300 |
| H | -1.056300 | -5.782200 | 0.170600  |
| H | 3.722200  | -6.235200 | 0.836900  |
| H | 5.184900  | -4.139300 | 0.601200  |
| H | 1.338900  | -1.079400 | -0.579800 |
| H | -0.375100 | -1.400700 | -0.689600 |
| H | -2.136300 | -3.080200 | -0.410100 |
| H | -7.411300 | -0.962900 | 0.555900  |
| H | -6.657800 | 1.479800  | 0.465900  |
| H | -3.308000 | -5.119900 | -0.756600 |
| H | -4.920400 | -5.252900 | -0.175700 |
| H | 1.056300  | 5.782200  | 0.170600  |
| H | -3.722200 | 6.235200  | 0.836900  |
| H | -5.184900 | 4.139300  | 0.601200  |
| H | -1.338900 | 1.079400  | -0.579800 |
| H | 0.375100  | 1.400700  | -0.689600 |
| H | 2.136300  | 3.080200  | -0.410100 |
| H | 7.411300  | 0.962900  | 0.555900  |
| H | 6.657800  | -1.479800 | 0.465900  |
| H | 3.308000  | 5.119900  | -0.756600 |
| H | 4.920400  | 5.252900  | -0.175700 |
| H | 3.731100  | -2.172700 | 0.021400  |
| H | -3.731100 | 2.172700  | 0.021400  |

**(H • D)<sub>2</sub> gas phase C<sub>2h</sub>      E = -9458.2365**

|   |           |           |          |
|---|-----------|-----------|----------|
| N | -0.288900 | -3.936000 | 0.000000 |
| C | -0.067600 | -5.265100 | 0.000000 |
| N | 1.100200  | -5.924200 | 0.000000 |
| C | 2.133800  | -5.078200 | 0.000000 |
| C | 2.073800  | -3.682300 | 0.000000 |
| C | 0.779700  | -3.078900 | 0.000000 |
| N | 3.491400  | -5.402200 | 0.000000 |
| C | 4.209800  | -4.259100 | 0.000000 |
| N | 3.389100  | -3.204300 | 0.000000 |
| N | 0.576900  | -1.767800 | 0.000000 |
| N | -3.083100 | -2.597900 | 0.000000 |
| C | -4.251900 | -3.344400 | 0.000000 |

|   |           |           |          |
|---|-----------|-----------|----------|
| N | -5.464700 | -2.803900 | 0.000000 |
| C | -5.449100 | -1.460800 | 0.000000 |
| C | -4.336400 | -0.606900 | 0.000000 |
| C | -3.043100 | -1.192000 | 0.000000 |
| N | -6.541200 | -0.616600 | 0.000000 |
| C | -6.064400 | 0.676800  | 0.000000 |
| N | -4.741200 | 0.728800  | 0.000000 |
| O | -1.941000 | -0.595100 | 0.000000 |
| N | -4.127200 | -4.693300 | 0.000000 |
| N | 0.288900  | 3.936000  | 0.000000 |
| C | 0.067600  | 5.265100  | 0.000000 |
| N | -1.100200 | 5.924200  | 0.000000 |
| C | -2.133800 | 5.078200  | 0.000000 |
| C | -2.073800 | 3.682300  | 0.000000 |
| C | -0.779700 | 3.078900  | 0.000000 |
| N | -3.491400 | 5.402200  | 0.000000 |
| C | -4.209800 | 4.259100  | 0.000000 |
| N | -3.389100 | 3.204300  | 0.000000 |
| N | -0.576900 | 1.767800  | 0.000000 |
| N | 3.083100  | 2.597900  | 0.000000 |
| C | 4.251900  | 3.344400  | 0.000000 |
| N | 5.464700  | 2.803900  | 0.000000 |
| C | 5.449100  | 1.460800  | 0.000000 |
| C | 4.336400  | 0.606900  | 0.000000 |
| C | 3.043100  | 1.192000  | 0.000000 |
| N | 6.541200  | 0.616600  | 0.000000 |
| C | 6.064400  | -0.676800 | 0.000000 |
| N | 4.741200  | -0.728800 | 0.000000 |
| O | 1.941000  | 0.595100  | 0.000000 |
| N | 4.127200  | 4.693300  | 0.000000 |
| H | -0.954300 | -5.896100 | 0.000000 |
| H | 3.868100  | -6.346500 | 0.000000 |
| H | 5.288000  | -4.208400 | 0.000000 |
| H | 1.334300  | -1.077200 | 0.000000 |
| H | -0.385800 | -1.399200 | 0.000000 |
| H | -2.162700 | -3.078200 | 0.000000 |
| H | -7.513700 | -0.908000 | 0.000000 |
| H | -6.731600 | 1.527100  | 0.000000 |
| H | -3.230600 | -5.154700 | 0.000000 |
| H | -4.969800 | -5.253600 | 0.000000 |
| H | 0.954300  | 5.896100  | 0.000000 |
| H | -3.868100 | 6.346500  | 0.000000 |
| H | -5.288000 | 4.208400  | 0.000000 |
| H | -1.334300 | 1.077200  | 0.000000 |
| H | 0.385800  | 1.399200  | 0.000000 |
| H | 2.162700  | 3.078200  | 0.000000 |
| H | 7.513700  | 0.908000  | 0.000000 |
| H | 6.731600  | -1.527100 | 0.000000 |
| H | 3.230600  | 5.154700  | 0.000000 |
| H | 4.969800  | 5.253600  | 0.000000 |

|   |           |           |          |
|---|-----------|-----------|----------|
| H | 3.771500  | -2.202500 | 0.000000 |
| H | -3.771500 | 2.202500  | 0.000000 |

**(H • D)<sub>2</sub> water C<sub>2</sub>      E = -9603.7313**

|   |           |           |           |
|---|-----------|-----------|-----------|
| N | -0.341200 | -3.872200 | -0.810300 |
| C | -0.165300 | -5.207200 | -0.817800 |
| N | 0.982500  | -5.899500 | -0.735900 |
| C | 2.042000  | -5.079900 | -0.607200 |
| C | 2.003700  | -3.684100 | -0.572400 |
| C | 0.744400  | -3.046500 | -0.712700 |
| N | 3.378400  | -5.428300 | -0.474100 |
| C | 4.109600  | -4.303600 | -0.351500 |
| N | 3.312100  | -3.235800 | -0.412400 |
| N | 0.567800  | -1.722700 | -0.747600 |
| N | -2.838000 | -2.547100 | -0.035600 |
| C | -3.698500 | -3.215400 | 0.811900  |
| N | -4.734000 | -2.631300 | 1.416300  |
| C | -4.832300 | -1.312400 | 1.140400  |
| C | -4.000900 | -0.543000 | 0.313100  |
| C | -2.915800 | -1.181300 | -0.340200 |
| N | -5.769000 | -0.427800 | 1.624700  |
| C | -5.480100 | 0.811100  | 1.100800  |
| N | -4.422300 | 0.785200  | 0.304200  |
| O | -2.068700 | -0.655800 | -1.112900 |
| N | -3.426700 | -4.523900 | 1.057800  |
| N | 0.341200  | 3.872200  | -0.810300 |
| C | 0.165300  | 5.207200  | -0.817800 |
| N | -0.982500 | 5.899500  | -0.735900 |
| C | -2.042000 | 5.079900  | -0.607200 |
| C | -2.003700 | 3.684100  | -0.572400 |
| C | -0.744400 | 3.046500  | -0.712700 |
| N | -3.378400 | 5.428300  | -0.474100 |
| C | -4.109600 | 4.303600  | -0.351500 |
| N | -3.312100 | 3.235800  | -0.412400 |
| N | -0.567800 | 1.722700  | -0.747600 |
| N | 2.838000  | 2.547100  | -0.035600 |
| C | 3.698500  | 3.215400  | 0.811900  |
| N | 4.734000  | 2.631300  | 1.416300  |
| C | 4.832300  | 1.312400  | 1.140400  |
| C | 4.000900  | 0.543000  | 0.313100  |
| C | 2.915800  | 1.181300  | -0.340200 |
| N | 5.769000  | 0.427800  | 1.624700  |
| C | 5.480100  | -0.811100 | 1.100800  |
| N | 4.422300  | -0.785200 | 0.304200  |
| O | 2.068700  | 0.655800  | -1.112900 |
| N | 3.426700  | 4.523900  | 1.057800  |
| H | -1.072400 | -5.799600 | -0.910500 |
| H | 3.752300  | -6.371700 | -0.461800 |
| H | 5.178200  | -4.275500 | -0.215400 |

|   |           |           |           |
|---|-----------|-----------|-----------|
| H | 1.346600  | -1.061000 | -0.798100 |
| H | -0.371900 | -1.352500 | -0.936200 |
| H | -2.014500 | -3.058700 | -0.421000 |
| H | -6.528100 | -0.646000 | 2.261000  |
| H | -6.069400 | 1.684500  | 1.337200  |
| H | -2.811700 | -5.038900 | 0.441700  |
| H | -4.138100 | -5.063600 | 1.536000  |
| H | 1.072400  | 5.799600  | -0.910500 |
| H | -3.752300 | 6.371700  | -0.461800 |
| H | -5.178200 | 4.275500  | -0.215400 |
| H | -1.346600 | 1.061000  | -0.798100 |
| H | 0.371900  | 1.352500  | -0.936200 |
| H | 2.014500  | 3.058700  | -0.421000 |
| H | 6.528100  | 0.646000  | 2.261000  |
| H | 6.069400  | -1.684500 | 1.337200  |
| H | 2.811700  | 5.038900  | 0.441700  |
| H | 4.138100  | 5.063600  | 1.536000  |
| H | 3.665100  | -2.244600 | -0.240900 |
| H | -3.665100 | 2.244600  | -0.240900 |

**(H • D)<sub>2</sub> water C<sub>2h</sub> E = -9602.0458**

|   |           |           |          |
|---|-----------|-----------|----------|
| N | -0.290300 | -3.967900 | 0.000000 |
| C | -0.084400 | -5.298500 | 0.000000 |
| N | 1.080900  | -5.970100 | 0.000000 |
| C | 2.134400  | -5.131000 | 0.000000 |
| C | 2.071800  | -3.738000 | 0.000000 |
| C | 0.790500  | -3.125900 | 0.000000 |
| N | 3.485400  | -5.452600 | 0.000000 |
| C | 4.203300  | -4.312900 | 0.000000 |
| N | 3.381900  | -3.260800 | 0.000000 |
| N | 0.602500  | -1.809900 | 0.000000 |
| N | -3.043000 | -2.611800 | 0.000000 |
| C | -4.206300 | -3.358600 | 0.000000 |
| N | -5.426700 | -2.815400 | 0.000000 |
| C | -5.409100 | -1.463400 | 0.000000 |
| C | -4.289300 | -0.620800 | 0.000000 |
| C | -3.001700 | -1.210800 | 0.000000 |
| N | -6.490800 | -0.611500 | 0.000000 |
| C | -6.004100 | 0.677900  | 0.000000 |
| N | -4.680500 | 0.718500  | 0.000000 |
| O | -1.897100 | -0.610600 | 0.000000 |
| N | -4.069600 | -4.702800 | 0.000000 |
| N | 0.290300  | 3.967900  | 0.000000 |
| C | 0.084400  | 5.298500  | 0.000000 |
| N | -1.080900 | 5.970100  | 0.000000 |
| C | -2.134400 | 5.131000  | 0.000000 |
| C | -2.071800 | 3.738000  | 0.000000 |
| C | -0.790500 | 3.125900  | 0.000000 |
| N | -3.485400 | 5.452600  | 0.000000 |

|   |           |           |          |
|---|-----------|-----------|----------|
| C | -4.203300 | 4.312900  | 0.000000 |
| N | -3.381900 | 3.260800  | 0.000000 |
| N | -0.602500 | 1.809900  | 0.000000 |
| N | 3.043000  | 2.611800  | 0.000000 |
| C | 4.206300  | 3.358600  | 0.000000 |
| N | 5.426700  | 2.815400  | 0.000000 |
| C | 5.409100  | 1.463400  | 0.000000 |
| C | 4.289300  | 0.620800  | 0.000000 |
| C | 3.001700  | 1.210800  | 0.000000 |
| N | 6.490800  | 0.611500  | 0.000000 |
| C | 6.004100  | -0.677900 | 0.000000 |
| N | 4.680500  | -0.718500 | 0.000000 |
| O | 1.897100  | 0.610600  | 0.000000 |
| N | 4.069600  | 4.702800  | 0.000000 |
| H | -0.979900 | -5.915300 | 0.000000 |
| H | 3.878600  | -6.388300 | 0.000000 |
| H | 5.279600  | -4.261600 | 0.000000 |
| H | 1.369600  | -1.133500 | 0.000000 |
| H | -0.353600 | -1.426700 | 0.000000 |
| H | -2.126000 | -3.099900 | 0.000000 |
| H | -7.468600 | -0.880900 | 0.000000 |
| H | -6.661500 | 1.534600  | 0.000000 |
| H | -3.164100 | -5.149300 | 0.000000 |
| H | -4.895900 | -5.285400 | 0.000000 |
| H | 0.979900  | 5.915300  | 0.000000 |
| H | -3.878600 | 6.388300  | 0.000000 |
| H | -5.279600 | 4.261600  | 0.000000 |
| H | -1.369600 | 1.133500  | 0.000000 |
| H | 0.353600  | 1.426700  | 0.000000 |
| H | 2.126000  | 3.099900  | 0.000000 |
| H | 7.468600  | 0.880900  | 0.000000 |
| H | 6.661500  | -1.534600 | 0.000000 |
| H | 3.164100  | 5.149300  | 0.000000 |
| H | 4.895900  | 5.285400  | 0.000000 |
| H | 3.739700  | -2.264600 | 0.000000 |
| H | -3.739700 | 2.264600  | 0.000000 |

**(H • II)<sub>2</sub> / (III)<sub>2</sub> gas phase C<sub>2</sub>      E = -9473.7350**

|   |           |           |           |
|---|-----------|-----------|-----------|
| N | -4.152800 | -0.352400 | -0.411600 |
| C | -5.519900 | -0.136000 | -0.419500 |
| N | -6.072600 | 1.059300  | -0.294300 |
| C | -5.170700 | 2.051700  | -0.168500 |
| C | -3.770800 | 1.955600  | -0.195600 |
| C | -3.191200 | 0.664900  | -0.331900 |
| N | -5.430700 | 3.397000  | -0.016300 |
| C | -4.216100 | 4.047800  | 0.041600  |
| N | -3.191800 | 3.217100  | -0.062100 |
| O | -1.969300 | 0.371800  | -0.375000 |
| N | -6.313600 | -1.250600 | -0.525900 |

|   |           |           |           |
|---|-----------|-----------|-----------|
| H | -6.352100 | 3.820600  | 0.033800  |
| H | -3.787300 | -1.323700 | -0.352400 |
| N | 4.152800  | 0.352400  | -0.411600 |
| C | 5.519900  | 0.136000  | -0.419500 |
| N | 6.072600  | -1.059300 | -0.294300 |
| C | 5.170700  | -2.051700 | -0.168500 |
| C | 3.770800  | -1.955600 | -0.195600 |
| C | 3.191200  | -0.664900 | -0.331900 |
| N | 5.430700  | -3.397000 | -0.016300 |
| C | 4.216100  | -4.047800 | 0.041600  |
| N | 3.191800  | -3.217100 | -0.062100 |
| O | 1.969300  | -0.371800 | -0.375000 |
| N | 6.313600  | 1.250600  | -0.525900 |
| H | 6.352100  | -3.820600 | 0.033800  |
| H | 3.787300  | 1.323700  | -0.352400 |
| N | -0.449700 | 4.007300  | 0.167700  |
| C | -0.250800 | 5.314400  | 0.544300  |
| N | 0.914700  | 5.875400  | 0.754000  |
| C | 1.946300  | 5.021000  | 0.552700  |
| C | 1.874800  | 3.678900  | 0.153200  |
| C | 0.584700  | 3.114900  | -0.040700 |
| N | 3.290000  | 5.276200  | 0.708400  |
| C | 3.961300  | 4.112600  | 0.407300  |
| N | 3.146500  | 3.125700  | 0.062100  |
| N | 0.337200  | 1.863600  | -0.381200 |
| H | 3.695600  | 6.160600  | 1.001000  |
| H | -1.450600 | 3.676100  | 0.058800  |
| N | 0.449700  | -4.007300 | 0.167700  |
| C | 0.250800  | -5.314400 | 0.544300  |
| N | -0.914700 | -5.875400 | 0.754000  |
| C | -1.946300 | -5.021000 | 0.552700  |
| C | -1.874800 | -3.678900 | 0.153200  |
| C | -0.584700 | -3.114900 | -0.040700 |
| N | -3.290000 | -5.276200 | 0.708400  |
| C | -3.961300 | -4.112600 | 0.407300  |
| N | -3.146500 | -3.125700 | 0.062100  |
| N | -0.337200 | -1.863600 | -0.381200 |
| H | -3.695600 | -6.160600 | 1.001000  |
| H | 1.450600  | -3.676100 | 0.058800  |
| H | -0.621300 | 1.473200  | -0.405100 |
| H | 1.105700  | 1.178200  | -0.431100 |
| H | -1.105700 | -1.178200 | -0.431100 |
| H | 0.621300  | -1.473200 | -0.405100 |
| H | -7.302800 | -1.047700 | -0.638400 |
| H | -5.973300 | -2.018300 | -1.094500 |
| H | 5.973300  | 2.018300  | -1.094500 |
| H | 7.302800  | 1.047700  | -0.638400 |
| H | 5.038900  | 4.040900  | 0.469900  |
| H | -5.038900 | -4.040900 | 0.469900  |
| H | -4.149300 | 5.120600  | 0.157800  |

|   |           |           |          |
|---|-----------|-----------|----------|
| H | 4.149300  | -5.120600 | 0.157800 |
| H | -1.156600 | 5.899100  | 0.674100 |
| H | 1.156600  | -5.899100 | 0.674100 |

**(H • II)<sub>2</sub> / (III)<sub>2</sub> gas phase C<sub>2h</sub>      E = -9472.9715**

|   |           |           |          |
|---|-----------|-----------|----------|
| N | -4.183300 | -0.319100 | 0.000000 |
| C | -5.550200 | -0.081800 | 0.000000 |
| N | -6.082400 | 1.132400  | 0.000000 |
| C | -5.166300 | 2.114800  | 0.000000 |
| C | -3.767600 | 1.994200  | 0.000000 |
| C | -3.206000 | 0.690100  | 0.000000 |
| N | -5.405800 | 3.472800  | 0.000000 |
| C | -4.181500 | 4.107800  | 0.000000 |
| N | -3.171100 | 3.254800  | 0.000000 |
| O | -1.987600 | 0.378200  | 0.000000 |
| N | -6.370400 | -1.161600 | 0.000000 |
| H | -6.320700 | 3.912700  | 0.000000 |
| H | -3.825700 | -1.291000 | 0.000000 |
| N | 4.183300  | 0.319100  | 0.000000 |
| C | 5.550200  | 0.081800  | 0.000000 |
| N | 6.082400  | -1.132400 | 0.000000 |
| C | 5.166300  | -2.114800 | 0.000000 |
| C | 3.767600  | -1.994200 | 0.000000 |
| C | 3.206000  | -0.690100 | 0.000000 |
| N | 5.405800  | -3.472800 | 0.000000 |
| C | 4.181500  | -4.107800 | 0.000000 |
| N | 3.171100  | -3.254800 | 0.000000 |
| O | 1.987600  | -0.378200 | 0.000000 |
| N | 6.370400  | 1.161600  | 0.000000 |
| H | 6.320700  | -3.912700 | 0.000000 |
| H | 3.825700  | 1.291000  | 0.000000 |
| N | -0.456200 | 4.047000  | 0.000000 |
| C | -0.283000 | 5.408700  | 0.000000 |
| N | 0.872200  | 6.027100  | 0.000000 |
| C | 1.917800  | 5.167000  | 0.000000 |
| C | 1.875200  | 3.764100  | 0.000000 |
| C | 0.592800  | 3.147400  | 0.000000 |
| N | 3.255700  | 5.485100  | 0.000000 |
| C | 3.951900  | 4.298700  | 0.000000 |
| N | 3.162500  | 3.234000  | 0.000000 |
| N | 0.357600  | 1.848600  | 0.000000 |
| H | 3.641500  | 6.425100  | 0.000000 |
| H | -1.457300 | 3.687900  | 0.000000 |
| N | 0.456200  | -4.047000 | 0.000000 |
| C | 0.283000  | -5.408700 | 0.000000 |
| N | -0.872200 | -6.027100 | 0.000000 |
| C | -1.917800 | -5.167000 | 0.000000 |
| C | -1.875200 | -3.764100 | 0.000000 |
| C | -0.592800 | -3.147400 | 0.000000 |



|   |           |           |          |
|---|-----------|-----------|----------|
| N | -3.255700 | -5.485100 | 0.000000 |
| C | -3.951900 | -4.298700 | 0.000000 |
| N | -3.162500 | -3.234000 | 0.000000 |
| N | -0.357600 | -1.848600 | 0.000000 |
| H | -3.641500 | -6.425100 | 0.000000 |
| H | 1.457300  | -3.687900 | 0.000000 |
| H | -0.599900 | 1.456100  | 0.000000 |
| H | 1.132900  | 1.168900  | 0.000000 |
| H | -1.132900 | -1.168900 | 0.000000 |
| H | 0.599900  | -1.456100 | 0.000000 |
| H | -7.370000 | -1.004200 | 0.000000 |
| H | -6.019500 | -2.105300 | 0.000000 |
| H | 6.019500  | 2.105300  | 0.000000 |
| H | 7.370000  | 1.004200  | 0.000000 |
| H | 5.033400  | 4.287600  | 0.000000 |
| H | -5.033400 | -4.287600 | 0.000000 |
| H | -4.098100 | 5.185600  | 0.000000 |
| H | 4.098100  | -5.185600 | 0.000000 |
| H | -1.200400 | 5.989600  | 0.000000 |
| H | 1.200400  | -5.989600 | 0.000000 |

**(H • II)<sub>2</sub> / (III)<sub>2</sub> water C<sub>2</sub> E = -9612.0755**

|   |           |           |           |
|---|-----------|-----------|-----------|
| N | -4.156600 | -0.363800 | -0.223200 |
| C | -5.464600 | -0.172200 | 0.172900  |
| N | -5.963200 | 1.014500  | 0.514000  |
| C | -5.056100 | 2.013800  | 0.436800  |
| C | -3.718600 | 1.926500  | 0.024600  |
| C | -3.205300 | 0.655300  | -0.343000 |
| N | -5.252500 | 3.343000  | 0.733300  |
| C | -4.064600 | 3.998300  | 0.502200  |
| N | -3.115300 | 3.181700  | 0.072700  |
| O | -2.039100 | 0.384800  | -0.739300 |
| N | -6.251600 | -1.285000 | 0.256400  |
| H | -6.113600 | 3.764100  | 1.064700  |
| H | -3.807300 | -1.334100 | -0.367300 |
| N | 4.156600  | 0.363800  | -0.223200 |
| C | 5.464600  | 0.172200  | 0.172900  |
| N | 5.963200  | -1.014500 | 0.514000  |
| C | 5.056100  | -2.013800 | 0.436800  |
| C | 3.718600  | -1.926500 | 0.024600  |
| C | 3.205300  | -0.655300 | -0.343000 |
| N | 5.252500  | -3.343000 | 0.733300  |
| C | 4.064600  | -3.998300 | 0.502200  |
| N | 3.115300  | -3.181700 | 0.072700  |
| O | 2.039100  | -0.384800 | -0.739300 |
| N | 6.251600  | 1.285000  | 0.256400  |
| H | 6.113600  | -3.764100 | 1.064700  |
| H | 3.807300  | 1.334100  | -0.367300 |
| N | -0.426200 | 4.006700  | -0.110100 |

|   |           |           |           |
|---|-----------|-----------|-----------|
| C | -0.238200 | 5.340900  | 0.110500  |
| N | 0.930600  | 5.943100  | 0.179100  |
| C | 1.968000  | 5.080800  | 0.012200  |
| C | 1.892100  | 3.698500  | -0.215100 |
| C | 0.604600  | 3.109800  | -0.288700 |
| N | 3.310100  | 5.367300  | 0.032000  |
| C | 3.981200  | 4.189100  | -0.173800 |
| N | 3.165600  | 3.153500  | -0.330800 |
| N | 0.349600  | 1.830700  | -0.507700 |
| H | 3.729500  | 6.279700  | 0.177900  |
| H | -1.424900 | 3.653200  | -0.100800 |
| N | 0.426200  | -4.006700 | -0.110100 |
| C | 0.238200  | -5.340900 | 0.110500  |
| N | -0.930600 | -5.943100 | 0.179100  |
| C | -1.968000 | -5.080800 | 0.012200  |
| C | -1.892100 | -3.698500 | -0.215100 |
| C | -0.604600 | -3.109800 | -0.288700 |
| N | -3.310100 | -5.367300 | 0.032000  |
| C | -3.981200 | -4.189100 | -0.173800 |
| N | -3.165600 | -3.153500 | -0.330800 |
| N | -0.349600 | -1.830700 | -0.507700 |
| H | -3.729500 | -6.279700 | 0.177900  |
| H | 1.424900  | -3.653200 | -0.100800 |
| H | -0.610900 | 1.459000  | -0.562400 |
| H | 1.119400  | 1.156400  | -0.611300 |
| H | -1.119400 | -1.156400 | -0.611300 |
| H | 0.610900  | -1.459000 | -0.562400 |
| H | -7.242200 | -1.108600 | 0.385800  |
| H | -6.042300 | -2.066600 | -0.352400 |
| H | 6.042300  | 2.066600  | -0.352400 |
| H | 7.242200  | 1.108600  | 0.385800  |
| H | 5.059900  | 4.152600  | -0.195800 |
| H | -5.059900 | -4.152600 | -0.195800 |
| H | -3.955500 | 5.060100  | 0.665300  |
| H | 3.955500  | -5.060100 | 0.665300  |
| H | -1.147700 | 5.917700  | 0.235100  |
| H | 1.147700  | -5.917700 | 0.235100  |

**(H • II)<sub>2</sub> / (III)<sub>2</sub> water C<sub>2h</sub> E = -9610.7910**

|   |           |           |          |
|---|-----------|-----------|----------|
| N | -4.176700 | -0.346600 | 0.000000 |
| C | -5.540600 | -0.119500 | 0.000000 |
| N | -6.080800 | 1.101900  | 0.000000 |
| C | -5.161400 | 2.091500  | 0.000000 |
| C | -3.764600 | 1.964800  | 0.000000 |
| C | -3.206900 | 0.661400  | 0.000000 |
| N | -5.394500 | 3.448000  | 0.000000 |
| C | -4.170100 | 4.079600  | 0.000000 |
| N | -3.161400 | 3.222900  | 0.000000 |
| O | -1.984500 | 0.355400  | 0.000000 |

|   |           |           |          |
|---|-----------|-----------|----------|
| N | -6.345600 | -1.204100 | 0.000000 |
| H | -6.301500 | 3.901900  | 0.000000 |
| H | -3.817000 | -1.321200 | 0.000000 |
| N | 4.176700  | 0.346600  | 0.000000 |
| C | 5.540600  | 0.119500  | 0.000000 |
| N | 6.080800  | -1.101900 | 0.000000 |
| C | 5.161400  | -2.091500 | 0.000000 |
| C | 3.764600  | -1.964800 | 0.000000 |
| C | 3.206900  | -0.661400 | 0.000000 |
| N | 5.394500  | -3.448000 | 0.000000 |
| C | 4.170100  | -4.079600 | 0.000000 |
| N | 3.161400  | -3.222900 | 0.000000 |
| O | 1.984500  | -0.355400 | 0.000000 |
| N | 6.345600  | 1.204100  | 0.000000 |
| H | 6.301500  | -3.901900 | 0.000000 |
| H | 3.817000  | 1.321200  | 0.000000 |
| N | -0.444100 | 4.073100  | 0.000000 |
| C | -0.256000 | 5.425800  | 0.000000 |
| N | 0.913600  | 6.030400  | 0.000000 |
| C | 1.952900  | 5.153100  | 0.000000 |
| C | 1.878100  | 3.752800  | 0.000000 |
| C | 0.589700  | 3.160600  | 0.000000 |
| N | 3.295300  | 5.439500  | 0.000000 |
| C | 3.966500  | 4.243100  | 0.000000 |
| N | 3.152200  | 3.194400  | 0.000000 |
| N | 0.339300  | 1.864200  | 0.000000 |
| H | 3.715000  | 6.363400  | 0.000000 |
| H | -1.440700 | 3.718800  | 0.000000 |
| N | 0.444100  | -4.073100 | 0.000000 |
| C | 0.256000  | -5.425800 | 0.000000 |
| N | -0.913600 | -6.030400 | 0.000000 |
| C | -1.952900 | -5.153100 | 0.000000 |
| C | -1.878100 | -3.752800 | 0.000000 |
| C | -0.589700 | -3.160600 | 0.000000 |
| N | -3.295300 | -5.439500 | 0.000000 |
| C | -3.966500 | -4.243100 | 0.000000 |
| N | -3.152200 | -3.194400 | 0.000000 |
| N | -0.339300 | -1.864200 | 0.000000 |
| H | -3.715000 | -6.363400 | 0.000000 |
| H | 1.440700  | -3.718800 | 0.000000 |
| H | -0.618600 | 1.480300  | 0.000000 |
| H | 1.111700  | 1.183900  | 0.000000 |
| H | -1.111700 | -1.183900 | 0.000000 |
| H | 0.618600  | -1.480300 | 0.000000 |
| H | -7.348500 | -1.076100 | 0.000000 |
| H | -5.980000 | -2.143800 | 0.000000 |
| H | 5.980000  | 2.143800  | 0.000000 |
| H | 7.348500  | 1.076100  | 0.000000 |
| H | 5.045800  | 4.207300  | 0.000000 |
| H | -5.045800 | -4.207300 | 0.000000 |

|   |           |           |          |
|---|-----------|-----------|----------|
| H | -4.082700 | 5.156000  | 0.000000 |
| H | 4.082700  | -5.156000 | 0.000000 |
| H | -1.165600 | 6.015700  | 0.000000 |
| H | 1.165600  | -6.015700 | 0.000000 |

**(III')<sub>2</sub> gas phase C<sub>2</sub>                    E = -9467.8392**

|   |           |           |           |
|---|-----------|-----------|-----------|
| N | -6.731400 | -1.927800 | -0.111300 |
| C | -8.107800 | -1.735600 | -0.122600 |
| N | -8.661100 | -0.533600 | -0.076600 |
| C | -7.763300 | 0.465300  | -0.017500 |
| C | -6.361000 | 0.385500  | -0.009400 |
| C | -5.749300 | -0.902900 | -0.053500 |
| N | -8.044400 | 1.814100  | 0.041700  |
| C | -6.842600 | 2.486000  | 0.081700  |
| N | -5.808000 | 1.663300  | 0.052600  |
| O | -4.539900 | -1.211000 | -0.044100 |
| N | -8.901600 | -2.835000 | -0.155300 |
| H | -6.350900 | -2.871300 | -0.121900 |
| N | 3.160900  | -2.565800 | 0.053500  |
| C | 3.029600  | -3.932800 | 0.076300  |
| N | 1.895400  | -4.591000 | 0.084800  |
| C | 0.821900  | -3.765100 | 0.067900  |
| C | 0.828000  | -2.363200 | 0.043900  |
| C | 2.084900  | -1.701400 | 0.035800  |
| N | -0.510200 | -4.115200 | 0.068900  |
| C | -1.238400 | -2.944700 | 0.045700  |
| N | -0.465500 | -1.869400 | 0.029800  |
| N | 2.263800  | -0.392200 | 0.013100  |
| N | -3.160900 | 2.565800  | 0.053500  |
| C | -3.029600 | 3.932800  | 0.076300  |
| N | -1.895400 | 4.591000  | 0.084800  |
| C | -0.821900 | 3.765100  | 0.067900  |
| C | -0.828000 | 2.363200  | 0.043900  |
| C | -2.084900 | 1.701400  | 0.035800  |
| N | 0.510200  | 4.115200  | 0.068900  |
| C | 1.238400  | 2.944700  | 0.045700  |
| N | 0.465500  | 1.869400  | 0.029800  |
| N | -2.263800 | 0.392200  | 0.013100  |
| N | 6.731400  | 1.927800  | -0.111300 |
| C | 8.107800  | 1.735600  | -0.122600 |
| N | 8.661100  | 0.533600  | -0.076600 |
| C | 7.763300  | -0.465300 | -0.017500 |
| C | 6.361000  | -0.385500 | -0.009400 |
| C | 5.749300  | 0.902900  | -0.053500 |
| N | 8.044400  | -1.814100 | 0.041700  |
| C | 6.842600  | -2.486000 | 0.081700  |
| N | 5.808000  | -1.663300 | 0.052600  |
| O | 4.539900  | 1.211000  | -0.044100 |
| N | 8.901600  | 2.835000  | -0.155300 |

|   |           |           |           |
|---|-----------|-----------|-----------|
| H | -8.973500 | 2.222900  | 0.053500  |
| H | -6.790800 | 3.564500  | 0.130500  |
| H | 6.790800  | -3.564500 | 0.130500  |
| H | 8.973500  | -2.222900 | 0.053500  |
| H | 3.965400  | -4.483600 | 0.087800  |
| H | -0.870600 | -5.064300 | 0.084700  |
| H | -2.321500 | -2.927200 | 0.040600  |
| H | 1.452500  | 0.247300  | 0.010400  |
| H | 3.199500  | 0.052900  | 0.000300  |
| H | -3.965400 | 4.483600  | 0.087800  |
| H | 0.870600  | 5.064300  | 0.084700  |
| H | 2.321500  | 2.927200  | 0.040600  |
| H | -1.452500 | -0.247300 | 0.010400  |
| H | -3.199500 | -0.052900 | 0.000300  |
| H | 6.350900  | 2.871300  | -0.121900 |
| H | -9.900100 | -2.682700 | -0.233200 |
| H | -8.547200 | -3.757900 | -0.364200 |
| H | 9.900100  | 2.682700  | -0.233200 |
| H | 8.547200  | 3.757900  | -0.364200 |
| H | 4.151000  | -2.170400 | 0.053000  |
| H | -4.151000 | 2.170400  | 0.053000  |

**(III')<sub>2</sub> gas phase C<sub>2h</sub>                    E = -9467.8750**

|   |           |           |          |
|---|-----------|-----------|----------|
| N | -6.731300 | -1.928300 | 0.000000 |
| C | -8.108000 | -1.736500 | 0.000000 |
| N | -8.661000 | -0.533000 | 0.000000 |
| C | -7.763000 | 0.466900  | 0.000000 |
| C | -6.360500 | 0.387400  | 0.000000 |
| C | -5.749000 | -0.901600 | 0.000000 |
| N | -8.043700 | 1.817200  | 0.000000 |
| C | -6.841500 | 2.490000  | 0.000000 |
| N | -5.807200 | 1.666600  | 0.000000 |
| O | -4.539400 | -1.209500 | 0.000000 |
| N | -8.902200 | -2.833400 | 0.000000 |
| H | -6.349600 | -2.871200 | 0.000000 |
| N | 3.159900  | -2.567400 | 0.000000 |
| C | 3.028100  | -3.934600 | 0.000000 |
| N | 1.893600  | -4.592400 | 0.000000 |
| C | 0.820500  | -3.765900 | 0.000000 |
| C | 0.827100  | -2.363800 | 0.000000 |
| C | 2.084300  | -1.702400 | 0.000000 |
| N | -0.511800 | -4.115500 | 0.000000 |
| C | -1.239500 | -2.944400 | 0.000000 |
| N | -0.466200 | -1.869400 | 0.000000 |
| N | 2.263500  | -0.393000 | 0.000000 |
| N | -3.159900 | 2.567400  | 0.000000 |
| C | -3.028100 | 3.934600  | 0.000000 |
| N | -1.893600 | 4.592400  | 0.000000 |
| C | -0.820500 | 3.765900  | 0.000000 |

|   |           |           |          |
|---|-----------|-----------|----------|
| C | -0.827100 | 2.363800  | 0.000000 |
| C | -2.084300 | 1.702400  | 0.000000 |
| N | 0.511800  | 4.115500  | 0.000000 |
| C | 1.239500  | 2.944400  | 0.000000 |
| N | 0.466200  | 1.869400  | 0.000000 |
| N | -2.263500 | 0.393000  | 0.000000 |
| N | 6.731300  | 1.928300  | 0.000000 |
| C | 8.108000  | 1.736500  | 0.000000 |
| N | 8.661000  | 0.533000  | 0.000000 |
| C | 7.763000  | -0.466900 | 0.000000 |
| C | 6.360500  | -0.387400 | 0.000000 |
| C | 5.749000  | 0.901600  | 0.000000 |
| N | 8.043700  | -1.817200 | 0.000000 |
| C | 6.841500  | -2.490000 | 0.000000 |
| N | 5.807200  | -1.666600 | 0.000000 |
| O | 4.539400  | 1.209500  | 0.000000 |
| N | 8.902200  | 2.833400  | 0.000000 |
| H | -8.972600 | 2.226300  | 0.000000 |
| H | -6.789500 | 3.569600  | 0.000000 |
| H | 6.789500  | -3.569600 | 0.000000 |
| H | 8.972600  | -2.226300 | 0.000000 |
| H | 3.963700  | -4.485700 | 0.000000 |
| H | -0.872400 | -5.064600 | 0.000000 |
| H | -2.322600 | -2.926400 | 0.000000 |
| H | 1.452300  | 0.246400  | 0.000000 |
| H | 3.199400  | 0.052200  | 0.000000 |
| H | -3.963700 | 4.485700  | 0.000000 |
| H | 0.872400  | 5.064600  | 0.000000 |
| H | 2.322600  | 2.926400  | 0.000000 |
| H | -1.452300 | -0.246400 | 0.000000 |
| H | -3.199400 | -0.052200 | 0.000000 |
| H | 6.349600  | 2.871200  | 0.000000 |
| H | -9.904700 | -2.691800 | 0.000000 |
| H | -8.547100 | -3.778400 | 0.000000 |
| H | 9.904700  | 2.691800  | 0.000000 |
| H | 8.547100  | 3.778400  | 0.000000 |
| H | 4.150400  | -2.172700 | 0.000000 |
| H | -4.150400 | 2.172700  | 0.000000 |

**(III')<sub>2</sub> water C<sub>2</sub>            E = -9605.3872**

|   |           |           |           |
|---|-----------|-----------|-----------|
| N | -6.696400 | -1.947700 | -0.068600 |
| C | -8.065500 | -1.754900 | -0.076200 |
| N | -8.623300 | -0.546100 | -0.045500 |
| C | -7.717300 | 0.456800  | -0.004000 |
| C | -6.317200 | 0.360400  | 0.003800  |
| C | -5.718400 | -0.931700 | -0.029700 |
| N | -7.983500 | 1.806400  | 0.032500  |
| C | -6.777500 | 2.466800  | 0.059500  |
| N | -5.750000 | 1.632900  | 0.043600  |

|   |           |           |           |
|---|-----------|-----------|-----------|
| O | -4.503200 | -1.238800 | -0.028000 |
| N | -8.848400 | -2.863800 | -0.073200 |
| H | -6.333900 | -2.898300 | -0.087900 |
| N | 3.121800  | -2.599500 | 0.038300  |
| C | 2.990700  | -3.959100 | 0.063100  |
| N | 1.848600  | -4.615800 | 0.067700  |
| C | 0.773100  | -3.783600 | 0.044400  |
| C | 0.794700  | -2.381900 | 0.017200  |
| C | 2.052800  | -1.731300 | 0.013600  |
| N | -0.559100 | -4.119700 | 0.043200  |
| C | -1.275800 | -2.948000 | 0.016300  |
| N | -0.494000 | -1.875300 | -0.000500 |
| N | 2.242500  | -0.422400 | -0.010600 |
| N | -3.121800 | 2.599500  | 0.038300  |
| C | -2.990700 | 3.959100  | 0.063100  |
| N | -1.848600 | 4.615800  | 0.067700  |
| C | -0.773100 | 3.783600  | 0.044400  |
| C | -0.794700 | 2.381900  | 0.017200  |
| C | -2.052800 | 1.731300  | 0.013600  |
| N | 0.559100  | 4.119700  | 0.043200  |
| C | 1.275800  | 2.948000  | 0.016300  |
| N | 0.494000  | 1.875300  | -0.000500 |
| N | -2.242500 | 0.422400  | -0.010600 |
| N | 6.696400  | 1.947700  | -0.068600 |
| C | 8.065500  | 1.754900  | -0.076200 |
| N | 8.623300  | 0.546100  | -0.045500 |
| C | 7.717300  | -0.456800 | -0.004000 |
| C | 6.317200  | -0.360400 | 0.003800  |
| C | 5.718400  | 0.931700  | -0.029700 |
| N | 7.983500  | -1.806400 | 0.032500  |
| C | 6.777500  | -2.466800 | 0.059500  |
| N | 5.750000  | -1.632900 | 0.043600  |
| O | 4.503200  | 1.238800  | -0.028000 |
| N | 8.848400  | 2.863800  | -0.073200 |
| H | -8.902000 | 2.236700  | 0.036400  |
| H | -6.714000 | 3.544200  | 0.088700  |
| H | 6.714000  | -3.544200 | 0.088700  |
| H | 8.902000  | -2.236700 | 0.036400  |
| H | 3.924600  | -4.509500 | 0.080500  |
| H | -0.943000 | -5.058800 | 0.060400  |
| H | -2.357000 | -2.928900 | 0.010300  |
| H | 1.440900  | 0.228300  | -0.016200 |
| H | 3.179500  | 0.011000  | -0.009400 |
| H | -3.924600 | 4.509500  | 0.080500  |
| H | 0.943000  | 5.058800  | 0.060400  |
| H | 2.357000  | 2.928900  | 0.010300  |
| H | -1.440900 | -0.228300 | -0.016200 |
| H | -3.179500 | -0.011000 | -0.009400 |
| H | 6.333900  | 2.898300  | -0.087900 |
| H | -9.836300 | -2.729300 | -0.254000 |

|   |           |           |           |
|---|-----------|-----------|-----------|
| H | -8.459200 | -3.761000 | -0.335900 |
| H | 9.836300  | 2.729300  | -0.254000 |
| H | 8.459200  | 3.761000  | -0.335900 |
| H | 4.104900  | -2.199300 | 0.040600  |
| H | -4.104900 | 2.199300  | 0.040600  |

**(III')<sub>2</sub> water C<sub>2h</sub> E = -9605.1932**

|   |           |           |          |
|---|-----------|-----------|----------|
| N | -6.694300 | -1.947500 | 0.000000 |
| C | -8.064900 | -1.756100 | 0.000000 |
| N | -8.623200 | -0.544900 | 0.000000 |
| C | -7.717100 | 0.457600  | 0.000000 |
| C | -6.316500 | 0.362300  | 0.000000 |
| C | -5.717600 | -0.929800 | 0.000000 |
| N | -7.983400 | 1.808000  | 0.000000 |
| C | -6.777300 | 2.469500  | 0.000000 |
| N | -5.749600 | 1.636000  | 0.000000 |
| O | -4.501900 | -1.236400 | 0.000000 |
| N | -8.844300 | -2.858200 | 0.000000 |
| H | -6.330300 | -2.897700 | 0.000000 |
| N | 3.120800  | -2.601800 | 0.000000 |
| C | 2.988900  | -3.961500 | 0.000000 |
| N | 1.846400  | -4.617500 | 0.000000 |
| C | 0.771400  | -3.784500 | 0.000000 |
| C | 0.793800  | -2.382500 | 0.000000 |
| C | 2.052200  | -1.732600 | 0.000000 |
| N | -0.561200 | -4.119500 | 0.000000 |
| C | -1.277100 | -2.947000 | 0.000000 |
| N | -0.494600 | -1.874700 | 0.000000 |
| N | 2.242500  | -0.423600 | 0.000000 |
| N | -3.120800 | 2.601800  | 0.000000 |
| C | -2.988900 | 3.961500  | 0.000000 |
| N | -1.846400 | 4.617500  | 0.000000 |
| C | -0.771400 | 3.784500  | 0.000000 |
| C | -0.793800 | 2.382500  | 0.000000 |
| C | -2.052200 | 1.732600  | 0.000000 |
| N | 0.561200  | 4.119500  | 0.000000 |
| C | 1.277100  | 2.947000  | 0.000000 |
| N | 0.494600  | 1.874700  | 0.000000 |
| N | -2.242500 | 0.423600  | 0.000000 |
| N | 6.694300  | 1.947500  | 0.000000 |
| C | 8.064900  | 1.756100  | 0.000000 |
| N | 8.623200  | 0.544900  | 0.000000 |
| C | 7.717100  | -0.457600 | 0.000000 |
| C | 6.316500  | -0.362300 | 0.000000 |
| C | 5.717600  | 0.929800  | 0.000000 |
| N | 7.983400  | -1.808000 | 0.000000 |
| C | 6.777300  | -2.469500 | 0.000000 |
| N | 5.749600  | -1.636000 | 0.000000 |
| O | 4.501900  | 1.236400  | 0.000000 |



|   |           |           |          |
|---|-----------|-----------|----------|
| N | 8.844300  | 2.858200  | 0.000000 |
| H | -8.901900 | 2.238200  | 0.000000 |
| H | -6.714300 | 3.547400  | 0.000000 |
| H | 6.714300  | -3.547400 | 0.000000 |
| H | 8.901900  | -2.238200 | 0.000000 |
| H | 3.922600  | -4.512700 | 0.000000 |
| H | -0.945700 | -5.058500 | 0.000000 |
| H | -2.358400 | -2.927000 | 0.000000 |
| H | 1.441000  | 0.227100  | 0.000000 |
| H | 3.179700  | 0.009800  | 0.000000 |
| H | -3.922600 | 4.512700  | 0.000000 |
| H | 0.945700  | 5.058500  | 0.000000 |
| H | 2.358400  | 2.927000  | 0.000000 |
| H | -1.441000 | -0.227100 | 0.000000 |
| H | -3.179700 | -0.009800 | 0.000000 |
| H | 6.330300  | 2.897700  | 0.000000 |
| H | -9.849700 | -2.748900 | 0.000000 |
| H | -8.457800 | -3.792000 | 0.000000 |
| H | 9.849700  | 2.748900  | 0.000000 |
| H | 8.457800  | 3.792000  | 0.000000 |
| H | 4.104200  | -2.202200 | 0.000000 |
| H | -4.104200 | 2.202200  | 0.000000 |

**(Li • I)<sub>2</sub> gas phase C<sub>2</sub>      E = -9475.9317**

|   |           |           |           |
|---|-----------|-----------|-----------|
| N | 0.642200  | -3.720800 | -0.209600 |
| C | 1.205400  | -4.899100 | -0.575800 |
| N | 2.473400  | -5.131300 | -0.916500 |
| C | 3.209100  | -4.011000 | -0.871000 |
| C | 2.769200  | -2.722800 | -0.528600 |
| C | 1.399000  | -2.591200 | -0.192300 |
| N | 4.553800  | -3.865300 | -1.166100 |
| C | 4.870300  | -2.545400 | -1.000700 |
| N | 3.827800  | -1.811000 | -0.618000 |
| N | 0.810400  | -1.422900 | 0.151200  |
| N | -2.088200 | -3.586600 | 0.518400  |
| C | -2.707600 | -4.785700 | 0.864300  |
| N | -4.023300 | -4.954500 | 0.953200  |
| C | -4.717400 | -3.838300 | 0.677900  |
| C | -4.186900 | -2.586600 | 0.367200  |
| C | -2.791000 | -2.415100 | 0.279500  |
| N | -6.084600 | -3.641100 | 0.653800  |
| C | -6.311100 | -2.314300 | 0.334600  |
| N | -5.185600 | -1.641300 | 0.153500  |
| O | -2.227500 | -1.303800 | -0.002600 |
| N | -1.880600 | -5.845900 | 1.084900  |
| N | -0.642200 | 3.720800  | -0.209600 |
| C | -1.205400 | 4.899100  | -0.575800 |
| N | -2.473400 | 5.131300  | -0.916500 |
| C | -3.209100 | 4.011000  | -0.871000 |

|    |           |           |           |
|----|-----------|-----------|-----------|
| C  | -2.769200 | 2.722800  | -0.528600 |
| C  | -1.399000 | 2.591200  | -0.192300 |
| N  | -4.553800 | 3.865300  | -1.166100 |
| C  | -4.870300 | 2.545400  | -1.000700 |
| N  | -3.827800 | 1.811000  | -0.618000 |
| N  | -0.810400 | 1.422900  | 0.151200  |
| N  | 2.088200  | 3.586600  | 0.518400  |
| C  | 2.707600  | 4.785700  | 0.864300  |
| N  | 4.023300  | 4.954500  | 0.953200  |
| C  | 4.717400  | 3.838300  | 0.677900  |
| C  | 4.186900  | 2.586600  | 0.367200  |
| C  | 2.791000  | 2.415100  | 0.279500  |
| N  | 6.084600  | 3.641100  | 0.653800  |
| C  | 6.311100  | 2.314300  | 0.334600  |
| N  | 5.185600  | 1.641300  | 0.153500  |
| O  | 2.227500  | 1.303800  | -0.002600 |
| N  | 1.880600  | 5.845900  | 1.084900  |
| H  | 0.532100  | -5.753300 | -0.600100 |
| H  | 5.179200  | -4.610100 | -1.458500 |
| H  | 5.869800  | -2.169600 | -1.170900 |
| H  | 1.323900  | -0.553200 | 0.082700  |
| H  | -0.208300 | -1.378100 | 0.172300  |
| H  | -1.051600 | -3.604300 | 0.291000  |
| H  | -6.792300 | -4.345700 | 0.839200  |
| H  | -7.309800 | -1.909100 | 0.251000  |
| H  | -0.924000 | -5.684300 | 1.374500  |
| H  | -2.323700 | -6.689900 | 1.431400  |
| H  | -0.532100 | 5.753300  | -0.600100 |
| H  | -5.179200 | 4.610100  | -1.458500 |
| H  | -5.869800 | 2.169600  | -1.170900 |
| H  | -1.323900 | 0.553200  | 0.082700  |
| H  | 0.208300  | 1.378100  | 0.172300  |
| H  | 1.051600  | 3.604300  | 0.291000  |
| H  | 6.792300  | 4.345700  | 0.839200  |
| H  | 7.309800  | 1.909100  | 0.251000  |
| H  | 0.924000  | 5.684300  | 1.374500  |
| H  | 2.323700  | 6.689900  | 1.431400  |
| Li | 3.880000  | 0.136400  | -0.272400 |
| Li | -3.880000 | -0.136400 | -0.272400 |

**(Li • I)<sub>2</sub> gas phase C<sub>2h</sub> E = -9474.4857**

|   |          |           |          |
|---|----------|-----------|----------|
| N | 0.700400 | -3.841500 | 0.000000 |
| C | 1.381100 | -5.013100 | 0.000000 |
| N | 2.697400 | -5.214800 | 0.000000 |
| C | 3.368300 | -4.053800 | 0.000000 |
| C | 2.817400 | -2.764600 | 0.000000 |
| C | 1.401800 | -2.674200 | 0.000000 |
| N | 4.739000 | -3.862300 | 0.000000 |
| C | 4.963700 | -2.513800 | 0.000000 |

|   |           |           |          |
|---|-----------|-----------|----------|
| N | 3.836100  | -1.806000 | 0.000000 |
| N | 0.729900  | -1.503200 | 0.000000 |
| N | -2.203500 | -3.767100 | 0.000000 |
| C | -2.895100 | -4.980100 | 0.000000 |
| N | -4.221900 | -5.089100 | 0.000000 |
| C | -4.849700 | -3.905400 | 0.000000 |
| C | -4.249100 | -2.647000 | 0.000000 |
| C | -2.844600 | -2.534200 | 0.000000 |
| N | -6.204600 | -3.635300 | 0.000000 |
| C | -6.357100 | -2.260600 | 0.000000 |
| N | -5.196200 | -1.625800 | 0.000000 |
| O | -2.222900 | -1.417400 | 0.000000 |
| N | -2.153700 | -6.110800 | 0.000000 |
| N | -0.700400 | 3.841500  | 0.000000 |
| C | -1.381100 | 5.013100  | 0.000000 |
| N | -2.697400 | 5.214800  | 0.000000 |
| C | -3.368300 | 4.053800  | 0.000000 |
| C | -2.817400 | 2.764600  | 0.000000 |
| C | -1.401800 | 2.674200  | 0.000000 |
| N | -4.739000 | 3.862300  | 0.000000 |
| C | -4.963700 | 2.513800  | 0.000000 |
| N | -3.836100 | 1.806000  | 0.000000 |
| N | -0.729900 | 1.503200  | 0.000000 |
| N | 2.203500  | 3.767100  | 0.000000 |
| C | 2.895100  | 4.980100  | 0.000000 |
| N | 4.221900  | 5.089100  | 0.000000 |
| C | 4.849700  | 3.905400  | 0.000000 |
| C | 4.249100  | 2.647000  | 0.000000 |
| C | 2.844600  | 2.534200  | 0.000000 |
| N | 6.204600  | 3.635300  | 0.000000 |
| C | 6.357100  | 2.260600  | 0.000000 |
| N | 5.196200  | 1.625800  | 0.000000 |
| O | 2.222900  | 1.417400  | 0.000000 |
| N | 2.153700  | 6.110800  | 0.000000 |
| H | 0.777000  | -5.918500 | 0.000000 |
| H | 5.439500  | -4.597600 | 0.000000 |
| H | 5.961500  | -2.097500 | 0.000000 |
| H | 1.230200  | -0.625600 | 0.000000 |
| H | -0.292300 | -1.494000 | 0.000000 |
| H | -1.149300 | -3.779000 | 0.000000 |
| H | -6.949800 | -4.325400 | 0.000000 |
| H | -7.332400 | -1.794300 | 0.000000 |
| H | -1.146300 | -6.100400 | 0.000000 |
| H | -2.638300 | -6.999300 | 0.000000 |
| H | -0.777000 | 5.918500  | 0.000000 |
| H | -5.439500 | 4.597600  | 0.000000 |
| H | -5.961500 | 2.097500  | 0.000000 |
| H | -1.230200 | 0.625600  | 0.000000 |
| H | 0.292300  | 1.494000  | 0.000000 |
| H | 1.149300  | 3.779000  | 0.000000 |

|    |           |           |          |
|----|-----------|-----------|----------|
| H  | 6.949800  | 4.325400  | 0.000000 |
| H  | 7.332400  | 1.794300  | 0.000000 |
| H  | 1.146300  | 6.100400  | 0.000000 |
| H  | 2.638300  | 6.999300  | 0.000000 |
| Li | 3.806600  | 0.159000  | 0.000000 |
| Li | -3.806600 | -0.159000 | 0.000000 |

**(Li • D)<sub>2</sub> water C<sub>2</sub> E = -9627.3257**

|   |           |           |           |
|---|-----------|-----------|-----------|
| N | 0.815800  | -3.246300 | -0.055300 |
| C | 1.501800  | -4.141500 | 0.689200  |
| N | 2.824600  | -4.214400 | 0.889600  |
| C | 3.481700  | -3.239700 | 0.224500  |
| C | 2.906200  | -2.257600 | -0.596700 |
| C | 1.498000  | -2.280000 | -0.734300 |
| N | 4.836800  | -2.989800 | 0.186700  |
| C | 5.030000  | -1.906200 | -0.629000 |
| N | 3.895300  | -1.431600 | -1.131100 |
| N | 0.816100  | -1.417400 | -1.515500 |
| N | -1.993500 | -2.778200 | 0.387200  |
| C | -2.560200 | -3.437900 | 1.464400  |
| N | -3.868900 | -3.470800 | 1.718100  |
| C | -4.599500 | -2.788200 | 0.807300  |
| C | -4.111500 | -2.075600 | -0.289900 |
| C | -2.721400 | -2.036200 | -0.540900 |
| N | -5.963500 | -2.616200 | 0.752600  |
| C | -6.239100 | -1.827400 | -0.348500 |
| N | -5.144500 | -1.478800 | -1.004700 |
| O | -2.171600 | -1.406900 | -1.496500 |
| N | -1.699600 | -4.123600 | 2.272100  |
| N | -0.815800 | 3.246300  | -0.055300 |
| C | -1.501800 | 4.141500  | 0.689200  |
| N | -2.824600 | 4.214400  | 0.889600  |
| C | -3.481700 | 3.239700  | 0.224500  |
| C | -2.906200 | 2.257600  | -0.596700 |
| C | -1.498000 | 2.280000  | -0.734300 |
| N | -4.836800 | 2.989800  | 0.186700  |
| C | -5.030000 | 1.906200  | -0.629000 |
| N | -3.895300 | 1.431600  | -1.131100 |
| N | -0.816100 | 1.417400  | -1.515500 |
| N | 1.993500  | 2.778200  | 0.387200  |
| C | 2.560200  | 3.437900  | 1.464400  |
| N | 3.868900  | 3.470800  | 1.718100  |
| C | 4.599500  | 2.788200  | 0.807300  |
| C | 4.111500  | 2.075600  | -0.289900 |
| C | 2.721400  | 2.036200  | -0.540900 |
| N | 5.963500  | 2.616200  | 0.752600  |
| C | 6.239100  | 1.827400  | -0.348500 |
| N | 5.144500  | 1.478800  | -1.004700 |
| O | 2.171600  | 1.406900  | -1.496500 |

|    |           |           |           |
|----|-----------|-----------|-----------|
| N  | 1.699600  | 4.123600  | 2.272100  |
| H  | 0.899300  | -4.897500 | 1.186200  |
| H  | 5.559500  | -3.506600 | 0.675500  |
| H  | 6.012600  | -1.500200 | -0.816300 |
| H  | 1.285000  | -0.576900 | -1.831100 |
| H  | -0.206600 | -1.444700 | -1.531100 |
| H  | -0.967800 | -2.916500 | 0.211400  |
| H  | -6.645400 | -2.996700 | 1.399800  |
| H  | -7.248800 | -1.545100 | -0.607200 |
| H  | -0.738800 | -3.807200 | 2.326500  |
| H  | -2.088800 | -4.457900 | 3.147000  |
| H  | -0.899300 | 4.897500  | 1.186200  |
| H  | -5.559500 | 3.506600  | 0.675500  |
| H  | -6.012600 | 1.500200  | -0.816300 |
| H  | -1.285000 | 0.576900  | -1.831100 |
| H  | 0.206600  | 1.444700  | -1.531100 |
| H  | 0.967800  | 2.916500  | 0.211400  |
| H  | 6.645400  | 2.996700  | 1.399800  |
| H  | 7.248800  | 1.545100  | -0.607200 |
| H  | 0.738800  | 3.807200  | 2.326500  |
| H  | 2.088800  | 4.457900  | 3.147000  |
| Li | 3.912000  | 0.289500  | -2.253700 |
| Li | -3.912000 | -0.289500 | -2.253700 |

**(Li • D)<sub>2</sub> water C<sub>2h</sub> E = -9621.4438**

|   |           |           |          |
|---|-----------|-----------|----------|
| N | 0.702800  | -3.883400 | 0.000000 |
| C | 1.376800  | -5.053000 | 0.000000 |
| N | 2.700200  | -5.258400 | 0.000000 |
| C | 3.378900  | -4.091200 | 0.000000 |
| C | 2.819400  | -2.805600 | 0.000000 |
| C | 1.405800  | -2.712900 | 0.000000 |
| N | 4.743400  | -3.891800 | 0.000000 |
| C | 4.959600  | -2.540600 | 0.000000 |
| N | 3.828100  | -1.842100 | 0.000000 |
| N | 0.736600  | -1.544700 | 0.000000 |
| N | -2.205400 | -3.807000 | 0.000000 |
| C | -2.896000 | -5.012100 | 0.000000 |
| N | -4.229600 | -5.112500 | 0.000000 |
| C | -4.849500 | -3.914200 | 0.000000 |
| C | -4.237200 | -2.661400 | 0.000000 |
| C | -2.829400 | -2.564000 | 0.000000 |
| N | -6.198700 | -3.637700 | 0.000000 |
| C | -6.343700 | -2.264000 | 0.000000 |
| N | -5.179000 | -1.635600 | 0.000000 |
| O | -2.182900 | -1.466900 | 0.000000 |
| N | -2.155100 | -6.141000 | 0.000000 |
| N | -0.702800 | 3.883400  | 0.000000 |
| C | -1.376800 | 5.053000  | 0.000000 |
| N | -2.700200 | 5.258400  | 0.000000 |

|    |           |           |          |
|----|-----------|-----------|----------|
| C  | -3.378900 | 4.091200  | 0.000000 |
| C  | -2.819400 | 2.805600  | 0.000000 |
| C  | -1.405800 | 2.712900  | 0.000000 |
| N  | -4.743400 | 3.891800  | 0.000000 |
| C  | -4.959600 | 2.540600  | 0.000000 |
| N  | -3.828100 | 1.842100  | 0.000000 |
| N  | -0.736600 | 1.544700  | 0.000000 |
| N  | 2.205400  | 3.807000  | 0.000000 |
| C  | 2.896000  | 5.012100  | 0.000000 |
| N  | 4.229600  | 5.112500  | 0.000000 |
| C  | 4.849500  | 3.914200  | 0.000000 |
| C  | 4.237200  | 2.661400  | 0.000000 |
| C  | 2.829400  | 2.564000  | 0.000000 |
| N  | 6.198700  | 3.637700  | 0.000000 |
| C  | 6.343700  | 2.264000  | 0.000000 |
| N  | 5.179000  | 1.635600  | 0.000000 |
| O  | 2.182900  | 1.466900  | 0.000000 |
| N  | 2.155100  | 6.141000  | 0.000000 |
| H  | 0.768200  | -5.953400 | 0.000000 |
| H  | 5.458200  | -4.611200 | 0.000000 |
| H  | 5.954500  | -2.120900 | 0.000000 |
| H  | 1.242700  | -0.669300 | 0.000000 |
| H  | -0.287800 | -1.531400 | 0.000000 |
| H  | -1.155700 | -3.826200 | 0.000000 |
| H  | -6.953400 | -4.315500 | 0.000000 |
| H  | -7.316100 | -1.794600 | 0.000000 |
| H  | -1.147400 | -6.124600 | 0.000000 |
| H  | -2.622700 | -7.037400 | 0.000000 |
| H  | -0.768200 | 5.953400  | 0.000000 |
| H  | -5.458200 | 4.611200  | 0.000000 |
| H  | -5.954500 | 2.120900  | 0.000000 |
| H  | -1.242700 | 0.669300  | 0.000000 |
| H  | 0.287800  | 1.531400  | 0.000000 |
| H  | 1.155700  | 3.826200  | 0.000000 |
| H  | 6.953400  | 4.315500  | 0.000000 |
| H  | 7.316100  | 1.794600  | 0.000000 |
| H  | 1.147400  | 6.124600  | 0.000000 |
| H  | 2.622700  | 7.037400  | 0.000000 |
| Li | 3.780500  | 0.141000  | 0.000000 |
| Li | -3.780500 | -0.141000 | 0.000000 |

**(Li • II)<sub>2</sub> gas phase C<sub>2</sub>      E = -9473.8889**

|   |           |           |           |
|---|-----------|-----------|-----------|
| N | -3.003100 | -3.133800 | -0.535800 |
| C | -3.987000 | -4.038500 | -0.929600 |
| N | -5.272100 | -3.737300 | -1.072300 |
| C | -5.547200 | -2.450400 | -0.795800 |
| C | -4.627800 | -1.466500 | -0.435800 |
| C | -3.263200 | -1.791300 | -0.295200 |
| N | -6.759900 | -1.789200 | -0.816300 |

|    |           |           |           |
|----|-----------|-----------|-----------|
| C  | -6.523900 | -0.470400 | -0.471200 |
| N  | -5.243200 | -0.235400 | -0.233300 |
| O  | -2.361300 | -0.952500 | 0.031300  |
| N  | -3.568800 | -5.322900 | -1.137100 |
| H  | -7.660500 | -2.199500 | -1.044800 |
| H  | -2.060300 | -3.519900 | -0.265500 |
| N  | 3.003100  | 3.133800  | -0.535800 |
| C  | 3.987000  | 4.038500  | -0.929600 |
| N  | 5.272100  | 3.737300  | -1.072300 |
| C  | 5.547200  | 2.450400  | -0.795800 |
| C  | 4.627800  | 1.466500  | -0.435800 |
| C  | 3.263200  | 1.791300  | -0.295200 |
| N  | 6.759900  | 1.789200  | -0.816300 |
| C  | 6.523900  | 0.470400  | -0.471200 |
| N  | 5.243200  | 0.235400  | -0.233300 |
| O  | 2.361300  | 0.952500  | 0.031300  |
| N  | 3.568800  | 5.322900  | -1.137100 |
| H  | 7.660500  | 2.199500  | -1.044800 |
| H  | 2.060300  | 3.519900  | -0.265500 |
| N  | -2.617400 | 2.489600  | 0.496600  |
| C  | -3.319100 | 3.572000  | 0.946900  |
| N  | -2.864700 | 4.790500  | 1.221100  |
| C  | -1.548300 | 4.899400  | 0.978100  |
| C  | -0.700900 | 3.895400  | 0.485200  |
| C  | -1.278500 | 2.624300  | 0.261300  |
| N  | -0.734200 | 6.004000  | 1.147400  |
| C  | 0.532200  | 5.640700  | 0.757000  |
| N  | 0.597100  | 4.381600  | 0.343000  |
| N  | -0.571300 | 1.560000  | -0.182700 |
| H  | -1.028700 | 6.909200  | 1.501000  |
| Li | -3.541300 | 0.739600  | 0.288800  |
| N  | 2.617400  | -2.489600 | 0.496600  |
| C  | 3.319100  | -3.572000 | 0.946900  |
| N  | 2.864700  | -4.790500 | 1.221100  |
| C  | 1.548300  | -4.899400 | 0.978100  |
| C  | 0.700900  | -3.895400 | 0.485200  |
| C  | 1.278500  | -2.624300 | 0.261300  |
| N  | 0.734200  | -6.004000 | 1.147400  |
| C  | -0.532200 | -5.640700 | 0.757000  |
| N  | -0.597100 | -4.381600 | 0.343000  |
| N  | 0.571300  | -1.560000 | -0.182700 |
| H  | 1.028700  | -6.909200 | 1.501000  |
| Li | 3.541300  | -0.739600 | 0.288800  |
| H  | -1.041900 | 0.663400  | -0.228200 |
| H  | 0.447200  | 1.553400  | -0.125900 |
| H  | -0.447200 | -1.553400 | -0.125900 |
| H  | 1.041900  | -0.663400 | -0.228200 |
| H  | -4.263300 | -5.943600 | -1.540200 |
| H  | -2.609600 | -5.482900 | -1.422900 |
| H  | 2.609600  | 5.482900  | -1.422900 |

|   |           |           |           |
|---|-----------|-----------|-----------|
| H | 4.263300  | 5.943600  | -1.540200 |
| H | 1.368900  | 6.325200  | 0.801200  |
| H | -1.368900 | -6.325200 | 0.801200  |
| H | -7.320600 | 0.258100  | -0.411900 |
| H | 7.320600  | -0.258100 | -0.411900 |
| H | -4.382100 | 3.407400  | 1.107800  |
| H | 4.382100  | -3.407400 | 1.107800  |

**(Li • II)<sub>2</sub> gas phase C<sub>2h</sub> E = -9470.7599**

|    |           |           |          |
|----|-----------|-----------|----------|
| N  | -3.182900 | -3.238600 | 0.000000 |
| C  | -4.252300 | -4.138500 | 0.000000 |
| N  | -5.533100 | -3.784500 | 0.000000 |
| C  | -5.716200 | -2.455500 | 0.000000 |
| C  | -4.718600 | -1.482000 | 0.000000 |
| C  | -3.359500 | -1.857100 | 0.000000 |
| N  | -6.894900 | -1.735700 | 0.000000 |
| C  | -6.564800 | -0.392300 | 0.000000 |
| N  | -5.256300 | -0.197600 | 0.000000 |
| O  | -2.393700 | -1.026800 | 0.000000 |
| N  | -3.940000 | -5.455200 | 0.000000 |
| H  | -7.832700 | -2.125900 | 0.000000 |
| H  | -2.212100 | -3.622600 | 0.000000 |
| N  | 3.182900  | 3.238600  | 0.000000 |
| C  | 4.252300  | 4.138500  | 0.000000 |
| N  | 5.533100  | 3.784500  | 0.000000 |
| C  | 5.716200  | 2.455500  | 0.000000 |
| C  | 4.718600  | 1.482000  | 0.000000 |
| C  | 3.359500  | 1.857100  | 0.000000 |
| N  | 6.894900  | 1.735700  | 0.000000 |
| C  | 6.564800  | 0.392300  | 0.000000 |
| N  | 5.256300  | 0.197600  | 0.000000 |
| O  | 2.393700  | 1.026800  | 0.000000 |
| N  | 3.940000  | 5.455200  | 0.000000 |
| H  | 7.832700  | 2.125900  | 0.000000 |
| H  | 2.212100  | 3.622600  | 0.000000 |
| N  | -2.619400 | 2.521700  | 0.000000 |
| C  | -3.432300 | 3.616600  | 0.000000 |
| N  | -3.080100 | 4.897000  | 0.000000 |
| C  | -1.745500 | 5.045300  | 0.000000 |
| C  | -0.775700 | 4.027100  | 0.000000 |
| C  | -1.263900 | 2.697400  | 0.000000 |
| N  | -1.029100 | 6.224500  | 0.000000 |
| C  | 0.301500  | 5.887600  | 0.000000 |
| N  | 0.509300  | 4.577500  | 0.000000 |
| N  | -0.475100 | 1.603500  | 0.000000 |
| H  | -1.425900 | 7.159200  | 0.000000 |
| Li | -3.476100 | 0.741900  | 0.000000 |
| N  | 2.619400  | -2.521700 | 0.000000 |
| C  | 3.432300  | -3.616600 | 0.000000 |



|    |           |           |          |
|----|-----------|-----------|----------|
| N  | 3.080100  | -4.897000 | 0.000000 |
| C  | 1.745500  | -5.045300 | 0.000000 |
| C  | 0.775700  | -4.027100 | 0.000000 |
| C  | 1.263900  | -2.697400 | 0.000000 |
| N  | 1.029100  | -6.224500 | 0.000000 |
| C  | -0.301500 | -5.887600 | 0.000000 |
| N  | -0.509300 | -4.577500 | 0.000000 |
| N  | 0.475100  | -1.603500 | 0.000000 |
| H  | 1.425900  | -7.159200 | 0.000000 |
| Li | 3.476100  | -0.741900 | 0.000000 |
| H  | -0.917300 | 0.694000  | 0.000000 |
| H  | 0.544000  | 1.646600  | 0.000000 |
| H  | -0.544000 | -1.646600 | 0.000000 |
| H  | 0.917300  | -0.694000 | 0.000000 |
| H  | -4.696200 | -6.127500 | 0.000000 |
| H  | -2.986700 | -5.777000 | 0.000000 |
| H  | 2.986700  | 5.777000  | 0.000000 |
| H  | 4.696200  | 6.127500  | 0.000000 |
| H  | 1.063800  | 6.655500  | 0.000000 |
| H  | -1.063800 | -6.655500 | 0.000000 |
| H  | -7.318300 | 0.383000  | 0.000000 |
| H  | 7.318300  | -0.383000 | 0.000000 |
| H  | -4.499900 | 3.408200  | 0.000000 |
| H  | 4.499900  | -3.408200 | 0.000000 |

**(Li • II)<sub>2</sub> water C<sub>2</sub> E = -9627.9319**

|   |           |           |           |
|---|-----------|-----------|-----------|
| N | -2.290000 | -2.697200 | -0.633200 |
| C | -2.929300 | -3.158700 | -1.764700 |
| N | -4.009000 | -2.579800 | -2.292600 |
| C | -4.429800 | -1.509100 | -1.582300 |
| C | -3.851000 | -0.971400 | -0.425400 |
| C | -2.675200 | -1.569600 | 0.096500  |
| N | -5.517200 | -0.704500 | -1.839100 |
| C | -5.567600 | 0.254900  | -0.853100 |
| N | -4.580000 | 0.128800  | 0.020800  |
| O | -1.996800 | -1.187700 | 1.091800  |
| N | -2.427800 | -4.295900 | -2.324300 |
| H | -6.167800 | -0.800700 | -2.611200 |
| H | -1.499900 | -3.266000 | -0.239700 |
| N | 2.290000  | 2.697200  | -0.633200 |
| C | 2.929300  | 3.158700  | -1.764700 |
| N | 4.009000  | 2.579800  | -2.292600 |
| C | 4.429800  | 1.509100  | -1.582300 |
| C | 3.851000  | 0.971400  | -0.425400 |
| C | 2.675200  | 1.569600  | 0.096500  |
| N | 5.517200  | 0.704500  | -1.839100 |
| C | 5.567600  | -0.254900 | -0.853100 |
| N | 4.580000  | -0.128800 | 0.020800  |
| O | 1.996800  | 1.187700  | 1.091800  |

|    |           |           |           |
|----|-----------|-----------|-----------|
| N  | 2.427800  | 4.295900  | -2.324300 |
| H  | 6.167800  | 0.800700  | -2.611200 |
| H  | 1.499900  | 3.266000  | -0.239700 |
| N  | -2.954900 | 2.670500  | 1.452000  |
| C  | -3.635400 | 3.840300  | 1.532600  |
| N  | -3.186700 | 5.083200  | 1.317300  |
| C  | -1.883500 | 5.084600  | 0.958700  |
| C  | -1.060500 | 3.957700  | 0.822600  |
| C  | -1.631200 | 2.691800  | 1.105100  |
| N  | -1.083700 | 6.158400  | 0.626700  |
| C  | 0.152000  | 5.661500  | 0.299500  |
| N  | 0.210900  | 4.339300  | 0.401800  |
| N  | -0.940400 | 1.540600  | 1.034000  |
| H  | -1.356700 | 7.135200  | 0.618500  |
| Li | -4.097800 | 1.024600  | 1.742000  |
| N  | 2.954900  | -2.670500 | 1.452000  |
| C  | 3.635400  | -3.840300 | 1.532600  |
| N  | 3.186700  | -5.083200 | 1.317300  |
| C  | 1.883500  | -5.084600 | 0.958700  |
| C  | 1.060500  | -3.957700 | 0.822600  |
| C  | 1.631200  | -2.691800 | 1.105100  |
| N  | 1.083700  | -6.158400 | 0.626700  |
| C  | -0.152000 | -5.661500 | 0.299500  |
| N  | -0.210900 | -4.339300 | 0.401800  |
| N  | 0.940400  | -1.540600 | 1.034000  |
| H  | 1.356700  | -7.135200 | 0.618500  |
| Li | 4.097800  | -1.024600 | 1.742000  |
| H  | -1.402400 | 0.642400  | 1.190200  |
| H  | 0.079300  | 1.545600  | 0.959400  |
| H  | -0.079300 | -1.545600 | 0.959400  |
| H  | 1.402400  | -0.642400 | 1.190200  |
| H  | -2.770300 | -4.533100 | -3.248300 |
| H  | -1.466200 | -4.552500 | -2.132300 |
| H  | 1.466200  | 4.552500  | -2.132300 |
| H  | 2.770300  | 4.533100  | -3.248300 |
| H  | 0.966700  | 6.301700  | -0.006100 |
| H  | -0.966700 | -6.301700 | -0.006100 |
| H  | -6.339900 | 1.008900  | -0.827600 |
| H  | 6.339900  | -1.008900 | -0.827600 |
| H  | -4.682100 | 3.751400  | 1.813000  |
| H  | 4.682100  | -3.751400 | 1.813000  |

**(Li • II)<sub>2</sub> water C<sub>2h</sub> E = -9619.2081**

|   |           |           |          |
|---|-----------|-----------|----------|
| N | -3.191700 | -3.261800 | 0.000000 |
| C | -4.247800 | -4.166300 | 0.000000 |
| N | -5.537000 | -3.814400 | 0.000000 |
| C | -5.720600 | -2.477300 | 0.000000 |
| C | -4.724000 | -1.502500 | 0.000000 |
| C | -3.363400 | -1.880400 | 0.000000 |

|    |           |           |          |
|----|-----------|-----------|----------|
| N  | -6.899800 | -1.765600 | 0.000000 |
| C  | -6.576800 | -0.422900 | 0.000000 |
| N  | -5.268900 | -0.220800 | 0.000000 |
| O  | -2.389000 | -1.064500 | 0.000000 |
| N  | -3.924400 | -5.476800 | 0.000000 |
| H  | -7.838000 | -2.151300 | 0.000000 |
| H  | -2.220400 | -3.641800 | 0.000000 |
| N  | 3.191700  | 3.261800  | 0.000000 |
| C  | 4.247800  | 4.166300  | 0.000000 |
| N  | 5.537000  | 3.814400  | 0.000000 |
| C  | 5.720600  | 2.477300  | 0.000000 |
| C  | 4.724000  | 1.502500  | 0.000000 |
| C  | 3.363400  | 1.880400  | 0.000000 |
| N  | 6.899800  | 1.765600  | 0.000000 |
| C  | 6.576800  | 0.422900  | 0.000000 |
| N  | 5.268900  | 0.220800  | 0.000000 |
| O  | 2.389000  | 1.064500  | 0.000000 |
| N  | 3.924400  | 5.476800  | 0.000000 |
| H  | 7.838000  | 2.151300  | 0.000000 |
| H  | 2.220400  | 3.641800  | 0.000000 |
| N  | -2.613000 | 2.550000  | 0.000000 |
| C  | -3.415600 | 3.640300  | 0.000000 |
| N  | -3.057300 | 4.929200  | 0.000000 |
| C  | -1.714000 | 5.071700  | 0.000000 |
| C  | -0.759400 | 4.040300  | 0.000000 |
| C  | -1.255400 | 2.714400  | 0.000000 |
| N  | -0.983300 | 6.238600  | 0.000000 |
| C  | 0.341400  | 5.888200  | 0.000000 |
| N  | 0.531000  | 4.574100  | 0.000000 |
| N  | -0.476800 | 1.617500  | 0.000000 |
| H  | -1.353400 | 7.182900  | 0.000000 |
| Li | -3.471700 | 0.740400  | 0.000000 |
| N  | 2.613000  | -2.550000 | 0.000000 |
| C  | 3.415600  | -3.640300 | 0.000000 |
| N  | 3.057300  | -4.929200 | 0.000000 |
| C  | 1.714000  | -5.071700 | 0.000000 |
| C  | 0.759400  | -4.040300 | 0.000000 |
| C  | 1.255400  | -2.714400 | 0.000000 |
| N  | 0.983300  | -6.238600 | 0.000000 |
| C  | -0.341400 | -5.888200 | 0.000000 |
| N  | -0.531000 | -4.574100 | 0.000000 |
| N  | 0.476800  | -1.617500 | 0.000000 |
| H  | 1.353400  | -7.182900 | 0.000000 |
| Li | 3.471700  | -0.740400 | 0.000000 |
| H  | -0.926200 | 0.710600  | 0.000000 |
| H  | 0.544100  | 1.656900  | 0.000000 |
| H  | -0.544100 | -1.656900 | 0.000000 |
| H  | 0.926200  | -0.710600 | 0.000000 |
| H  | -4.661100 | -6.169100 | 0.000000 |
| H  | -2.967300 | -5.788500 | 0.000000 |

|   |           |           |          |
|---|-----------|-----------|----------|
| H | 2.967300  | 5.788500  | 0.000000 |
| H | 4.661100  | 6.169100  | 0.000000 |
| H | 1.112000  | 6.645400  | 0.000000 |
| H | -1.112000 | -6.645400 | 0.000000 |
| H | -7.334900 | 0.345900  | 0.000000 |
| H | 7.334900  | -0.345900 | 0.000000 |
| H | -4.483000 | 3.435400  | 0.000000 |
| H | 4.483000  | -3.435400 | 0.000000 |

**(Na • D)<sub>2</sub> gas phase C<sub>2</sub>      E = -9432.1761**

|   |           |           |           |
|---|-----------|-----------|-----------|
| N | 0.535500  | -3.749800 | -0.624700 |
| C | 0.936600  | -4.941400 | -1.130200 |
| N | 2.112400  | -5.239200 | -1.684300 |
| C | 2.937500  | -4.182400 | -1.680700 |
| C | 2.668700  | -2.892400 | -1.187600 |
| C | 1.367900  | -2.676700 | -0.667500 |
| N | 4.232700  | -4.121200 | -2.161000 |
| C | 4.691300  | -2.849400 | -1.940000 |
| N | 3.788200  | -2.069800 | -1.353500 |
| N | 0.899900  | -1.491600 | -0.198300 |
| N | -1.924100 | -3.575300 | 0.725200  |
| C | -2.367000 | -4.731700 | 1.348700  |
| N | -3.601200 | -4.905100 | 1.805300  |
| C | -4.393400 | -3.842700 | 1.582400  |
| C | -4.041700 | -2.624800 | 0.985700  |
| C | -2.709200 | -2.439500 | 0.528600  |
| N | -5.728900 | -3.702200 | 1.898500  |
| C | -6.125700 | -2.445800 | 1.482700  |
| N | -5.138200 | -1.764500 | 0.927700  |
| O | -2.231500 | -1.395200 | -0.015500 |
| N | -1.465200 | -5.750900 | 1.447200  |
| N | -0.535500 | 3.749800  | -0.624700 |
| C | -0.936600 | 4.941400  | -1.130200 |
| N | -2.112400 | 5.239200  | -1.684300 |
| C | -2.937500 | 4.182400  | -1.680700 |
| C | -2.668700 | 2.892400  | -1.187600 |
| C | -1.367900 | 2.676700  | -0.667500 |
| N | -4.232700 | 4.121200  | -2.161000 |
| C | -4.691300 | 2.849400  | -1.940000 |
| N | -3.788200 | 2.069800  | -1.353500 |
| N | -0.899900 | 1.491600  | -0.198300 |
| N | 1.924100  | 3.575300  | 0.725200  |
| C | 2.367000  | 4.731700  | 1.348700  |
| N | 3.601200  | 4.905100  | 1.805300  |
| C | 4.393400  | 3.842700  | 1.582400  |
| C | 4.041700  | 2.624800  | 0.985700  |
| C | 2.709200  | 2.439500  | 0.528600  |
| N | 5.728900  | 3.702200  | 1.898500  |
| C | 6.125700  | 2.445800  | 1.482700  |

|    |           |           |           |
|----|-----------|-----------|-----------|
| N  | 5.138200  | 1.764500  | 0.927700  |
| O  | 2.231500  | 1.395200  | -0.015500 |
| N  | 1.465200  | 5.750900  | 1.447200  |
| H  | 0.203100  | -5.743000 | -1.076500 |
| H  | 4.737500  | -4.886400 | -2.597400 |
| H  | 5.690100  | -2.546600 | -2.224400 |
| H  | 1.424200  | -0.634200 | -0.322300 |
| H  | -0.106600 | -1.406300 | -0.049900 |
| H  | -0.984800 | -3.597400 | 0.239200  |
| H  | -6.307400 | -4.403000 | 2.351000  |
| H  | -7.139700 | -2.093900 | 1.611900  |
| H  | -0.473500 | -5.548600 | 1.426000  |
| H  | -1.756600 | -6.551000 | 1.997500  |
| H  | -0.203100 | 5.743000  | -1.076500 |
| H  | -4.737500 | 4.886400  | -2.597400 |
| H  | -5.690100 | 2.546600  | -2.224400 |
| H  | -1.424200 | 0.634200  | -0.322300 |
| H  | 0.106600  | 1.406300  | -0.049900 |
| H  | 0.984800  | 3.597400  | 0.239200  |
| H  | 6.307400  | 4.403000  | 2.351000  |
| H  | 7.139700  | 2.093900  | 1.611900  |
| H  | 0.473500  | 5.548600  | 1.426000  |
| H  | 1.756600  | 6.551000  | 1.997500  |
| Na | 4.204600  | 0.029300  | -0.360300 |
| Na | -4.204600 | -0.029300 | -0.360300 |

**(Na • D)<sub>2</sub> gas phase C<sub>2h</sub> E = -9428.4475**

|   |           |           |          |
|---|-----------|-----------|----------|
| N | 0.608800  | -4.223700 | 0.000000 |
| C | 1.278600  | -5.399700 | 0.000000 |
| N | 2.593300  | -5.611900 | 0.000000 |
| C | 3.271300  | -4.455600 | 0.000000 |
| C | 2.732700  | -3.158600 | 0.000000 |
| C | 1.315800  | -3.060200 | 0.000000 |
| N | 4.642500  | -4.280300 | 0.000000 |
| C | 4.879700  | -2.932100 | 0.000000 |
| N | 3.762000  | -2.210400 | 0.000000 |
| N | 0.636400  | -1.890100 | 0.000000 |
| N | -2.304800 | -4.188800 | 0.000000 |
| C | -2.989500 | -5.399000 | 0.000000 |
| N | -4.314300 | -5.504500 | 0.000000 |
| C | -4.936900 | -4.317000 | 0.000000 |
| C | -4.348000 | -3.047000 | 0.000000 |
| C | -2.933300 | -2.941000 | 0.000000 |
| N | -6.294600 | -4.071800 | 0.000000 |
| C | -6.469300 | -2.700800 | 0.000000 |
| N | -5.321400 | -2.046400 | 0.000000 |
| O | -2.265200 | -1.859400 | 0.000000 |
| N | -2.248800 | -6.532800 | 0.000000 |
| N | -0.608800 | 4.223700  | 0.000000 |

|    |           |           |          |
|----|-----------|-----------|----------|
| C  | -1.278600 | 5.399700  | 0.000000 |
| N  | -2.593300 | 5.611900  | 0.000000 |
| C  | -3.271300 | 4.455600  | 0.000000 |
| C  | -2.732700 | 3.158600  | 0.000000 |
| C  | -1.315800 | 3.060200  | 0.000000 |
| N  | -4.642500 | 4.280300  | 0.000000 |
| C  | -4.879700 | 2.932100  | 0.000000 |
| N  | -3.762000 | 2.210400  | 0.000000 |
| N  | -0.636400 | 1.890100  | 0.000000 |
| N  | 2.304800  | 4.188800  | 0.000000 |
| C  | 2.989500  | 5.399000  | 0.000000 |
| N  | 4.314300  | 5.504500  | 0.000000 |
| C  | 4.936900  | 4.317000  | 0.000000 |
| C  | 4.348000  | 3.047000  | 0.000000 |
| C  | 2.933300  | 2.941000  | 0.000000 |
| N  | 6.294600  | 4.071800  | 0.000000 |
| C  | 6.469300  | 2.700800  | 0.000000 |
| N  | 5.321400  | 2.046400  | 0.000000 |
| O  | 2.265200  | 1.859400  | 0.000000 |
| N  | 2.248800  | 6.532800  | 0.000000 |
| H  | 0.667000  | -6.299800 | 0.000000 |
| H  | 5.333800  | -5.023800 | 0.000000 |
| H  | 5.885300  | -2.532900 | 0.000000 |
| H  | 1.132700  | -1.012200 | 0.000000 |
| H  | -0.391200 | -1.882500 | 0.000000 |
| H  | -1.254500 | -4.192200 | 0.000000 |
| H  | -7.024100 | -4.777800 | 0.000000 |
| H  | -7.452100 | -2.250600 | 0.000000 |
| H  | -1.241700 | -6.524200 | 0.000000 |
| H  | -2.735000 | -7.420000 | 0.000000 |
| H  | -0.667000 | 6.299800  | 0.000000 |
| H  | -5.333800 | 5.023800  | 0.000000 |
| H  | -5.885300 | 2.532900  | 0.000000 |
| H  | -1.132700 | 1.012200  | 0.000000 |
| H  | 0.391200  | 1.882500  | 0.000000 |
| H  | 1.254500  | 4.192200  | 0.000000 |
| H  | 7.024100  | 4.777800  | 0.000000 |
| H  | 7.452100  | 2.250600  | 0.000000 |
| H  | 1.241700  | 6.524200  | 0.000000 |
| H  | 2.735000  | 7.420000  | 0.000000 |
| Na | 3.913800  | 0.150600  | 0.000000 |
| Na | -3.913800 | -0.150600 | 0.000000 |

**(Na • D)<sub>2</sub> water C<sub>2</sub> E = -9581.6584**

|   |          |           |           |
|---|----------|-----------|-----------|
| N | 0.579900 | -3.219500 | -0.764400 |
| C | 1.052100 | -4.027200 | -1.739300 |
| N | 2.293400 | -4.081000 | -2.243600 |
| C | 3.117700 | -3.208200 | -1.624700 |
| C | 2.766600 | -2.322300 | -0.593600 |

|   |           |           |           |
|---|-----------|-----------|-----------|
| C | 1.413800  | -2.313000 | -0.182000 |
| N | 4.462300  | -2.992500 | -1.839800 |
| C | 4.868200  | -2.030000 | -0.949100 |
| N | 3.880800  | -1.596700 | -0.173900 |
| N | 0.927000  | -1.472800 | 0.763200  |
| N | -2.128400 | -3.427300 | 0.132800  |
| C | -2.787800 | -4.588100 | -0.210200 |
| N | -4.099800 | -4.766400 | -0.067700 |
| C | -4.719900 | -3.685800 | 0.460200  |
| C | -4.134700 | -2.482200 | 0.876200  |
| C | -2.731500 | -2.307600 | 0.720200  |
| N | -6.060400 | -3.540800 | 0.731700  |
| C | -6.237200 | -2.291800 | 1.289400  |
| N | -5.101100 | -1.621700 | 1.395300  |
| O | -2.043300 | -1.301000 | 1.047300  |
| N | -2.024900 | -5.577000 | -0.769600 |
| N | -0.579900 | 3.219500  | -0.764400 |
| C | -1.052100 | 4.027200  | -1.739300 |
| N | -2.293400 | 4.081000  | -2.243600 |
| C | -3.117700 | 3.208200  | -1.624700 |
| C | -2.766600 | 2.322300  | -0.593600 |
| C | -1.413800 | 2.313000  | -0.182000 |
| N | -4.462300 | 2.992500  | -1.839800 |
| C | -4.868200 | 2.030000  | -0.949100 |
| N | -3.880800 | 1.596700  | -0.173900 |
| N | -0.927000 | 1.472800  | 0.763200  |
| N | 2.128400  | 3.427300  | 0.132800  |
| C | 2.787800  | 4.588100  | -0.210200 |
| N | 4.099800  | 4.766400  | -0.067700 |
| C | 4.719900  | 3.685800  | 0.460200  |
| C | 4.134700  | 2.482200  | 0.876200  |
| C | 2.731500  | 2.307600  | 0.720200  |
| N | 6.060400  | 3.540800  | 0.731700  |
| C | 6.237200  | 2.291800  | 1.289400  |
| N | 5.101100  | 1.621700  | 1.395300  |
| O | 2.043300  | 1.301000  | 1.047300  |
| N | 2.024900  | 5.577000  | -0.769600 |
| H | 0.326100  | -4.708200 | -2.176000 |
| H | 5.047600  | -3.461200 | -2.522500 |
| H | 5.892600  | -1.689700 | -0.906800 |
| H | 1.434600  | -0.607600 | 0.936900  |
| H | -0.089100 | -1.433900 | 0.891200  |
| H | -1.117700 | -3.340800 | -0.142000 |
| H | -6.785600 | -4.229100 | 0.562000  |
| H | -7.210600 | -1.936300 | 1.593000  |
| H | -1.047500 | -5.625200 | -0.504700 |
| H | -2.479600 | -6.479700 | -0.856600 |
| H | -0.326100 | 4.708200  | -2.176000 |
| H | -5.047600 | 3.461200  | -2.522500 |
| H | -5.892600 | 1.689700  | -0.906800 |

|    |           |           |           |
|----|-----------|-----------|-----------|
| H  | -1.434600 | 0.607600  | 0.936900  |
| H  | 0.089100  | 1.433900  | 0.891200  |
| H  | 1.117700  | 3.340800  | -0.142000 |
| H  | 6.785600  | 4.229100  | 0.562000  |
| H  | 7.210600  | 1.936300  | 1.593000  |
| H  | 1.047500  | 5.625200  | -0.504700 |
| H  | 2.479600  | 6.479700  | -0.856600 |
| Na | 4.180200  | -0.508700 | 1.965800  |
| Na | -4.180200 | 0.508700  | 1.965800  |

**(Na • I)<sub>2</sub> water C<sub>2h</sub> E = -9573.8613**

|   |           |           |          |
|---|-----------|-----------|----------|
| N | 0.591600  | -4.307200 | 0.000000 |
| C | 1.266300  | -5.475500 | 0.000000 |
| N | 2.590000  | -5.679000 | 0.000000 |
| C | 3.266700  | -4.510400 | 0.000000 |
| C | 2.707600  | -3.223000 | 0.000000 |
| C | 1.292400  | -3.134200 | 0.000000 |
| N | 4.630300  | -4.313100 | 0.000000 |
| C | 4.845900  | -2.959900 | 0.000000 |
| N | 3.716600  | -2.258600 | 0.000000 |
| N | 0.613600  | -1.971100 | 0.000000 |
| N | -2.325300 | -4.276300 | 0.000000 |
| C | -3.011600 | -5.478700 | 0.000000 |
| N | -4.344200 | -5.575100 | 0.000000 |
| C | -4.959800 | -4.372900 | 0.000000 |
| C | -4.355800 | -3.111300 | 0.000000 |
| C | -2.940200 | -3.020700 | 0.000000 |
| N | -6.311400 | -4.113900 | 0.000000 |
| C | -6.471100 | -2.741800 | 0.000000 |
| N | -5.315200 | -2.099000 | 0.000000 |
| O | -2.260000 | -1.952400 | 0.000000 |
| N | -2.271700 | -6.610200 | 0.000000 |
| N | -0.591600 | 4.307200  | 0.000000 |
| C | -1.266300 | 5.475500  | 0.000000 |
| N | -2.590000 | 5.679000  | 0.000000 |
| C | -3.266700 | 4.510400  | 0.000000 |
| C | -2.707600 | 3.223000  | 0.000000 |
| C | -1.292400 | 3.134200  | 0.000000 |
| N | -4.630300 | 4.313100  | 0.000000 |
| C | -4.845900 | 2.959900  | 0.000000 |
| N | -3.716600 | 2.258600  | 0.000000 |
| N | -0.613600 | 1.971100  | 0.000000 |
| N | 2.325300  | 4.276300  | 0.000000 |
| C | 3.011600  | 5.478700  | 0.000000 |
| N | 4.344200  | 5.575100  | 0.000000 |
| C | 4.959800  | 4.372900  | 0.000000 |
| C | 4.355800  | 3.111300  | 0.000000 |
| C | 2.940200  | 3.020700  | 0.000000 |
| N | 6.311400  | 4.113900  | 0.000000 |



|    |           |           |          |
|----|-----------|-----------|----------|
| C  | 6.471100  | 2.741800  | 0.000000 |
| N  | 5.315200  | 2.099000  | 0.000000 |
| O  | 2.260000  | 1.952400  | 0.000000 |
| N  | 2.271700  | 6.610200  | 0.000000 |
| H  | 0.658400  | -6.376400 | 0.000000 |
| H  | 5.344000  | -5.033500 | 0.000000 |
| H  | 5.843000  | -2.544100 | 0.000000 |
| H  | 1.114000  | -1.094200 | 0.000000 |
| H  | -0.414300 | -1.960500 | 0.000000 |
| H  | -1.277000 | -4.288200 | 0.000000 |
| H  | -7.055700 | -4.802900 | 0.000000 |
| H  | -7.449200 | -2.284000 | 0.000000 |
| H  | -1.264000 | -6.594800 | 0.000000 |
| H  | -2.740300 | -7.506000 | 0.000000 |
| H  | -0.658400 | 6.376400  | 0.000000 |
| H  | -5.344000 | 5.033500  | 0.000000 |
| H  | -5.843000 | 2.544100  | 0.000000 |
| H  | -1.114000 | 1.094200  | 0.000000 |
| H  | 0.414300  | 1.960500  | 0.000000 |
| H  | 1.277000  | 4.288200  | 0.000000 |
| H  | 7.055700  | 4.802900  | 0.000000 |
| H  | 7.449200  | 2.284000  | 0.000000 |
| H  | 1.264000  | 6.594800  | 0.000000 |
| H  | 2.740300  | 7.506000  | 0.000000 |
| Na | 3.891000  | 0.128500  | 0.000000 |
| Na | -3.891000 | -0.128500 | 0.000000 |

**(Na • II)<sub>2</sub> gas phase C<sub>2</sub>      E = -9431.0478**

|   |           |           |           |
|---|-----------|-----------|-----------|
| N | -2.968100 | -3.235400 | -0.643100 |
| C | -3.800100 | -4.213400 | -1.166700 |
| N | -4.998000 | -3.974300 | -1.680200 |
| C | -5.340800 | -2.675600 | -1.625400 |
| C | -4.570200 | -1.610100 | -1.144400 |
| C | -3.274600 | -1.873200 | -0.621600 |
| N | -6.520800 | -2.094300 | -2.038600 |
| C | -6.427400 | -0.738900 | -1.787800 |
| N | -5.267500 | -0.407700 | -1.248600 |
| O | -2.456300 | -1.022100 | -0.159400 |
| N | -3.342200 | -5.500300 | -1.094700 |
| H | -7.309900 | -2.582200 | -2.451500 |
| H | -2.132100 | -3.553500 | -0.091600 |
| N | 2.968100  | 3.235400  | -0.643100 |
| C | 3.800100  | 4.213400  | -1.166700 |
| N | 4.998000  | 3.974300  | -1.680200 |
| C | 5.340800  | 2.675600  | -1.625400 |
| C | 4.570200  | 1.610100  | -1.144400 |
| C | 3.274600  | 1.873200  | -0.621600 |
| N | 6.520800  | 2.094300  | -2.038600 |
| C | 6.427400  | 0.738900  | -1.787800 |

|    |           |           |           |
|----|-----------|-----------|-----------|
| N  | 5.267500  | 0.407700  | -1.248600 |
| O  | 2.456300  | 1.022100  | -0.159400 |
| N  | 3.342200  | 5.500300  | -1.094700 |
| H  | 7.309900  | 2.582200  | -2.451500 |
| H  | 2.132100  | 3.553500  | -0.091600 |
| N  | -2.461700 | 2.654000  | 0.976600  |
| C  | -3.046000 | 3.675800  | 1.663900  |
| N  | -2.480800 | 4.787100  | 2.128800  |
| C  | -1.179600 | 4.850600  | 1.810600  |
| C  | -0.444700 | 3.895800  | 1.089900  |
| C  | -1.128800 | 2.720100  | 0.703200  |
| N  | -0.273800 | 5.852900  | 2.105100  |
| C  | 0.932000  | 5.486400  | 1.556600  |
| N  | 0.871400  | 4.318200  | 0.932400  |
| N  | -0.524500 | 1.684600  | 0.063900  |
| H  | -0.475200 | 6.697200  | 2.632300  |
| Na | -3.827600 | 1.010900  | -0.050800 |
| N  | 2.461700  | -2.654000 | 0.976600  |
| C  | 3.046000  | -3.675800 | 1.663900  |
| N  | 2.480800  | -4.787100 | 2.128800  |
| C  | 1.179600  | -4.850600 | 1.810600  |
| C  | 0.444700  | -3.895800 | 1.089900  |
| C  | 1.128800  | -2.720100 | 0.703200  |
| N  | 0.273800  | -5.852900 | 2.105100  |
| C  | -0.932000 | -5.486400 | 1.556600  |
| N  | -0.871400 | -4.318200 | 0.932400  |
| N  | 0.524500  | -1.684600 | 0.063900  |
| H  | 0.475200  | -6.697200 | 2.632300  |
| Na | 3.827600  | -1.010900 | -0.050800 |
| H  | -1.035200 | 0.811800  | -0.023400 |
| H  | 0.495300  | 1.622600  | 0.028200  |
| H  | -0.495300 | -1.622600 | 0.028200  |
| H  | 1.035200  | -0.811800 | -0.023400 |
| H  | -3.896200 | -6.184600 | -1.599400 |
| H  | -2.342200 | -5.662800 | -1.070900 |
| H  | 2.342200  | 5.662800  | -1.070900 |
| H  | 3.896200  | 6.184600  | -1.599400 |
| H  | 1.818000  | 6.102300  | 1.640000  |
| H  | -1.818000 | -6.102300 | 1.640000  |
| H  | -7.234900 | -0.056400 | -2.016200 |
| H  | 7.234900  | 0.056400  | -2.016200 |
| H  | -4.110200 | 3.562300  | 1.864000  |
| H  | 4.110200  | -3.562300 | 1.864000  |

**(Na • II)<sub>2</sub> gas phase C<sub>2h</sub>      E = -9426.7205**

|   |           |           |          |
|---|-----------|-----------|----------|
| N | -3.442800 | -3.609200 | 0.000000 |
| C | -4.504100 | -4.508700 | 0.000000 |
| N | -5.782600 | -4.153300 | 0.000000 |
| C | -5.960300 | -2.822800 | 0.000000 |

|    |           |           |          |
|----|-----------|-----------|----------|
| C  | -4.969800 | -1.834400 | 0.000000 |
| C  | -3.604100 | -2.219900 | 0.000000 |
| N  | -7.150000 | -2.125100 | 0.000000 |
| C  | -6.841200 | -0.777500 | 0.000000 |
| N  | -5.538000 | -0.560200 | 0.000000 |
| O  | -2.607200 | -1.435800 | 0.000000 |
| N  | -4.194400 | -5.828300 | 0.000000 |
| H  | -8.078700 | -2.535100 | 0.000000 |
| H  | -2.468100 | -3.981300 | 0.000000 |
| N  | 3.442800  | 3.609200  | 0.000000 |
| C  | 4.504100  | 4.508700  | 0.000000 |
| N  | 5.782600  | 4.153300  | 0.000000 |
| C  | 5.960300  | 2.822800  | 0.000000 |
| C  | 4.969800  | 1.834400  | 0.000000 |
| C  | 3.604100  | 2.219900  | 0.000000 |
| N  | 7.150000  | 2.125100  | 0.000000 |
| C  | 6.841200  | 0.777500  | 0.000000 |
| N  | 5.538000  | 0.560200  | 0.000000 |
| O  | 2.607200  | 1.435800  | 0.000000 |
| N  | 4.194400  | 5.828300  | 0.000000 |
| H  | 8.078700  | 2.535100  | 0.000000 |
| H  | 2.468100  | 3.981300  | 0.000000 |
| N  | -2.371300 | 2.796500  | 0.000000 |
| C  | -3.182400 | 3.890300  | 0.000000 |
| N  | -2.836100 | 5.173400  | 0.000000 |
| C  | -1.502900 | 5.323600  | 0.000000 |
| C  | -0.530700 | 4.306600  | 0.000000 |
| C  | -1.017700 | 2.974000  | 0.000000 |
| N  | -0.790900 | 6.505400  | 0.000000 |
| C  | 0.540500  | 6.172200  | 0.000000 |
| N  | 0.751500  | 4.863600  | 0.000000 |
| N  | -0.220500 | 1.882600  | 0.000000 |
| H  | -1.191300 | 7.438300  | 0.000000 |
| Na | -3.585000 | 0.753400  | 0.000000 |
| N  | 2.371300  | -2.796500 | 0.000000 |
| C  | 3.182400  | -3.890300 | 0.000000 |
| N  | 2.836100  | -5.173400 | 0.000000 |
| C  | 1.502900  | -5.323600 | 0.000000 |
| C  | 0.530700  | -4.306600 | 0.000000 |
| C  | 1.017700  | -2.974000 | 0.000000 |
| N  | 0.790900  | -6.505400 | 0.000000 |
| C  | -0.540500 | -6.172200 | 0.000000 |
| N  | -0.751500 | -4.863600 | 0.000000 |
| N  | 0.220500  | -1.882600 | 0.000000 |
| H  | 1.191300  | -7.438300 | 0.000000 |
| Na | 3.585000  | -0.753400 | 0.000000 |
| H  | -0.658300 | 0.971800  | 0.000000 |
| H  | 0.804300  | 1.923900  | 0.000000 |
| H  | -0.804300 | -1.923900 | 0.000000 |
| H  | 0.658300  | -0.971800 | 0.000000 |

|   |           |           |          |
|---|-----------|-----------|----------|
| H | -4.952500 | -6.498100 | 0.000000 |
| H | -3.242900 | -6.154100 | 0.000000 |
| H | 3.242900  | 6.154100  | 0.000000 |
| H | 4.952500  | 6.498100  | 0.000000 |
| H | 1.300900  | 6.941700  | 0.000000 |
| H | -1.300900 | -6.941700 | 0.000000 |
| H | -7.607500 | -0.014900 | 0.000000 |
| H | 7.607500  | 0.014900  | 0.000000 |
| H | -4.252400 | 3.688200  | 0.000000 |
| H | 4.252400  | -3.688200 | 0.000000 |

**(Na • II)<sub>2</sub> water C<sub>2</sub> E = -9585.6708**

|   |           |           |           |
|---|-----------|-----------|-----------|
| N | -2.144000 | -1.303300 | 0.885700  |
| C | -2.768200 | -1.139200 | 2.106900  |
| N | -4.038700 | -0.768600 | 2.249600  |
| C | -4.672500 | -0.583300 | 1.068300  |
| C | -4.141800 | -0.771000 | -0.211000 |
| C | -2.778400 | -1.141500 | -0.348800 |
| N | -5.967800 | -0.175000 | 0.854800  |
| C | -6.165300 | -0.123300 | -0.511300 |
| N | -5.085700 | -0.474300 | -1.191100 |
| O | -2.153900 | -1.286400 | -1.435000 |
| N | -1.989400 | -1.323500 | 3.217900  |
| H | -6.656500 | 0.042300  | 1.567400  |
| H | -1.114400 | -1.501500 | 0.861300  |
| N | 2.144000  | 1.303300  | 0.885700  |
| C | 2.768200  | 1.139200  | 2.106900  |
| N | 4.038700  | 0.768600  | 2.249600  |
| C | 4.672500  | 0.583300  | 1.068300  |
| C | 4.141800  | 0.771000  | -0.211000 |
| C | 2.778400  | 1.141500  | -0.348800 |
| N | 5.967800  | 0.175000  | 0.854800  |
| C | 6.165300  | 0.123300  | -0.511300 |
| N | 5.085700  | 0.474300  | -1.191100 |
| O | 2.153900  | 1.286400  | -1.435000 |
| N | 1.989400  | 1.323500  | 3.217900  |
| H | 6.656500  | -0.042300 | 1.567400  |
| H | 1.114400  | 1.501500  | 0.861300  |
| N | -2.834800 | 2.124500  | -2.137700 |
| C | -3.917800 | 2.536700  | -1.439300 |
| N | -4.032300 | 2.733200  | -0.118500 |
| C | -2.880500 | 2.449200  | 0.525100  |
| C | -1.663300 | 2.064000  | -0.063400 |
| C | -1.654900 | 1.922200  | -1.474800 |
| N | -2.640000 | 2.454400  | 1.882500  |
| C | -1.332400 | 2.081100  | 2.066500  |
| N | -0.701600 | 1.844600  | 0.924500  |
| N | -0.570800 | 1.571700  | -2.186200 |
| H | -3.309200 | 2.675900  | 2.611700  |

|    |           |           |           |
|----|-----------|-----------|-----------|
| Na | -3.579600 | -0.195100 | -3.155800 |
| N  | 2.834800  | -2.124500 | -2.137700 |
| C  | 3.917800  | -2.536700 | -1.439300 |
| N  | 4.032300  | -2.733200 | -0.118500 |
| C  | 2.880500  | -2.449200 | 0.525100  |
| C  | 1.663300  | -2.064000 | -0.063400 |
| C  | 1.654900  | -1.922200 | -1.474800 |
| N  | 2.640000  | -2.454400 | 1.882500  |
| C  | 1.332400  | -2.081100 | 2.066500  |
| N  | 0.701600  | -1.844600 | 0.924500  |
| N  | 0.570800  | -1.571700 | -2.186200 |
| H  | 3.309200  | -2.675900 | 2.611700  |
| Na | 3.579600  | 0.195100  | -3.155800 |
| H  | -0.644300 | 1.536800  | -3.195900 |
| H  | 0.354400  | 1.436700  | -1.762600 |
| H  | -0.354400 | -1.436700 | -1.762600 |
| H  | 0.644300  | -1.536800 | -3.195900 |
| H  | -2.502400 | -1.362900 | 4.093100  |
| H  | -1.245200 | -2.008900 | 3.153900  |
| H  | 1.245200  | 2.008900  | 3.153900  |
| H  | 2.502400  | 1.362900  | 4.093100  |
| H  | -0.911900 | 1.983300  | 3.056400  |
| H  | 0.911900  | -1.983300 | 3.056400  |
| H  | -7.111200 | 0.179100  | -0.936600 |
| H  | 7.111200  | -0.179100 | -0.936600 |
| H  | -4.813200 | 2.713800  | -2.030100 |
| H  | 4.813200  | -2.713800 | -2.030100 |

**(Na • II)<sub>2</sub> water C<sub>2h</sub> E = -9572.8853**

|   |           |           |          |
|---|-----------|-----------|----------|
| N | -3.477000 | -3.675900 | 0.000000 |
| C | -4.533900 | -4.570800 | 0.000000 |
| N | -5.817900 | -4.205800 | 0.000000 |
| C | -5.986600 | -2.866300 | 0.000000 |
| C | -4.987600 | -1.888300 | 0.000000 |
| C | -3.626000 | -2.286900 | 0.000000 |
| N | -7.168100 | -2.161400 | 0.000000 |
| C | -6.849300 | -0.817600 | 0.000000 |
| N | -5.543700 | -0.610100 | 0.000000 |
| O | -2.622100 | -1.516800 | 0.000000 |
| N | -4.224900 | -5.886600 | 0.000000 |
| H | -8.103500 | -2.554000 | 0.000000 |
| H | -2.501600 | -4.049000 | 0.000000 |
| N | 3.477000  | 3.675900  | 0.000000 |
| C | 4.533900  | 4.570800  | 0.000000 |
| N | 5.817900  | 4.205800  | 0.000000 |
| C | 5.986600  | 2.866300  | 0.000000 |
| C | 4.987600  | 1.888300  | 0.000000 |
| C | 3.626000  | 2.286900  | 0.000000 |
| N | 7.168100  | 2.161400  | 0.000000 |

|    |           |           |          |
|----|-----------|-----------|----------|
| C  | 6.849300  | 0.817600  | 0.000000 |
| N  | 5.543700  | 0.610100  | 0.000000 |
| O  | 2.622100  | 1.516800  | 0.000000 |
| N  | 4.224900  | 5.886600  | 0.000000 |
| H  | 8.103500  | 2.554000  | 0.000000 |
| H  | 2.501600  | 4.049000  | 0.000000 |
| N  | -2.348600 | 2.835900  | 0.000000 |
| C  | -3.153800 | 3.922400  | 0.000000 |
| N  | -2.803100 | 5.214600  | 0.000000 |
| C  | -1.461900 | 5.363400  | 0.000000 |
| C  | -0.502800 | 4.336800  | 0.000000 |
| C  | -0.993600 | 3.007200  | 0.000000 |
| N  | -0.738600 | 6.534700  | 0.000000 |
| C  | 0.587800  | 6.192000  | 0.000000 |
| N  | 0.783800  | 4.879700  | 0.000000 |
| N  | -0.202400 | 1.917900  | 0.000000 |
| H  | -1.115100 | 7.476700  | 0.000000 |
| Na | -3.556100 | 0.749200  | 0.000000 |
| N  | 2.348600  | -2.835900 | 0.000000 |
| C  | 3.153800  | -3.922400 | 0.000000 |
| N  | 2.803100  | -5.214600 | 0.000000 |
| C  | 1.461900  | -5.363400 | 0.000000 |
| C  | 0.502800  | -4.336800 | 0.000000 |
| C  | 0.993600  | -3.007200 | 0.000000 |
| N  | 0.738600  | -6.534700 | 0.000000 |
| C  | -0.587800 | -6.192000 | 0.000000 |
| N  | -0.783800 | -4.879700 | 0.000000 |
| N  | 0.202400  | -1.917900 | 0.000000 |
| H  | 1.115100  | -7.476700 | 0.000000 |
| Na | 3.556100  | -0.749200 | 0.000000 |
| H  | -0.638700 | 1.005400  | 0.000000 |
| H  | 0.822900  | 1.963700  | 0.000000 |
| H  | -0.822900 | -1.963700 | 0.000000 |
| H  | 0.638700  | -1.005400 | 0.000000 |
| H  | -4.970300 | -6.569800 | 0.000000 |
| H  | -3.271800 | -6.211500 | 0.000000 |
| H  | 3.271800  | 6.211500  | 0.000000 |
| H  | 4.970300  | 6.569800  | 0.000000 |
| H  | 1.354900  | 6.952800  | 0.000000 |
| H  | -1.354900 | -6.952800 | 0.000000 |
| H  | -7.611200 | -0.051500 | 0.000000 |
| H  | 7.611200  | 0.051500  | 0.000000 |
| H  | -4.222100 | 3.717500  | 0.000000 |
| H  | 4.222100  | -3.717500 | 0.000000 |

**(K • D)<sub>2</sub> gas phase C<sub>2</sub>            E = -9430.8644**

|   |          |           |           |
|---|----------|-----------|-----------|
| N | 0.552500 | -4.098900 | -0.520100 |
| C | 0.988300 | -5.332000 | -0.878900 |
| N | 2.094600 | -5.642600 | -1.555800 |

|   |           |           |           |
|---|-----------|-----------|-----------|
| C | 2.812000  | -4.550600 | -1.854200 |
| C | 2.498100  | -3.216300 | -1.535800 |
| C | 1.269900  | -3.002900 | -0.867300 |
| N | 4.010900  | -4.479600 | -2.538400 |
| C | 4.369600  | -3.154900 | -2.594400 |
| N | 3.493200  | -2.353800 | -1.999700 |
| N | 0.776000  | -1.771900 | -0.540800 |
| N | -1.864500 | -3.839800 | 0.913200  |
| C | -2.265600 | -4.917600 | 1.680300  |
| N | -3.478800 | -5.048700 | 2.195600  |
| C | -4.291500 | -4.023700 | 1.881000  |
| C | -3.983500 | -2.874300 | 1.137500  |
| C | -2.668500 | -2.735900 | 0.607300  |
| N | -5.614200 | -3.870500 | 2.233800  |
| C | -6.048500 | -2.671600 | 1.700300  |
| N | -5.098600 | -2.041500 | 1.033600  |
| O | -2.207200 | -1.776000 | -0.076900 |
| N | -1.342700 | -5.912500 | 1.861700  |
| N | -0.552500 | 4.098900  | -0.520100 |
| C | -0.988300 | 5.332000  | -0.878900 |
| N | -2.094600 | 5.642600  | -1.555800 |
| C | -2.812000 | 4.550600  | -1.854200 |
| C | -2.498100 | 3.216300  | -1.535800 |
| C | -1.269900 | 3.002900  | -0.867300 |
| N | -4.010900 | 4.479600  | -2.538400 |
| C | -4.369600 | 3.154900  | -2.594400 |
| N | -3.493200 | 2.353800  | -1.999700 |
| N | -0.776000 | 1.771900  | -0.540800 |
| N | 1.864500  | 3.839800  | 0.913200  |
| C | 2.265600  | 4.917600  | 1.680300  |
| N | 3.478800  | 5.048700  | 2.195600  |
| C | 4.291500  | 4.023700  | 1.881000  |
| C | 3.983500  | 2.874300  | 1.137500  |
| C | 2.668500  | 2.735900  | 0.607300  |
| N | 5.614200  | 3.870500  | 2.233800  |
| C | 6.048500  | 2.671600  | 1.700300  |
| N | 5.098600  | 2.041500  | 1.033600  |
| O | 2.207200  | 1.776000  | -0.076900 |
| N | 1.342700  | 5.912500  | 1.861700  |
| H | 0.344900  | -6.159500 | -0.585400 |
| H | 4.516000  | -5.268800 | -2.930200 |
| H | 5.278000  | -2.832200 | -3.087200 |
| H | 1.176000  | -0.967600 | -1.007100 |
| H | -0.225700 | -1.712200 | -0.317600 |
| H | -0.939600 | -3.898100 | 0.410700  |
| H | -6.159500 | -4.527500 | 2.783100  |
| H | -7.063300 | -2.322300 | 1.836000  |
| H | -0.357200 | -5.679500 | 1.830700  |
| H | -1.608300 | -6.634300 | 2.523500  |
| H | -0.344900 | 6.159500  | -0.585400 |

|   |           |           |           |
|---|-----------|-----------|-----------|
| H | -4.516000 | 5.268800  | -2.930200 |
| H | -5.278000 | 2.832200  | -3.087200 |
| H | -1.176000 | 0.967600  | -1.007100 |
| H | 0.225700  | 1.712200  | -0.317600 |
| H | 0.939600  | 3.898100  | 0.410700  |
| H | 6.159500  | 4.527500  | 2.783100  |
| H | 7.063300  | 2.322300  | 1.836000  |
| H | 0.357200  | 5.679500  | 1.830700  |
| H | 1.608300  | 6.634300  | 2.523500  |
| K | 4.276400  | 0.017100  | -0.655200 |
| K | -4.276400 | -0.017100 | -0.655200 |

**(K • D)<sub>2</sub> gas phase C<sub>2h</sub>      E = -9428.0694**

|   |           |           |          |
|---|-----------|-----------|----------|
| N | 0.471300  | -4.750500 | 0.000000 |
| C | 1.149800  | -5.921800 | 0.000000 |
| N | 2.466600  | -6.123800 | 0.000000 |
| C | 3.137600  | -4.962200 | 0.000000 |
| C | 2.590200  | -3.668300 | 0.000000 |
| C | 1.172900  | -3.584300 | 0.000000 |
| N | 4.506600  | -4.774900 | 0.000000 |
| C | 4.728600  | -3.421000 | 0.000000 |
| N | 3.607300  | -2.707300 | 0.000000 |
| N | 0.491000  | -2.416200 | 0.000000 |
| N | -2.458500 | -4.676300 | 0.000000 |
| C | -3.154000 | -5.877300 | 0.000000 |
| N | -4.479000 | -5.966300 | 0.000000 |
| C | -5.086100 | -4.769100 | 0.000000 |
| C | -4.487900 | -3.500700 | 0.000000 |
| C | -3.069000 | -3.414600 | 0.000000 |
| N | -6.441800 | -4.518000 | 0.000000 |
| C | -6.607700 | -3.145300 | 0.000000 |
| N | -5.457900 | -2.495400 | 0.000000 |
| O | -2.374300 | -2.355300 | 0.000000 |
| N | -2.423600 | -7.019300 | 0.000000 |
| N | -0.471300 | 4.750500  | 0.000000 |
| C | -1.149800 | 5.921800  | 0.000000 |
| N | -2.466600 | 6.123800  | 0.000000 |
| C | -3.137600 | 4.962200  | 0.000000 |
| C | -2.590200 | 3.668300  | 0.000000 |
| C | -1.172900 | 3.584300  | 0.000000 |
| N | -4.506600 | 4.774900  | 0.000000 |
| C | -4.728600 | 3.421000  | 0.000000 |
| N | -3.607300 | 2.707300  | 0.000000 |
| N | -0.491000 | 2.416200  | 0.000000 |
| N | 2.458500  | 4.676300  | 0.000000 |
| C | 3.154000  | 5.877300  | 0.000000 |
| N | 4.479000  | 5.966300  | 0.000000 |
| C | 5.086100  | 4.769100  | 0.000000 |
| C | 4.487900  | 3.500700  | 0.000000 |



|   |           |           |          |
|---|-----------|-----------|----------|
| C | 3.069000  | 3.414600  | 0.000000 |
| N | 6.441800  | 4.518000  | 0.000000 |
| C | 6.607700  | 3.145300  | 0.000000 |
| N | 5.457900  | 2.495400  | 0.000000 |
| O | 2.374300  | 2.355300  | 0.000000 |
| N | 2.423600  | 7.019300  | 0.000000 |
| H | 0.543500  | -6.825900 | 0.000000 |
| H | 5.204900  | -5.511600 | 0.000000 |
| H | 5.732500  | -3.017400 | 0.000000 |
| H | 1.000700  | -1.547400 | 0.000000 |
| H | -0.538500 | -2.401100 | 0.000000 |
| H | -1.410400 | -4.693700 | 0.000000 |
| H | -7.173500 | -5.221400 | 0.000000 |
| H | -7.588900 | -2.691200 | 0.000000 |
| H | -1.416300 | -7.018500 | 0.000000 |
| H | -2.917600 | -7.901900 | 0.000000 |
| H | -0.543500 | 6.825900  | 0.000000 |
| H | -5.204900 | 5.511600  | 0.000000 |
| H | -5.732500 | 3.017400  | 0.000000 |
| H | -1.000700 | 1.547400  | 0.000000 |
| H | 0.538500  | 2.401100  | 0.000000 |
| H | 1.410400  | 4.693700  | 0.000000 |
| H | 7.173500  | 5.221400  | 0.000000 |
| H | 7.588900  | 2.691200  | 0.000000 |
| H | 1.416300  | 7.018500  | 0.000000 |
| H | 2.917600  | 7.901900  | 0.000000 |
| K | 4.008200  | 0.141200  | 0.000000 |
| K | -4.008200 | -0.141200 | 0.000000 |

**(K • D)<sub>2</sub> water C<sub>2</sub>      E = -9585.0355**

|   |           |           |           |
|---|-----------|-----------|-----------|
| N | 1.123800  | -2.349400 | 0.363400  |
| C | 1.957300  | -2.942500 | 1.246000  |
| N | 3.231300  | -3.313100 | 1.067200  |
| C | 3.664500  | -3.009300 | -0.175500 |
| C | 2.917600  | -2.391200 | -1.188500 |
| C | 1.570100  | -2.072000 | -0.896600 |
| N | 4.905700  | -3.228400 | -0.733100 |
| C | 4.864500  | -2.745600 | -2.019100 |
| N | 3.685100  | -2.226500 | -2.339400 |
| N | 0.733600  | -1.509700 | -1.790000 |
| N | -1.445400 | -1.371200 | 1.087100  |
| C | -1.680400 | -1.062900 | 2.408900  |
| N | -2.796800 | -0.489500 | 2.851400  |
| C | -3.715800 | -0.303600 | 1.873300  |
| C | -3.593600 | -0.630500 | 0.516600  |
| C | -2.370200 | -1.184400 | 0.050200  |
| N | -4.972200 | 0.239000  | 1.992300  |
| C | -5.553100 | 0.212200  | 0.737700  |
| N | -4.754500 | -0.303500 | -0.179700 |

|   |           |           |           |
|---|-----------|-----------|-----------|
| O | -2.075500 | -1.485500 | -1.136400 |
| N | -0.711300 | -1.424200 | 3.304100  |
| N | -1.123800 | 2.349400  | 0.363400  |
| C | -1.957300 | 2.942500  | 1.246000  |
| N | -3.231300 | 3.313100  | 1.067200  |
| C | -3.664500 | 3.009300  | -0.175500 |
| C | -2.917600 | 2.391200  | -1.188500 |
| C | -1.570100 | 2.072000  | -0.896600 |
| N | -4.905700 | 3.228400  | -0.733100 |
| C | -4.864500 | 2.745600  | -2.019100 |
| N | -3.685100 | 2.226500  | -2.339400 |
| N | -0.733600 | 1.509700  | -1.790000 |
| N | 1.445400  | 1.371200  | 1.087100  |
| C | 1.680400  | 1.062900  | 2.408900  |
| N | 2.796800  | 0.489500  | 2.851400  |
| C | 3.715800  | 0.303600  | 1.873300  |
| C | 3.593600  | 0.630500  | 0.516600  |
| C | 2.370200  | 1.184400  | 0.050200  |
| N | 4.972200  | -0.239000 | 1.992300  |
| C | 5.553100  | -0.212200 | 0.737700  |
| N | 4.754500  | 0.303500  | -0.179700 |
| O | 2.075500  | 1.485500  | -1.136400 |
| N | 0.711300  | 1.424200  | 3.304100  |
| H | 1.529100  | -3.159600 | 2.222200  |
| H | 5.695400  | -3.681600 | -0.286600 |
| H | 5.723700  | -2.797300 | -2.672500 |
| H | 1.039400  | -1.425100 | -2.750800 |
| H | -0.273900 | -1.447300 | -1.594600 |
| H | -0.516800 | -1.796700 | 0.824900  |
| H | -5.401700 | 0.580200  | 2.845500  |
| H | -6.552700 | 0.585700  | 0.569200  |
| H | 0.244900  | -1.522900 | 2.985400  |
| H | -0.816000 | -1.058700 | 4.243600  |
| H | -1.529100 | 3.159600  | 2.222200  |
| H | -5.695400 | 3.681600  | -0.286600 |
| H | -5.723700 | 2.797300  | -2.672500 |
| H | -1.039400 | 1.425100  | -2.750800 |
| H | 0.273900  | 1.447300  | -1.594600 |
| H | 0.516800  | 1.796700  | 0.824900  |
| H | 5.401700  | -0.580200 | 2.845500  |
| H | 6.552700  | -0.585700 | 0.569200  |
| H | -0.244900 | 1.522900  | 2.985400  |
| H | 0.816000  | 1.058700  | 4.243600  |
| K | 4.093300  | 0.672300  | -2.988800 |
| K | -4.093300 | -0.672300 | -2.988800 |

**(K • D)<sub>2</sub> water C<sub>2h</sub> E = -9571.9555**

|   |          |           |          |
|---|----------|-----------|----------|
| N | 0.460600 | -4.840100 | 0.000000 |
| C | 1.136300 | -6.008100 | 0.000000 |

|   |           |           |          |
|---|-----------|-----------|----------|
| N | 2.460700  | -6.211400 | 0.000000 |
| C | 3.138300  | -5.041800 | 0.000000 |
| C | 2.578700  | -3.754400 | 0.000000 |
| C | 1.163300  | -3.667500 | 0.000000 |
| N | 4.501400  | -4.841300 | 0.000000 |
| C | 4.711500  | -3.484300 | 0.000000 |
| N | 3.582100  | -2.785100 | 0.000000 |
| N | 0.489700  | -2.502800 | 0.000000 |
| N | -2.470900 | -4.781000 | 0.000000 |
| C | -3.171600 | -5.972800 | 0.000000 |
| N | -4.505000 | -6.048600 | 0.000000 |
| C | -5.102300 | -4.835600 | 0.000000 |
| C | -4.484800 | -3.578000 | 0.000000 |
| C | -3.065300 | -3.510100 | 0.000000 |
| N | -6.451100 | -4.565500 | 0.000000 |
| C | -6.596700 | -3.190600 | 0.000000 |
| N | -5.436400 | -2.557300 | 0.000000 |
| O | -2.358800 | -2.464600 | 0.000000 |
| N | -2.446600 | -7.115200 | 0.000000 |
| N | -0.460600 | 4.840100  | 0.000000 |
| C | -1.136300 | 6.008100  | 0.000000 |
| N | -2.460700 | 6.211400  | 0.000000 |
| C | -3.138300 | 5.041800  | 0.000000 |
| C | -2.578700 | 3.754400  | 0.000000 |
| C | -1.163300 | 3.667500  | 0.000000 |
| N | -4.501400 | 4.841300  | 0.000000 |
| C | -4.711500 | 3.484300  | 0.000000 |
| N | -3.582100 | 2.785100  | 0.000000 |
| N | -0.489700 | 2.502800  | 0.000000 |
| N | 2.470900  | 4.781000  | 0.000000 |
| C | 3.171600  | 5.972800  | 0.000000 |
| N | 4.505000  | 6.048600  | 0.000000 |
| C | 5.102300  | 4.835600  | 0.000000 |
| C | 4.484800  | 3.578000  | 0.000000 |
| C | 3.065300  | 3.510100  | 0.000000 |
| N | 6.451100  | 4.565500  | 0.000000 |
| C | 6.596700  | 3.190600  | 0.000000 |
| N | 5.436400  | 2.557300  | 0.000000 |
| O | 2.358800  | 2.464600  | 0.000000 |
| N | 2.446600  | 7.115200  | 0.000000 |
| H | 0.527300  | -6.908700 | 0.000000 |
| H | 5.217300  | -5.559500 | 0.000000 |
| H | 5.708200  | -3.067200 | 0.000000 |
| H | 0.999000  | -1.631200 | 0.000000 |
| H | -0.539200 | -2.484400 | 0.000000 |
| H | -1.424300 | -4.806500 | 0.000000 |
| H | -7.200900 | -5.248600 | 0.000000 |
| H | -7.571400 | -2.725000 | 0.000000 |
| H | -1.438500 | -7.113300 | 0.000000 |
| H | -2.927300 | -8.004500 | 0.000000 |

|   |           |           |          |
|---|-----------|-----------|----------|
| H | -0.527300 | 6.908700  | 0.000000 |
| H | -5.217300 | 5.559500  | 0.000000 |
| H | -5.708200 | 3.067200  | 0.000000 |
| H | -0.999000 | 1.631200  | 0.000000 |
| H | 0.539200  | 2.484400  | 0.000000 |
| H | 1.424300  | 4.806500  | 0.000000 |
| H | 7.200900  | 5.248600  | 0.000000 |
| H | 7.571400  | 2.725000  | 0.000000 |
| H | 1.438500  | 7.113300  | 0.000000 |
| H | 2.927300  | 8.004500  | 0.000000 |
| K | 3.967400  | 0.076100  | 0.000000 |
| K | -3.967400 | -0.076100 | 0.000000 |

**(K • II)<sub>2</sub> gas phase C<sub>2</sub>      E = -9432.8127**

|   |           |           |           |
|---|-----------|-----------|-----------|
| N | -2.653300 | -2.992700 | -0.702600 |
| C | -3.173900 | -3.987500 | -1.511900 |
| N | -4.044600 | -3.765500 | -2.486700 |
| C | -4.401000 | -2.472600 | -2.584700 |
| C | -3.937800 | -1.387600 | -1.823700 |
| C | -2.958600 | -1.629100 | -0.817800 |
| N | -5.305600 | -1.922200 | -3.466500 |
| C | -5.368500 | -0.566600 | -3.202300 |
| N | -4.561700 | -0.204100 | -2.221300 |
| O | -2.392300 | -0.786900 | -0.067200 |
| N | -2.775100 | -5.263500 | -1.242500 |
| H | -5.830300 | -2.431500 | -4.171100 |
| H | -2.070800 | -3.282100 | 0.120300  |
| N | 2.653300  | 2.992700  | -0.702600 |
| C | 3.173900  | 3.987500  | -1.511900 |
| N | 4.044600  | 3.765500  | -2.486700 |
| C | 4.401000  | 2.472600  | -2.584700 |
| C | 3.937800  | 1.387600  | -1.823700 |
| C | 2.958600  | 1.629100  | -0.817800 |
| N | 5.305600  | 1.922200  | -3.466500 |
| C | 5.368500  | 0.566600  | -3.202300 |
| N | 4.561700  | 0.204100  | -2.221300 |
| O | 2.392300  | 0.786900  | -0.067200 |
| N | 2.775100  | 5.263500  | -1.242500 |
| H | 5.830300  | 2.431500  | -4.171100 |
| H | 2.070800  | 3.282100  | 0.120300  |
| N | -2.366600 | 2.654700  | 1.631100  |
| C | -2.766700 | 3.594000  | 2.528400  |
| N | -2.044400 | 4.559800  | 3.099500  |
| C | -0.781000 | 4.557300  | 2.650500  |
| C | -0.223900 | 3.668800  | 1.716500  |
| C | -1.064100 | 2.636000  | 1.236100  |
| N | 0.249500  | 5.418300  | 2.984700  |
| C | 1.349700  | 5.041500  | 2.252000  |
| N | 1.107500  | 3.996300  | 1.473000  |

|   |           |           |           |
|---|-----------|-----------|-----------|
| N | -0.638500 | 1.660800  | 0.389300  |
| H | 0.191300  | 6.179400  | 3.654000  |
| K | -4.307800 | 1.525300  | -0.064100 |
| N | 2.366600  | -2.654700 | 1.631100  |
| C | 2.766700  | -3.594000 | 2.528400  |
| N | 2.044400  | -4.559800 | 3.099500  |
| C | 0.781000  | -4.557300 | 2.650500  |
| C | 0.223900  | -3.668800 | 1.716500  |
| C | 1.064100  | -2.636000 | 1.236100  |
| N | -0.249500 | -5.418300 | 2.984700  |
| C | -1.349700 | -5.041500 | 2.252000  |
| N | -1.107500 | -3.996300 | 1.473000  |
| N | 0.638500  | -1.660800 | 0.389300  |
| H | -0.191300 | -6.179400 | 3.654000  |
| K | 4.307800  | -1.525300 | -0.064100 |
| H | -1.236300 | 0.845900  | 0.251700  |
| H | 0.363300  | 1.502800  | 0.285300  |
| H | -0.363300 | -1.502800 | 0.285300  |
| H | 1.236300  | -0.845900 | 0.251700  |
| H | -3.054800 | -5.973200 | -1.909300 |
| H | -1.930800 | -5.427100 | -0.708600 |
| H | 1.930800  | 5.427100  | -0.708600 |
| H | 3.054800  | 5.973200  | -1.909300 |
| H | 2.295800  | 5.561700  | 2.321300  |
| H | -2.295800 | -5.561700 | 2.321300  |
| H | -6.022200 | 0.092700  | -3.758000 |
| H | 6.022200  | -0.092700 | -3.758000 |
| H | -3.813400 | 3.546600  | 2.825800  |
| H | 3.813400  | -3.546600 | 2.825800  |

**(K • II)<sub>2</sub> gas phase C<sub>2h</sub> E = -9427.3233**

|   |           |           |          |
|---|-----------|-----------|----------|
| N | -3.732900 | -4.019100 | 0.000000 |
| C | -4.781200 | -4.928700 | 0.000000 |
| N | -6.061300 | -4.585000 | 0.000000 |
| C | -6.250300 | -3.255500 | 0.000000 |
| C | -5.273600 | -2.250300 | 0.000000 |
| C | -3.902600 | -2.626900 | 0.000000 |
| N | -7.451000 | -2.580300 | 0.000000 |
| C | -7.163600 | -1.227500 | 0.000000 |
| N | -5.865700 | -0.986300 | 0.000000 |
| O | -2.903400 | -1.853000 | 0.000000 |
| N | -4.458600 | -6.246600 | 0.000000 |
| H | -8.371500 | -3.008400 | 0.000000 |
| H | -2.754000 | -4.377500 | 0.000000 |
| N | 3.732900  | 4.019100  | 0.000000 |
| C | 4.781200  | 4.928700  | 0.000000 |
| N | 6.061300  | 4.585000  | 0.000000 |
| C | 6.250300  | 3.255500  | 0.000000 |
| C | 5.273600  | 2.250300  | 0.000000 |

|   |           |           |          |
|---|-----------|-----------|----------|
| C | 3.902600  | 2.626900  | 0.000000 |
| N | 7.451000  | 2.580300  | 0.000000 |
| C | 7.163600  | 1.227500  | 0.000000 |
| N | 5.865700  | 0.986300  | 0.000000 |
| O | 2.903400  | 1.853000  | 0.000000 |
| N | 4.458600  | 6.246600  | 0.000000 |
| H | 8.371500  | 3.008400  | 0.000000 |
| H | 2.754000  | 4.377500  | 0.000000 |
| N | -2.074700 | 3.103500  | 0.000000 |
| C | -2.901700 | 4.180800  | 0.000000 |
| N | -2.584500 | 5.473200  | 0.000000 |
| C | -1.255000 | 5.650400  | 0.000000 |
| C | -0.264600 | 4.652200  | 0.000000 |
| C | -0.727600 | 3.310800  | 0.000000 |
| N | -0.564700 | 6.845200  | 0.000000 |
| C | 0.773000  | 6.536000  | 0.000000 |
| N | 1.006900  | 5.231900  | 0.000000 |
| N | 0.095400  | 2.238600  | 0.000000 |
| H | -0.981800 | 7.770800  | 0.000000 |
| K | -3.750600 | 0.794100  | 0.000000 |
| N | 2.074700  | -3.103500 | 0.000000 |
| C | 2.901700  | -4.180800 | 0.000000 |
| N | 2.584500  | -5.473200 | 0.000000 |
| C | 1.255000  | -5.650400 | 0.000000 |
| C | 0.264600  | -4.652200 | 0.000000 |
| C | 0.727600  | -3.310800 | 0.000000 |
| N | 0.564700  | -6.845200 | 0.000000 |
| C | -0.773000 | -6.536000 | 0.000000 |
| N | -1.006900 | -5.231900 | 0.000000 |
| N | -0.095400 | -2.238600 | 0.000000 |
| H | 0.981800  | -7.770800 | 0.000000 |
| K | 3.750600  | -0.794100 | 0.000000 |
| H | -0.325700 | 1.320700  | 0.000000 |
| H | 1.121200  | 2.299300  | 0.000000 |
| H | -1.121200 | -2.299300 | 0.000000 |
| H | 0.325700  | -1.320700 | 0.000000 |
| H | -5.210800 | -6.923100 | 0.000000 |
| H | -3.504000 | -6.563800 | 0.000000 |
| H | 3.504000  | 6.563800  | 0.000000 |
| H | 5.210800  | 6.923100  | 0.000000 |
| H | 1.520000  | 7.318900  | 0.000000 |
| H | -1.520000 | -7.318900 | 0.000000 |
| H | -7.944800 | -0.479200 | 0.000000 |
| H | 7.944800  | 0.479200  | 0.000000 |
| H | -3.969900 | 3.962400  | 0.000000 |
| H | 3.969900  | -3.962400 | 0.000000 |

**(K • II)<sub>2</sub> water C<sub>2</sub> E = -9579.6430**

|   |           |           |           |
|---|-----------|-----------|-----------|
| N | -2.761700 | -3.023000 | -0.490300 |
|---|-----------|-----------|-----------|

|   |           |           |           |
|---|-----------|-----------|-----------|
| C | -3.404100 | -4.061300 | -1.128200 |
| N | -4.270800 | -3.889900 | -2.125200 |
| C | -4.458600 | -2.587600 | -2.438000 |
| C | -3.842700 | -1.466100 | -1.861800 |
| C | -2.911100 | -1.667600 | -0.806200 |
| N | -5.294800 | -2.075400 | -3.401000 |
| C | -5.168100 | -0.701500 | -3.370500 |
| N | -4.302300 | -0.292600 | -2.458400 |
| O | -2.256300 | -0.798800 | -0.166500 |
| N | -3.152300 | -5.316500 | -0.655400 |
| H | -5.898600 | -2.608700 | -4.017700 |
| H | -2.148700 | -3.251400 | 0.329500  |
| N | 2.761700  | 3.023000  | -0.490300 |
| C | 3.404100  | 4.061300  | -1.128200 |
| N | 4.270800  | 3.889900  | -2.125200 |
| C | 4.458600  | 2.587600  | -2.438000 |
| C | 3.842700  | 1.466100  | -1.861800 |
| C | 2.911100  | 1.667600  | -0.806200 |
| N | 5.294800  | 2.075400  | -3.401000 |
| C | 5.168100  | 0.701500  | -3.370500 |
| N | 4.302300  | 0.292600  | -2.458400 |
| O | 2.256300  | 0.798800  | -0.166500 |
| N | 3.152300  | 5.316500  | -0.655400 |
| H | 5.898600  | 2.608700  | -4.017700 |
| H | 2.148700  | 3.251400  | 0.329500  |
| N | -2.429300 | 2.618200  | 1.447900  |
| C | -2.884700 | 3.539700  | 2.325200  |
| N | -2.190100 | 4.478100  | 2.988200  |
| C | -0.881000 | 4.445100  | 2.662500  |
| C | -0.272000 | 3.557900  | 1.761800  |
| C | -1.097700 | 2.581200  | 1.155700  |
| N | 0.139400  | 5.255300  | 3.116100  |
| C | 1.291700  | 4.849700  | 2.492600  |
| N | 1.090700  | 3.829200  | 1.668300  |
| N | -0.640700 | 1.644700  | 0.293200  |
| H | 0.056000  | 6.013100  | 3.785200  |
| K | -4.351700 | 1.743300  | -0.495200 |
| N | 2.429300  | -2.618200 | 1.447900  |
| C | 2.884700  | -3.539700 | 2.325200  |
| N | 2.190100  | -4.478100 | 2.988200  |
| C | 0.881000  | -4.445100 | 2.662500  |
| C | 0.272000  | -3.557900 | 1.761800  |
| C | 1.097700  | -2.581200 | 1.155700  |
| N | -0.139400 | -5.255300 | 3.116100  |
| C | -1.291700 | -4.849700 | 2.492600  |
| N | -1.090700 | -3.829200 | 1.668300  |
| N | 0.640700  | -1.644700 | 0.293200  |
| H | -0.056000 | -6.013100 | 3.785200  |
| K | 4.351700  | -1.743300 | -0.495200 |
| H | -1.254200 | 0.866900  | 0.048100  |

|   |           |           |           |
|---|-----------|-----------|-----------|
| H | 0.362900  | 1.478800  | 0.206800  |
| H | -0.362900 | -1.478800 | 0.206800  |
| H | 1.254200  | -0.866900 | 0.048100  |
| H | -3.460200 | -6.085100 | -1.240700 |
| H | -2.294100 | -5.476700 | -0.139400 |
| H | 2.294100  | 5.476700  | -0.139400 |
| H | 3.460200  | 6.085100  | -1.240700 |
| H | 2.242400  | 5.331300  | 2.670900  |
| H | -2.242400 | -5.331300 | 2.670900  |
| H | -5.735200 | -0.063900 | -4.033600 |
| H | 5.735200  | 0.063900  | -4.033600 |
| H | -3.955300 | 3.513700  | 2.517400  |
| H | 3.955300  | -3.513700 | 2.517400  |

**(K • II)<sub>2</sub> water C<sub>2h</sub> E = -9571.6847**

|   |           |           |          |
|---|-----------|-----------|----------|
| N | -3.771600 | -4.133200 | 0.000000 |
| C | -4.827600 | -5.026600 | 0.000000 |
| N | -6.110600 | -4.657700 | 0.000000 |
| C | -6.274300 | -3.315600 | 0.000000 |
| C | -5.275600 | -2.333300 | 0.000000 |
| C | -3.913000 | -2.738500 | 0.000000 |
| N | -7.458200 | -2.615000 | 0.000000 |
| C | -7.141300 | -1.269600 | 0.000000 |
| N | -5.837000 | -1.055700 | 0.000000 |
| O | -2.900200 | -1.987100 | 0.000000 |
| N | -4.520100 | -6.343800 | 0.000000 |
| H | -8.391900 | -3.011300 | 0.000000 |
| H | -2.795300 | -4.501500 | 0.000000 |
| N | 3.771600  | 4.133200  | 0.000000 |
| C | 4.827600  | 5.026600  | 0.000000 |
| N | 6.110600  | 4.657700  | 0.000000 |
| C | 6.274300  | 3.315600  | 0.000000 |
| C | 5.275600  | 2.333300  | 0.000000 |
| C | 3.913000  | 2.738500  | 0.000000 |
| N | 7.458200  | 2.615000  | 0.000000 |
| C | 7.141300  | 1.269600  | 0.000000 |
| N | 5.837000  | 1.055700  | 0.000000 |
| O | 2.900200  | 1.987100  | 0.000000 |
| N | 4.520100  | 6.343800  | 0.000000 |
| H | 8.391900  | 3.011300  | 0.000000 |
| H | 2.795300  | 4.501500  | 0.000000 |
| N | -2.063100 | 3.212200  | 0.000000 |
| C | -2.874200 | 4.292300  | 0.000000 |
| N | -2.537400 | 5.591000  | 0.000000 |
| C | -1.197000 | 5.752300  | 0.000000 |
| C | -0.229000 | 4.733600  | 0.000000 |
| C | -0.710200 | 3.397800  | 0.000000 |
| N | -0.483200 | 6.931100  | 0.000000 |
| C | 0.846400  | 6.599600  | 0.000000 |



|   |           |           |          |
|---|-----------|-----------|----------|
| N | 1.054200  | 5.289000  | 0.000000 |
| N | 0.095200  | 2.319000  | 0.000000 |
| H | -0.867400 | 7.869600  | 0.000000 |
| K | -3.655400 | 0.783700  | 0.000000 |
| N | 2.063100  | -3.212200 | 0.000000 |
| C | 2.874200  | -4.292300 | 0.000000 |
| N | 2.537400  | -5.591000 | 0.000000 |
| C | 1.197000  | -5.752300 | 0.000000 |
| C | 0.229000  | -4.733600 | 0.000000 |
| C | 0.710200  | -3.397800 | 0.000000 |
| N | 0.483200  | -6.931100 | 0.000000 |
| C | -0.846400 | -6.599600 | 0.000000 |
| N | -1.054200 | -5.289000 | 0.000000 |
| N | -0.095200 | -2.319000 | 0.000000 |
| H | 0.867400  | -7.869600 | 0.000000 |
| K | 3.655400  | -0.783700 | 0.000000 |
| H | -0.324200 | 1.399000  | 0.000000 |
| H | 1.120100  | 2.383000  | 0.000000 |
| H | -1.120100 | -2.383000 | 0.000000 |
| H | 0.324200  | -1.399000 | 0.000000 |
| H | -5.265800 | -7.026200 | 0.000000 |
| H | -3.567500 | -6.669900 | 0.000000 |
| H | 3.567500  | 6.669900  | 0.000000 |
| H | 5.265800  | 7.026200  | 0.000000 |
| H | 1.607500  | 7.366200  | 0.000000 |
| H | -1.607500 | -7.366200 | 0.000000 |
| H | -7.906500 | -0.507200 | 0.000000 |
| H | 7.906500  | 0.507200  | 0.000000 |
| H | -3.940900 | 4.079800  | 0.000000 |
| H | 3.940900  | -4.079800 | 0.000000 |

**Guanine gas phase C<sub>1</sub> E = -2456.1560**

|   |          |           |           |
|---|----------|-----------|-----------|
| N | 2.830700 | 1.694000  | 0.078200  |
| C | 3.899700 | 0.828700  | 0.041200  |
| N | 3.770500 | -0.482000 | 0.005300  |
| C | 2.470100 | -0.882800 | 0.020900  |
| C | 1.301600 | -0.106300 | 0.042700  |
| C | 1.420700 | 1.330400  | 0.079800  |
| N | 2.029000 | -2.186700 | -0.000800 |
| C | 0.637500 | -2.140800 | 0.009500  |
| N | 0.171200 | -0.912500 | 0.035700  |
| O | 0.575900 | 2.215000  | 0.116600  |
| N | 5.168000 | 1.386100  | 0.098400  |
| H | 2.622200 | -3.007400 | -0.019900 |
| H | 0.042200 | -3.043700 | -0.005200 |
| H | 2.987000 | 2.694800  | 0.170100  |
| H | 5.904100 | 0.716200  | -0.100200 |
| H | 5.301700 | 2.286100  | -0.350000 |

**Guanine water C<sub>1</sub> E = -2481.3570**

|   |          |           |           |
|---|----------|-----------|-----------|
| N | 2.825800 | 1.695000  | 0.075600  |
| C | 3.903700 | 0.832800  | 0.041200  |
| N | 3.769100 | -0.490000 | 0.010100  |
| C | 2.474100 | -0.892500 | 0.019700  |
| C | 1.315800 | -0.099600 | 0.050000  |
| C | 1.455800 | 1.321700  | 0.081400  |
| N | 2.016400 | -2.188000 | -0.005800 |
| C | 0.635700 | -2.135900 | 0.008500  |
| N | 0.172600 | -0.898000 | 0.042200  |
| O | 0.570800 | 2.200600  | 0.111200  |
| N | 5.146900 | 1.389700  | 0.090400  |
| H | 2.587500 | -3.025700 | -0.032000 |
| H | 0.036600 | -3.034900 | -0.009400 |
| H | 3.000100 | 2.696900  | 0.110100  |
| H | 5.922300 | 0.775900  | -0.133000 |
| H | 5.265300 | 2.360400  | -0.175800 |

**Adenine gas phase C<sub>1</sub> E = -2299.8969**

|   |           |           |           |
|---|-----------|-----------|-----------|
| N | 2.873500  | 1.759200  | 0.053300  |
| C | 3.867200  | 0.846200  | 0.043900  |
| N | 3.778100  | -0.495700 | 0.029200  |
| C | 2.496200  | -0.897100 | 0.023100  |
| C | 1.356500  | -0.074200 | 0.033500  |
| C | 1.596200  | 1.319300  | 0.051700  |
| N | 1.992800  | -2.186800 | 0.000500  |
| C | 0.609400  | -2.077400 | -0.004100 |
| N | 0.186100  | -0.829200 | 0.015100  |
| N | 0.583600  | 2.230800  | 0.089100  |
| H | 4.875100  | 1.255300  | 0.047000  |
| H | 2.543400  | -3.036500 | -0.013400 |
| H | -0.025400 | -2.953500 | -0.021700 |
| H | -0.367600 | 1.919400  | -0.051800 |
| H | 0.810900  | 3.208100  | -0.037600 |

**Adenine water C<sub>1</sub> E = -2314.8756**

|   |          |           |           |
|---|----------|-----------|-----------|
| N | 2.877700 | 1.760800  | 0.063000  |
| C | 3.871000 | 0.846900  | 0.047800  |
| N | 3.777800 | -0.494900 | 0.025300  |
| C | 2.489600 | -0.901400 | 0.018000  |
| C | 1.355700 | -0.071800 | 0.030100  |
| C | 1.589000 | 1.324600  | 0.053700  |
| N | 1.989700 | -2.186200 | -0.000900 |
| C | 0.616100 | -2.086200 | 0.000900  |
| N | 0.186300 | -0.832200 | 0.019400  |
| N | 0.587200 | 2.234500  | 0.048300  |
| H | 4.879400 | 1.253900  | 0.055200  |

|   |           |           |           |
|---|-----------|-----------|-----------|
| H | 2.529100  | -3.044700 | -0.011900 |
| H | -0.013100 | -2.964800 | -0.012700 |
| H | -0.374000 | 1.934600  | 0.143300  |
| H | 0.799100  | 3.217500  | 0.165900  |

**Adeninium (N1H) gas phase C<sub>1</sub> E = -2243.7404**

|   |           |           |           |
|---|-----------|-----------|-----------|
| N | 2.870400  | 1.710700  | 0.058700  |
| C | 3.930300  | 0.808700  | 0.046000  |
| N | 3.790700  | -0.487600 | 0.026400  |
| C | 2.497700  | -0.889600 | 0.019300  |
| C | 1.355600  | -0.065000 | 0.030800  |
| C | 1.545800  | 1.329500  | 0.051900  |
| N | 1.999200  | -2.164500 | -0.000300 |
| C | 0.614200  | -2.056600 | 0.000200  |
| N | 0.194000  | -0.806000 | 0.018700  |
| N | 0.550400  | 2.222400  | 0.064500  |
| H | 4.917900  | 1.259400  | 0.053600  |
| H | 2.548600  | -3.019600 | -0.012800 |
| H | -0.023000 | -2.931200 | -0.013500 |
| H | -0.404900 | 1.878000  | 0.058600  |
| H | 0.696100  | 3.224600  | 0.079800  |
| H | 3.104500  | 2.701800  | 0.073800  |

**Adeninium (N1H) water C<sub>1</sub> E = -2309.5304**

|   |           |           |           |
|---|-----------|-----------|-----------|
| N | 2.866800  | 1.706300  | 0.060900  |
| C | 3.916700  | 0.819900  | 0.045900  |
| N | 3.786700  | -0.485400 | 0.025200  |
| C | 2.489100  | -0.887900 | 0.019700  |
| C | 1.350000  | -0.065800 | 0.032800  |
| C | 1.543800  | 1.331700  | 0.052700  |
| N | 1.999000  | -2.165900 | -0.001400 |
| C | 0.624900  | -2.074000 | -0.000400 |
| N | 0.189900  | -0.821700 | 0.020000  |
| N | 0.573800  | 2.240400  | 0.061600  |
| H | 4.899400  | 1.274200  | 0.051800  |
| H | 2.545800  | -3.020700 | -0.015600 |
| H | -0.000400 | -2.954600 | -0.016200 |
| H | -0.392100 | 1.936500  | 0.062300  |
| H | 0.762300  | 3.235400  | 0.076900  |
| H | 3.093100  | 2.698400  | 0.076800  |

**Adeninium (N7H) gas phase C<sub>1</sub> E = -2235.9920**

|   |          |           |          |
|---|----------|-----------|----------|
| N | 2.868400 | 1.753600  | 0.059400 |
| C | 3.854900 | 0.843800  | 0.046500 |
| N | 3.741800 | -0.501300 | 0.026100 |
| C | 2.470600 | -0.877500 | 0.019400 |
| C | 1.342900 | -0.042400 | 0.031100 |

|   |           |           |           |
|---|-----------|-----------|-----------|
| C | 1.579700  | 1.360900  | 0.052400  |
| N | 1.979500  | -2.190900 | -0.000700 |
| C | 0.637600  | -2.166700 | -0.001500 |
| N | 0.225200  | -0.889200 | 0.017400  |
| N | 0.619700  | 2.310900  | 0.065900  |
| H | 4.866700  | 1.239900  | 0.053300  |
| H | 2.558500  | -3.027600 | -0.012900 |
| H | -0.009400 | -3.031800 | -0.015000 |
| H | -0.369400 | 2.108000  | 0.062100  |
| H | 0.911800  | 3.282700  | 0.080800  |
| H | -0.753800 | -0.620100 | 0.020700  |

**Adeninium (N7H) water C<sub>1</sub>                    E = -2305.3720**

|   |           |           |           |
|---|-----------|-----------|-----------|
| N | 2.877400  | 1.763000  | 0.061300  |
| C | 3.860000  | 0.843200  | 0.048000  |
| N | 3.753400  | -0.499100 | 0.024700  |
| C | 2.469900  | -0.889500 | 0.018800  |
| C | 1.357600  | -0.044800 | 0.033800  |
| C | 1.582400  | 1.354200  | 0.053100  |
| N | 1.969500  | -2.186400 | -0.003400 |
| C | 0.627600  | -2.141300 | -0.001600 |
| N | 0.233000  | -0.864900 | 0.019800  |
| N | 0.599900  | 2.271300  | 0.061900  |
| H | 4.871700  | 1.239100  | 0.055500  |
| H | 2.520100  | -3.039000 | -0.015500 |
| H | -0.026400 | -2.997200 | -0.008700 |
| H | -0.377200 | 2.012500  | 0.055000  |
| H | 0.834000  | 3.256800  | 0.073000  |
| H | -0.739000 | -0.574600 | 0.034400  |
